# Supplementary material for: Candidate methylation sites associated with endocrine therapy resistance in ER+/HER2- breast cancer
Source: BMC Cancer. 2020 Jul 19;20:676. doi: 10.1186/s12885-020-07100-z (PMC7368985; doi:10.1186/s12885-020-07100-z)
Supplement: Supplementary file 4 — Additional file 4. Single-locus survival analysis. Results of single-locus survival analysis on ER+/HER2-, TAM and AI cohorts. For each CpG the results of the correlation analysis and of the differential methylation analysis of month 7 versus WT in the T47D RA experiment are also included. [file 12885_2020_7100_MOESM4_ESM.xlsx]

## Sheet: ER+HER2-
Additional file 4 – Results of single-locus survival analysis, ER+/HER2- cohort
Annotation based on IlluminaHumanMethylation450kanno.ilmn12.hg19 R package
HR			Hazard ratio
CI			Confidence interval
Adj. P-value			Benjamini-Hochberg adjusted P-value
pos			Position on the chromosome (indicated in column 'chr')
Gene			Gene symbol | Entrez Gene ID
Correlation coefficient			Pearson correlation between gene expression and methylation profiles
P-value (corr.)			Pearson correlation test P-value
Adj. P-value (corr.)			Benjamini-Hochberg adjusted P-value for correlation test
log2FC (M7 vs. WT)			Log2 fold change of methylation at month 7 versus WT
Delta beta (M7 vs. WT)			Methylation beta value difference
P-Value (M7 vs. WT)			P-value of differential methylation test
Adj. P-value (M7 vs. WT)			Benjamini-Hochberg adjusted P-value of differential methylation test
CpG ID	log(HR)	HR	CI (lo 95)	CI (hi 95)	P-value	Adj. P-value	chr	pos	Relation_to_Island	UCSC_RefGene_Group	UCSC_RefGene_Name	Enhancer	Gene	Correlation coefficient	P-value (corr.)	Adj. P-value (corr.)	log2FC (M7 vs. WT)	Delta beta (M7 vs. WT)	P-Value (M7 vs. WT)	Adj. P-value (M7 vs. WT)
cg18240331	0.676035	1.96607	1.43999	2.68433	2.09024e-05	0.0499947	chr6	10419927	Island	TSS200	TFAP2A		TFAP2A|7020	-0.0860915	0.0431905	0.0817535	0.13536	0.00204822	0.409827	0.748414
cg09483904	0.472191	1.6035	1.30529	1.96986	6.87181e-06	0.0328826	chr6	33172551	Island	Body	HSD17B8		HSD17B8|7923	-0.193398	4.72155e-06	2.35192e-05	0.051948	0.000633625	0.846954	0.963468
cg15389490	0.41439	1.51345	1.25518	1.82485	1.42014e-05	0.0421445	chr6	33172333	Island	TSS200	HSD17B8		HSD17B8|7923	-0.237597	1.5976e-08	1.20162e-07	0.294591	0.00525861	0.132448	0.384913
cg26031954	-0.310695	0.732938	0.637634	0.842486	1.23337e-05	0.0391386	chr1	2139327	S_Shore	TSS200	C1orf86		C1orf86|199990	0.081318	0.0562139	0.102736	-0.0822324	-0.00209577	0.594384	0.868278
cg20379593	-0.319945	0.726189	0.628957	0.838453	1.28674e-05	0.0400395	chr11	65198023	OpenSea								-2.34079	-0.201398	4.17584e-08	3.93515e-06
cg13969327	-0.325154	0.722416	0.622409	0.838492	1.89438e-05	0.0478458	chr7	127526253	OpenSea	Body	SND1	TRUE	SND1|27044	-0.084847	0.0463132	0.0861262	0.141322	-0.0167385	0.705513	0.917177
cg01846046	-0.340851	0.711165	0.615472	0.821736	3.78756e-06	0.0265506	chr11	64034019	N_Shore	Body	PLCB3		PLCB3|5331	-0.198072	2.73713e-06	1.52703e-05	-0.271281	-0.0136237	0.54494	0.841622
cg10799386	-0.3411	0.710988	0.607934	0.831511	1.95998e-05	0.0483218	chr10	108332882	OpenSea			TRUE					-1.28287	-0.101869	0.00633748	0.0378886
cg05915866	-0.34348	0.709297	0.608853	0.826313	1.03976e-05	0.0367465	chr16	73090838	N_Shore	5'UTR	ZFHX3		ZFHX3|463	-0.412561	4.25644e-24	1.50394e-22	0.35711	0.0190044	0.387124	0.72925
cg09407859	-0.354275	0.701682	0.598163	0.823117	1.3604e-05	0.0411334	chr16	66995461	OpenSea	Body	CES3		CES3|23491	-0.476106	1.414e-32	1.49884e-30	2.72282	0.275967	2.22307e-08	2.50103e-06
cg23121785	-0.368288	0.691918	0.592042	0.808643	3.64997e-06	0.0265506	chr15	79501491	OpenSea	TSS1500	MIR184						-1.20577	-0.0974653	0.00104942	0.00914552
cg08975197	-0.376962	0.685942	0.580341	0.810759	9.89652e-06	0.0367465	chr12	70173946	OpenSea	Body;Body;5'UTR;Body;Body	RAB3IP;RAB3IP;RAB3IP;RAB3IP;RAB3IP		RAB3IP|117177	0.0450123	0.291111	0.40075	-0.200336	-0.0270816	0.495526	0.811231
cg23016243	-0.380737	0.683357	0.574466	0.81289	1.71498e-05	0.0465016	chr17	42983768	OpenSea	3'UTR	GFAP	TRUE	GFAP|2670	0.211781	5.12658e-07	3.01899e-06	-0.0374716	-0.00600786	0.905238	0.978651
cg25619717	-0.389892	0.67713	0.566266	0.809699	1.92076e-05	0.0480946	chr5	114867569	OpenSea	Body	FEM1C	TRUE	FEM1C|56929	-0.159475	0.000168278	0.000615084	-0.223291	-0.063654	0.590424	0.866353
cg22469870	-0.390237	0.676897	0.566842	0.808319	1.62881e-05	0.0452848	chr20	56272964	OpenSea	5'UTR;5'UTR;Body;Body	PMEPA1;PMEPA1;PMEPA1;PMEPA1	TRUE	PMEPA1|56937	-0.0241703	0.57094	0.657822	0.267663	0.0192961	0.317452	0.660571
cg14426167	-0.39116	0.676272	0.566297	0.807603	1.56175e-05	0.0446916	chr17	27972099	OpenSea	Body	SSH2	TRUE	SSH2|85464	-0.0249802	0.558102	0.650097	0.0169239	0.0013817	0.950848	0.989642
cg10416861	-0.399893	0.670392	0.560678	0.801575	1.15674e-05	0.0375287	chr11	65201834	OpenSea								-1.7272	-0.28308	1.33653e-06	5.15227e-05
cg04806177	-0.401948	0.669016	0.564045	0.793521	3.91491e-06	0.0265506	chr16	1991447	N_Shore	Body	SEPX1						-0.827272	-0.0626158	0.0231105	0.104587
cg14818176	-0.409462	0.664007	0.559934	0.787424	2.50595e-06	0.0243384	chr17	73148480	N_Shore	5'UTR;Body;Body	HN1;HN1;HN1		HN1|51155	-0.418492	8.15606e-25	4.32271e-23	0.616527	0.0408448	0.0479579	0.183193
cg03753454	-0.420011	0.65704	0.545632	0.791195	9.39818e-06	0.0367465	chr16	70787597	OpenSea	Body	VAC14		VAC14|55697	-0.0918728	0.0309127	0.0606805	-0.751765	-0.0560824	0.00585492	0.0355797
cg20435464	-0.423903	0.654487	0.541772	0.790652	1.10364e-05	0.03711	chr19	40711928	Island	Body	MAP3K10		MAP3K10|4294	0.142655	0.000775908	0.00234989	-0.0756961	-0.00137666	0.59403	0.868117
cg15228441	-0.425088	0.653712	0.554538	0.770622	4.10956e-07	0.00968515	chr17	78829930	N_Shore	Body;Body	RPTOR;RPTOR	TRUE	RPTOR|57521	0.170328	5.76699e-05	0.00024452	0.780125	0.0904111	0.036328	0.148115
cg25445431	-0.432073	0.649162	0.534007	0.789149	1.44621e-05	0.0425244	chr7	101630948	OpenSea	Body;Body;Body	CUX1;CUX1;CUX1		CUX1|1523	-0.134963	0.00148148	0.00392591	0.801368	0.0565942	0.00446136	0.0287512
cg07373212	-0.433506	0.648232	0.54235	0.774785	1.89501e-06	0.0222821	chr3	126577851	OpenSea	Body	CHCHD6	TRUE	CHCHD6|84303	0.0568319	0.182434	0.280261	-0.937592	-0.0896189	0.000550925	0.00549941
cg23475955	-0.435021	0.647251	0.533781	0.784843	9.71234e-06	0.0367465	chr11	1985762	N_Shore
cg20108600	-0.44763	0.639141	0.521119	0.783891	1.72656e-05	0.0465016	chr8	125464547	OpenSea	1stExon;3'UTR	TRMT12;TRMT12		TRMT12|55039	-0.302457	3.84936e-13	6.80054e-12	0.801345	0.0835751	0.00329512	0.0226305
cg09198866	-0.452024	0.636339	0.521045	0.777144	9.3334e-06	0.0367465	chr22	36809318	S_Shelf								1.92736	0.230567	1.74315e-09	4.07254e-07
cg10300814	-0.455056	0.634412	0.520814	0.772789	6.17466e-06	0.0328826	chr6	35565116	OpenSea	Body;Body;Body;Body	FKBP5;FKBP5;FKBP5;FKBP5	TRUE	FKBP5|2289	-0.0494694	0.245909	0.352249	0.0201032	0.000967162	0.917899	0.981613
cg21561057	-0.456234	0.633666	0.522602	0.768332	3.47831e-06	0.0265506	chr19	40711866	Island	Body	MAP3K10		MAP3K10|4294	0.193109	4.88133e-06	2.35192e-05
cg01392656	-0.457427	0.63291	0.525341	0.762505	1.4881e-06	0.0197808	chr12	125578483	Island	Body	AACS		AACS|65985	-0.124899	0.00328935	0.00774824	-0.331721	-0.0292286	0.368777	0.712639
cg23666374	-0.457974	0.632564	0.522076	0.766435	2.92792e-06	0.0260231	chr7	69120991	OpenSea	Body;Body;Body	AUTS2;AUTS2;AUTS2	TRUE	AUTS2|26053	0.0577058	0.175789	0.274024	-0.0314734	-0.00164887	0.92592	0.983566
cg26804057	-0.468318	0.626055	0.505148	0.7759	1.8903e-05	0.0478458	chr8	99130997	S_Shore	5'UTR;5'UTR;5'UTR	POP1;POP1;POP1		POP1|10940	-0.274388	5.44169e-11	7.21025e-10	0.288921	0.0126232	0.398531	0.739003
cg27243507	-0.468378	0.626017	0.514454	0.761773	2.90822e-06	0.0260231	chr3	101808873	OpenSea			TRUE					-0.660462	-0.105541	0.00182028	0.0141619
cg22829164	-0.472842	0.623229	0.508315	0.764121	5.44003e-06	0.0300613	chr10	101156363	OpenSea			TRUE					-0.450733	-0.0533903	0.18483	0.4802
cg16288421	-0.477522	0.620318	0.501612	0.767117	1.05159e-05	0.0367465	chr4	54213525	OpenSea	Body	SCFD2	TRUE	SCFD2|152579	-0.0670022	0.115859	0.18894	-1.37905	-0.223425	0.000284666	0.00326705
cg03474525	-0.479901	0.618844	0.501914	0.763015	7.07916e-06	0.0328826	chr6	167287812	S_Shelf
cg19542542	-0.480917	0.618216	0.501322	0.762367	6.88416e-06	0.0328826	chr4	41157025	OpenSea	5'UTR;5'UTR;5'UTR	APBB2;APBB2;APBB2	TRUE	APBB2|323	-0.267431	1.70686e-10	1.80927e-09	0.976487	0.130964	0.000302034	0.00342507
cg14076360	-0.481433	0.617898	0.514691	0.7418	2.42931e-07	0.00968515	chr5	61917363	OpenSea	Body;Body	IPO11;IPO11	TRUE	IPO11|51194	-0.0316701	0.457738	0.564188	0.0793038	0.00425593	0.761161	0.936876
cg08252585	-0.482399	0.617301	0.512437	0.743623	3.80709e-07	0.00968515	chr2	24931616	OpenSea	Body;Body;Body	NCOA1;NCOA1;NCOA1	TRUE	NCOA1|8648	0.174094	3.91468e-05	0.000172899	0.228285	0.0214914	0.518224	0.82555
cg11118690	-0.495682	0.609155	0.489518	0.758032	8.86308e-06	0.0367465	chr8	97351561	OpenSea			TRUE					0.840662	0.144159	0.000827147	0.00757341
cg23849099	-0.496547	0.608628	0.484611	0.764384	1.94545e-05	0.0483218	chr10	3457441	OpenSea								-0.130772	-0.0215356	0.580595	0.861297
cg04316126	-0.497228	0.608214	0.490061	0.754854	6.42662e-06	0.0328826	chr19	50366381	S_Shore	Body	PNKP		PNKP|11284	-0.0328762	0.440782	0.549681	0.104747	0.00472041	0.730443	0.926512
cg07128624	-0.49753	0.608031	0.486076	0.760584	1.32459e-05	0.040432	chr12	108153566	N_Shore	Body	PRDM4		PRDM4|11108	-0.325123	4.68109e-15	1.24049e-13	1.07791	0.154309	3.19345e-06	9.98551e-05
cg05876687	-0.503301	0.604532	0.487089	0.750292	4.95411e-06	0.0284198	chr16	1467955	N_Shelf								-0.461856	-0.031877	0.0720642	0.248361
cg02362848	-0.504351	0.603897	0.482524	0.755801	1.0548e-05	0.0367465	chr1	33848786	OpenSea			TRUE					1.35419	0.146805	0.000288201	0.0032982
cg14815778	-0.509632	0.600717	0.477674	0.755454	1.31201e-05	0.040432	chrX	152865295	S_Shore	TSS1500;TSS1500	FAM58A;FAM58A		FAM58A|92002	-0.0738692	0.0829239	0.144097	-0.136033	-0.00471861	0.63012	0.885775
ch.3.2780300F	-0.523953	0.592175	0.465453	0.753397	2.00075e-05	0.0486444	chr3	140053405	OpenSea	Body	CLSTN2		CLSTN2|64084	-0.0152067	0.721476	0.796629
cg24463527	-0.527659	0.589984	0.468215	0.743421	7.68518e-06	0.0342101	chr1	215648453	OpenSea			TRUE					0.969733	0.0726536	0.0103669	0.0558399
cg11759194	-0.529595	0.588843	0.466738	0.742893	7.95072e-06	0.034462	chr10	27447053	S_Shelf	Body	MASTL		MASTL|84930	-0.138518	0.00110313	0.00299825	-0.544271	-0.0424739	0.00916659	0.0506871
cg10515232	-0.529847	0.588695	0.472852	0.732918	2.14593e-06	0.0226155	chr2	240062353	S_Shore	Body	HDAC4		HDAC4|9759	-0.0114197	0.788927	0.85333	0.372852	0.00774863	0.462502	0.78914
cg26650651	-0.529948	0.588636	0.472706	0.732996	2.18415e-06	0.0226155	chr7	99723100	N_Shore	3'UTR;TSS1500	CNPY4;MBLAC1		CNPY4|245812	-0.0748228	0.0790177	0.139598	-1.44399	-0.114662	3.57515e-08	3.52312e-06
cg26650651	-0.529948	0.588636	0.472706	0.732996	2.18415e-06	0.0226155	chr7	99723100	N_Shore	3'UTR;TSS1500	CNPY4;MBLAC1		MBLAC1|255374	0.0370726	0.384665	0.508905	-1.44399	-0.114662	3.57515e-08	3.52312e-06
cg23240589	-0.533514	0.58654	0.462629	0.743641	1.05199e-05	0.0367465	chr2	55217063	OpenSea	Body;Body;Body;Body;Body	RTN4;RTN4;RTN4;RTN4;RTN4	TRUE	RTN4|57142	-0.0942865	0.02675	0.0534999	-0.133448	-0.0104125	0.643222	0.891847
cg12955084	-0.539793	0.582869	0.455876	0.745239	1.66831e-05	0.0457007	chr19	41886265	S_Shelf	Body;Body;Body;Body;Body;Body	TMEM91;TMEM91;TMEM91;TMEM91;TMEM91;TMEM91		TMEM91|641649	-0.00938047	0.825952	0.864788	0.076938	0.00407421	0.73426	0.927852
cg01969586	-0.541425	0.581919	0.462649	0.731935	3.71676e-06	0.0265506	chr19	45663415	OpenSea	TSS200	NKPD1		NKPD1|284353	0.0345714	0.41757	0.526933	-1.00089	-0.153767	0.000291891	0.00333233
cg26248460	-0.544305	0.580245	0.455641	0.738923	1.01949e-05	0.0367465	chr1	229757677	N_Shelf	5'UTR;5'UTR	TAF5L;TAF5L		TAF5L|27097	0.0178847	0.675015	0.761187	1.12258	0.145572	0.00082399	0.00755091
cg13214185	-0.54823	0.577972	0.455195	0.733865	6.80756e-06	0.0328826	chr14	107219616	N_Shore								0.96646	0.0736578	0.000498198	0.00508072
cg07510333	-0.551384	0.576152	0.450536	0.736791	1.11155e-05	0.03711	chr5	150831364	S_Shelf	5'UTR	SLC36A1		SLC36A1|206358	-0.182503	1.60033e-05	7.37543e-05	0.850115	0.0752452	0.0211622	0.0975786
cg22639242	-0.554935	0.57411	0.450418	0.73177	7.37874e-06	0.0333087	chr5	180227299	N_Shelf	5'UTR;5'UTR;5'UTR;5'UTR;5'UTR	MGAT1;MGAT1;MGAT1;MGAT1;MGAT1	TRUE	MGAT1|4245	-0.117468	0.00572387	0.0126402	0.965935	0.130684	0.000451825	0.00470126
cg23137088	-0.561408	0.570406	0.443504	0.733618	1.22753e-05	0.0391386	chr5	134736506	S_Shore	TSS1500	H2AFY		H2AFY|9555	-0.00469606	0.912344	0.925057	-0.303971	-0.0421606	0.341543	0.685951
cg15039415	-0.567725	0.566813	0.437982	0.73354	1.59358e-05	0.0451989	chr17	45690396	OpenSea	Body	NPEPPS	TRUE	NPEPPS|9520	-0.13147	0.00196619	0.00484689	0.517416	0.0750557	0.0574226	0.209679
cg13953978	-0.568986	0.566099	0.43711	0.733151	1.61284e-05	0.0452848	chr9	132600788	S_Shelf	5'UTR;5'UTR;5'UTR	USP20;USP20;USP20	TRUE	USP20|10868	0.0367452	0.38888	0.508905	0.186988	0.0292367	0.409829	0.748414
cg14791640	-0.592764	0.552797	0.423569	0.721452	1.28214e-05	0.0400395	chr1	85037040	N_Shelf	Body	CTBS		CTBS|1486	-0.0145042	0.733843	0.801931	-0.0270414	-0.00113394	0.901388	0.977752
cg13975093	-0.596006	0.551008	0.422847	0.718015	1.02221e-05	0.0367465	chr7	872797	OpenSea	5'UTR;Body	UNC84A;UNC84A						-0.130811	-0.00499928	0.536126	0.83655
cg08776331	-0.597145	0.550381	0.425242	0.712344	5.70008e-06	0.0309644	chr16	2125989	Island	Body;Body;Body	TSC2;TSC2;TSC2		TSC2|7249	-0.245704	4.92873e-09	4.35371e-08	0.1547	0.0135825	0.579088	0.860523
cg14051973	-0.597206	0.550347	0.424277	0.713878	6.82458e-06	0.0328826	chr11	1973545	N_Shore	Body	MRPL23		MRPL23|6150	0.0263628	0.536517	0.631898	-1.19176	-0.0987262	0.00085186	0.00775385
cg14023573	-0.598758	0.549494	0.42317	0.713527	7.04016e-06	0.0328826	chr8	140971379	Island	Body;Body	TRAPPC9;TRAPPC9	TRUE	TRAPPC9|83696	-0.0107907	0.800302	0.856889	0.325784	0.0389757	0.107453	0.332218
cg00731886	-0.606658	0.54517	0.425222	0.698953	1.70929e-06	0.0210705	chr4	1363008	N_Shore	Body	KIAA1530						-0.159801	-0.0123352	0.405493	0.744886
cg22068743	-0.607129	0.544913	0.428854	0.692381	6.75625e-07	0.01203	chr2	238374408	OpenSea			TRUE					-0.136881	-0.00688058	0.445844	0.776668
cg15835852	-0.607236	0.544855	0.413748	0.717506	1.53416e-05	0.0442977	chr22	38299584	N_Shelf								0.467879	0.0456622	0.17275	0.459762
cg02506353	-0.614545	0.540887	0.413934	0.706777	6.71117e-06	0.0328826	chr5	10702346	OpenSea	Body	DAP	TRUE	DAP|1611	-0.307775	1.41481e-13	2.99939e-12	0.02561	0.00158108	0.922235	0.982732
cg12145488	-0.627407	0.533975	0.400745	0.711496	1.83305e-05	0.0477643	chr10	134514630	OpenSea	Body	INPP5A		INPP5A|3632	-0.0100815	0.813177	0.861967	-0.0769394	-0.00189161	0.721055	0.923037
cg18643383	-0.635185	0.529837	0.405771	0.691838	3.06385e-06	0.0260231	chr2	69864882	OpenSea	Body	AAK1	TRUE	AAK1|22848	0.0312246	0.464091	0.565445	-0.228851	-0.0159261	0.26086	0.592888
cg27000934	-0.642095	0.526189	0.392453	0.705499	1.77421e-05	0.04661	chr4	87993109	OpenSea	Body;Body	AFF1;AFF1		AFF1|4299	-0.0590848	0.165673	0.262109	0.0612202	0.00407113	0.792536	0.947002
cg23217940	-0.64624	0.524012	0.391553	0.701282	1.38205e-05	0.0413975	chr15	22954817	OpenSea	Body;TSS1500	CYFIP1;CYFIP1		CYFIP1|23191	-0.138804	0.00107698	0.00299825	0.0600173	0.00564202	0.814418	0.95398
cg09657673	-0.646569	0.52384	0.396714	0.691704	5.14187e-06	0.0289121	chr16	24769827	OpenSea	Body	TNRC6A	TRUE	TNRC6A|27327	0.0172865	0.685294	0.764643	-1.51192	-0.213256	9.19887e-06	0.000224804
cg15348839	-0.65254	0.520721	0.408886	0.663145	1.22498e-07	0.00785221	chr2	232224846	OpenSea			TRUE					0.15747	0.011814	0.526053	0.830456
cg18542050	-0.653411	0.520268	0.40338	0.671026	4.83496e-07	0.00968515	chr12	89986573	OpenSea	Body;Body	ATP2B1;ATP2B1	TRUE	ATP2B1|490	0.0704006	0.0984651	0.168344	-0.451669	-0.0332409	0.0724787	0.249439
cg05972185	-0.660279	0.516707	0.385023	0.69343	1.08671e-05	0.03711	chr16	72972644	OpenSea	Body;Body	ZFHX3;ZFHX3	TRUE	ZFHX3|463	-0.0692179	0.104266	0.175432	-0.947467	-0.0694188	0.00723698	0.0420667
cg04016113	-0.676854	0.508213	0.380703	0.678431	4.38605e-06	0.0275637	chr2	73291377	OpenSea	Body	SFXN5	TRUE	SFXN5|94097	-0.139318	0.00103132	0.00295458	0.187843	0.0110884	0.461137	0.788169
cg04211309	-0.678331	0.507463	0.382855	0.672628	2.377e-06	0.0238074	chr16	58056296	N_Shelf			TRUE					0.218536	0.0383869	0.143152	0.405841
cg19862272	-0.680784	0.50622	0.374706	0.683893	9.18901e-06	0.0367465	chr2	70190733	S_Shelf	TSS1500	ASPRV1		ASPRV1|151516	0.0271706	0.524101	0.624211	-0.83878	-0.132212	0.0123976	0.0642795
cg17876831	-0.686187	0.503492	0.371324	0.682704	1.00156e-05	0.0367465	chr17	18918410	Island	Body;Body	SLC5A10;SLC5A10		SLC5A10|125206	0.241408	9.24023e-09	7.53435e-08	-0.0482464	-0.00093964	0.90356	0.978259
cg27587095	-0.689685	0.501734	0.378715	0.664714	1.54294e-06	0.0197808	chr2	240062186	S_Shore	Body	HDAC4		HDAC4|9759	-0.0509414	0.23212	0.337052	1.53016	0.22215	9.7345e-06	0.000234618
cg23070574	-0.694935	0.499107	0.36307	0.686115	1.86782e-05	0.0478458	chr3	14187308	OpenSea	3'UTR;Body;3'UTR	XPC;XPC;XPC		XPC|7508	-0.0980556	0.021216	0.043248	-0.0338464	-0.00291816	0.876662	0.971543
cg03567939	-0.697526	0.497815	0.370023	0.669742	4.05916e-06	0.0265506	chr7	151506147	OpenSea	5'UTR;Body	PRKAG2;PRKAG2		PRKAG2|51422	0.123932	0.00354099	0.00815968	1.22712	0.0935929	0.000156371	0.00203466
cg00175150	-0.697991	0.497584	0.366723	0.675142	7.3592e-06	0.0333087	chr1	150486261	N_Shore	3'UTR;3'UTR	ECM1;ECM1		ECM1|1893	-0.213683	4.02692e-07	2.5109e-06	0.0870093	-0.00297859	0.75712	0.935685
cg09499965	-0.699982	0.496594	0.379373	0.650035	3.48147e-07	0.00968515	chr7	151220664	S_Shelf								0.496936	0.0579526	0.0128013	0.0659138
cg05508862	-0.700615	0.49628	0.359986	0.684176	1.89589e-05	0.0478458	chr17	18885437	OpenSea	Body;Body;Body	SLC5A10;FAM83G;SLC5A10	TRUE	SLC5A10|125206	0.235782	2.06695e-08	1.36935e-07	0.382938	0.0453093	0.0405531	0.161166
cg05508862	-0.700615	0.49628	0.359986	0.684176	1.89589e-05	0.0478458	chr17	18885437	OpenSea	Body;Body;Body	SLC5A10;FAM83G;SLC5A10	TRUE	FAM83G|644815	0.161039	0.000144804	0.000548185	0.382938	0.0453093	0.0405531	0.161166
cg09863659	-0.700819	0.496179	0.373351	0.659415	1.36924e-06	0.0190802	chr20	30328246	S_Shore	5'UTR	TPX2		TPX2|22974	-0.271906	8.2126e-11	9.67262e-10	0.482631	0.0139371	0.115328	0.349363
cg27659109	-0.703819	0.494692	0.361174	0.67757	1.15922e-05	0.0375287	chr19	3509838	S_Shelf	5'UTR	FZR1		FZR1|51343	-0.133095	0.00172508	0.00435378	-0.51621	-0.0641511	0.0112416	0.0595171
cg19137649	-0.712376	0.490478	0.35811	0.671772	9.0398e-06	0.0367465	chr10	64025887	N_Shelf	Body	RTKN2		RTKN2|219790	-0.0490848	0.249604	0.352773	-0.416581	-0.0580904	0.138593	0.39705
cg04458317	-0.715048	0.489169	0.355997	0.672157	1.03324e-05	0.0367465	chr13	113735558	S_Shelf	Body;Body	MCF2L;MCF2L		MCF2L|23263	0.0347501	0.415165	0.526933
cg17620425	-0.717109	0.488162	0.385479	0.618197	2.6577e-09	0.000425901	chr13	37403552	OpenSea	3'UTR	RFXAP		RFXAP|5994	0.0276417	0.51693	0.622666	0.216177	0.0153264	0.659738	0.898929
cg03092399	-0.717609	0.487918	0.360011	0.661268	3.72078e-06	0.0265506	chr11	108149307	OpenSea	Body	ATM	TRUE	ATM|472	0.106063	0.0126562	0.0273788	-0.288575	-0.0179743	0.192565	0.492871
cg09282946	-0.719206	0.487139	0.353265	0.671747	1.1504e-05	0.0375287	chr22	43551751	S_Shelf	5'UTR;5'UTR	TSPO;TSPO		TSPO|706	-0.154537	0.000267934	0.000916162	0.652656	0.0511166	0.0135314	0.0688629
cg19270469	-0.723535	0.485034	0.358096	0.65697	2.95775e-06	0.0260231	chr11	64023919	N_Shore	Body	PLCB3		PLCB3|5331	-0.00904106	0.832154	0.864788	-0.139241	-0.00170943	0.750976	0.933645
cg05296566	-0.731165	0.481348	0.348867	0.664137	8.51247e-06	0.0363771	chr14	21850196	N_Shore	Body	SUPT16H		SUPT16H|11198	0.0510669	0.23097	0.337052	-0.524754	-0.0493861	0.0915956	0.295948
cg12588208	-0.732375	0.480766	0.35309	0.65461	3.31121e-06	0.0265506	chr3	119547934	OpenSea	Body;Body	GSK3B;GSK3B	TRUE	GSK3B|2932	0.003068	0.942667	0.942667	0.239105	0.0124141	0.32007	0.663438
cg13447284	-0.734966	0.479522	0.349786	0.657377	4.96564e-06	0.0284198	chr17	63116336	N_Shelf								0.166276	0.00813172	0.571968	0.856803
cg06487442	-0.742053	0.476135	0.347059	0.653217	4.2353e-06	0.0271486	chr6	41757330	S_Shore	3'UTR	TOMM6		TOMM6|100188893	0.0433006	0.309866	0.421099	0.193473	0.0113864	0.400824	0.74093
cg22384801	-0.747397	0.473597	0.354132	0.633364	4.6724e-07	0.00968515	chr15	60767308	N_Shelf	5'UTR;Body	NARG2;NARG2		NARG2|79664	0.146768	0.000541803	0.0017356	-0.274449	-0.0210253	0.30482	0.646482
cg12418043	-0.747443	0.473576	0.340028	0.659575	9.77674e-06	0.0367465	chr5	141900671	OpenSea			TRUE					1.14674	0.16843	1.56253e-05	0.000338726
cg19807520	-0.748572	0.473042	0.35223	0.635291	6.51978e-07	0.01203	chr5	178049773	N_Shelf	Body	CLK4		CLK4|57396	0.0452408	0.288667	0.40075	0.140973	0.00577577	0.532223	0.834186
cg09369954	-0.754966	0.470026	0.33221	0.665016	2.00804e-05	0.0486444	chr1	32663763	N_Shelf	3'UTR	TXLNA	TRUE	TXLNA|200081	-0.237159	1.70041e-08	1.20162e-07	0.165335	0.0132994	0.625591	0.883572
cg27458152	-0.78146	0.457737	0.335465	0.624575	8.29142e-07	0.0139865	chr8	22249664	OpenSea	5'UTR;5'UTR;5'UTR;5'UTR	SLC39A14;SLC39A14;SLC39A14;SLC39A14	TRUE	SLC39A14|23516	-0.297703	9.25714e-13	1.4018e-11	-0.0603799	-0.00325047	0.783797	0.944236
cg09150733	-0.79217	0.452861	0.31541	0.650212	1.76749e-05	0.04661	chr7	75984284	N_Shelf	Body	YWHAG		YWHAG|7532	0.00482325	0.909979	0.925057	-0.836022	-0.0535049	0.000374833	0.00405894
cg17074656	-0.795526	0.451344	0.321212	0.634196	4.55873e-06	0.0280979	chr11	63784126	OpenSea	Body	MACROD1		MACROD1|28992	-0.151672	0.000348739	0.0011552	-0.182441	-0.0232248	0.40741	0.746501
cg24150528	-0.796865	0.45074	0.322077	0.630801	3.36968e-06	0.0265506	chr5	43125550	S_Shelf	Body	ZNF131		ZNF131|7690	-0.0542967	0.202759	0.307035	0.0411304	0.00146528	0.815462	0.954319
cg24283662	-0.799846	0.449398	0.326711	0.618156	8.79325e-07	0.0140914	chr3	11519911	OpenSea	Body;Body;Body	ATG7;ATG7;ATG7	TRUE	ATG7|10533	-0.0800865	0.0600588	0.107902	0.0655914	0.00309029	0.78015	0.943063
cg02108731	-0.800522	0.449094	0.318785	0.63267	4.69233e-06	0.0283757	chr22	50297217	OpenSea	3'UTR	ALG12		ALG12|79087	-0.102165	0.0163419	0.0339655	-0.175144	-0.0138327	0.482748	0.802771
cg20208853	-0.816476	0.441987	0.305271	0.639931	1.53178e-05	0.0442977	chr6	31862943	N_Shore	Body;Body	EHMT2;EHMT2		EHMT2|10919	-0.0183952	0.666289	0.759427	0.0443569	0.00212096	0.829491	0.958428
cg06758327	-0.817697	0.441447	0.307851	0.633018	8.73374e-06	0.0367465	chr1	185130427	S_Shelf	Body;Body	C1orf26;C1orf26						0.138819	0.024184	0.522076	0.827899
cg08241401	-0.817853	0.441378	0.314628	0.619192	2.18743e-06	0.0226155	chr20	3824289	N_Shelf								-0.0618303	-0.00397739	0.82402	0.956782
cg08116711	-0.870216	0.418861	0.288489	0.608151	4.7842e-06	0.0283954	chr7	101596218	OpenSea	Body;Body;Body	CUX1;CUX1;CUX1	TRUE	CUX1|1523	-0.0350176	0.411581	0.526933	-1.03647	-0.0803818	2.80988e-05	0.00053383
cg21515785	-0.874173	0.417207	0.287897	0.604596	3.86636e-06	0.0265506	chr5	99886768	OpenSea	Body	FAM174A	TRUE	FAM174A|345757	0.161589	0.000137313	0.000539081	0.00958279	0.000332627	0.9686	0.993462
cg26130023	-0.882082	0.41392	0.279315	0.613392	1.10575e-05	0.03711	chr18	45453609	N_Shelf	5'UTR;5'UTR;5'UTR	SMAD2;SMAD2;SMAD2		SMAD2|4087	0.156362	0.000225964	0.000798405	-0.584828	-0.0501843	0.0256074	0.113207
cg13990980	-0.893653	0.409158	0.279825	0.598269	4.02653e-06	0.0265506	chr14	69891511	OpenSea	Body	SLC39A9	TRUE	SLC39A9|55334	0.0404057	0.343356	0.460706	-0.628842	-0.0552091	0.0331084	0.137972
cg05317956	-0.908395	0.403171	0.270624	0.600636	7.95681e-06	0.034462	chr10	99409824	OpenSea	Body	PI4K2A	TRUE	PI4K2A|55361	-0.146461	0.000556703	0.0017356	-0.526422	-0.0418179	0.0616871	0.221295
cg07145834	-0.913015	0.401312	0.264587	0.60869	1.74118e-05	0.0465046	chr8	123878522	OpenSea	5'UTR	ZHX2	TRUE	ZHX2|22882	0.133855	0.00162189	0.00419317	-0.874015	-0.0962962	0.000278116	0.00320642
cg00731650	-0.919826	0.398588	0.261129	0.608408	2.0186e-05	0.0486444	chr17	80771634	N_Shore	Body	TBCD		TBCD|6904	-0.248728	3.1441e-09	3.02977e-08	0.133927	0.00654348	0.622838	0.882189
cg26789859	-0.921177	0.39805	0.272378	0.581707	1.94662e-06	0.0222821	chr16	81066575	N_Shelf	3'UTR	CENPN		CENPN|55839	-0.127972	0.00259319	0.00624722	0.443573	0.0397912	0.0319036	0.13404
cg08627380	-0.922515	0.397518	0.261294	0.604762	1.63899e-05	0.0452848	chr6	170858811	N_Shelf	Body	PSMB1		PSMB1|5689	0.142029	0.000818828	0.00241099	-0.06033	-0.00300522	0.761476	0.936953
cg03376089	-0.932084	0.393732	0.274745	0.564251	3.83489e-07	0.00968515	chr17	17839409	OpenSea	Body;Body	TOM1L2;TOM1L2	TRUE	TOM1L2|146691	0.169651	6.17754e-05	0.000251853	-0.244428	-0.0201737	0.373937	0.717548
cg03328201	-0.938856	0.391075	0.274128	0.557913	2.231e-07	0.00968515	chr22	22007633	S_Shore	Body	MIR130B						-0.855072	-0.110335	0.0541774	0.200763
cg13899780	-0.992344	0.370707	0.252312	0.544657	4.30008e-07	0.00968515	chr11	70858572	OpenSea	5'UTR	SHANK2		SHANK2|22941	-0.0645899	0.129605	0.208154	0.0547997	0.00350687	0.848612	0.963935
cg05767546	-1.00852	0.364758	0.263512	0.504906	1.20608e-09	0.000386552	chr1	70816768	N_Shelf	Body	ANKRD13C		ANKRD13C|81573	0.00448171	0.91633	0.925057
cg07940428	-1.00985	0.364274	0.246942	0.537356	3.55642e-07	0.00968515	chr4	185378132	S_Shore	5'UTR	IRF2		IRF2|3660	0.0519052	0.223394	0.333517	-0.261708	-0.0277469	0.493392	0.809842
cg19668010	-1.01939	0.360815	0.246085	0.529033	1.78087e-07	0.00951295	chr12	102517154	S_Shelf	5'UTR	C12orf48						0.859373	0.0790969	0.000912539	0.00818134
cg01477253	-1.02268	0.359629	0.237575	0.544388	1.3336e-06	0.0190802	chr2	74885882	S_Shelf	Body	SEMA4F		SEMA4F|10505	0.120225	0.00467652	0.010547	0.330355	0.0277318	0.204815	0.512493
cg19297537	-1.03016	0.356951	0.248322	0.5131	2.63517e-08	0.00211145	chr10	71142369	OpenSea	Body;Body;Body;Body;Body	HK1;HK1;HK1;HK1;HK1		HK1|3098	0.104728	0.0138259	0.0293109	0.0213408	0.000671172	0.917664	0.981537
cg08717931	-1.03099	0.356653	0.234888	0.541538	1.3099e-06	0.0190802	chr1	32617124	OpenSea	Body	KPNA6	TRUE	KPNA6|23633	0.068434	0.108258	0.179302	-1.04206	-0.106169	0.000483762	0.00496386
cg09472928	-1.07004	0.342994	0.215327	0.546354	6.64346e-06	0.0328826	chr5	175393743	N_Shore	Body	THOC3		THOC3|84321	-0.193384	4.72917e-06	2.35192e-05	0.233031	0.0125607	0.403245	0.742909
cg08878651	-1.08092	0.339282	0.235893	0.487984	5.57687e-09	0.000595803	chr17	30066757	OpenSea			TRUE					-0.171639	-0.00689634	0.440407	0.772503
cg04205653	-1.18641	0.305315	0.18547	0.502602	3.08539e-06	0.0260231	chr21	46225890	S_Shelf	3'UTR	SUMO3		SUMO3|6612	-0.0875987	0.0396483	0.0764131	-0.220326	-0.0314932	0.233821	0.555987

## Sheet: TAM
Additional file 4 – Results of single-locus survival analysis, TAM cohort
Annotation based on IlluminaHumanMethylation450kanno.ilmn12.hg19 R package
HR			Hazard ratio
CI			Confidence interval
Adj. P-value			Benjamini-Hochberg adjusted P-value
pos			Position on the chromosome (indicated in column 'chr')
Gene			Gene symbol | Entrez Gene ID
Correlation coefficient			Pearson correlation between gene expression and methylation profiles
P-value (corr.)			Pearson correlation test P-value
Adj. P-value (corr.)			Benjamini-Hochberg adjusted P-value for correlation test
log2FC (M7 vs. WT)			Log2 fold change of methylation at month 7 versus WT
Delta beta (M7 vs. WT)			Methylation beta value difference
P-Value (M7 vs. WT)			P-value of differential methylation test
Adj. P-value (M7 vs. WT)			Benjamini-Hochberg adjusted P-value of differential methylation test
CpG ID	log(HR)	HR	CI (lo 95)	CI (hi 95)	P-value	Adj. P-value	chr	pos	Relation_to_Island	UCSC_RefGene_Group	UCSC_RefGene_Name	Enhancer	Gene	Correlation coefficient	P-value (corr.)	Adj. P-value (corr.)	log2FC (M7 vs. WT)	Delta beta (M7 vs. WT)	P-Value (M7 vs. WT)	Adj. P-value (M7 vs. WT)
cg07244783	-1.00934	0.364458	0.250285	0.530714	1.40942e-07	0.0150574	chr4	4432211	OpenSea	Body	STX18	TRUE	STX18|53407	0.127408	0.0958031	0.119754	-0.503228	-0.0281151	0.10679	0.316825
cg02506353	-1.22087	0.294975	0.182041	0.47797	7.13494e-07	0.0457356	chr5	10702346	OpenSea	Body	DAP	TRUE	DAP|1611	-0.214702	0.00467942	0.0116986	-0.00701393	0.000106764	0.982386	0.997661
cg23217940	-1.4849	0.226524	0.133858	0.383342	3.16211e-08	0.0101347	chr15	22954817	OpenSea	Body;TSS1500	CYFIP1;CYFIP1		CYFIP1|23191	-0.178336	0.0192528	0.032088	0.0384621	0.00383813	0.901116	0.985905
cg03376089	-1.68389	0.18565	0.0983552	0.350423	2.04543e-07	0.0163892	chr17	17839409	OpenSea	Body;Body	TOM1L2;TOM1L2	TRUE	TOM1L2|146691	0.266032	0.000419804	0.00209902	-0.647122	-0.0481839	0.0575894	0.195491
cg12218895	-1.70876	0.18109	0.09714	0.337591	7.56755e-08	0.0121271	chr20	3898940	OpenSea	Body;TSS1500;Body;Body	PANK2;MIR103-2AS;PANK2;PANK2	TRUE	PANK2|80025	-0.0999582	0.192012	0.192012	-0.843917	-0.0627833	0.0247717	0.0986628

## Sheet: AI
Additional file 4 – Results of single-locus survival analysis, AI cohort
Annotation based on IlluminaHumanMethylation450kanno.ilmn12.hg19 R package
HR			Hazard ratio
CI			Confidence interval
Adj. P-value			Benjamini-Hochberg adjusted P-value
pos			Position on the chromosome (indicated in column 'chr')
Gene			Gene symbol | Entrez Gene ID
Correlation coefficient			Pearson correlation between gene expression and methylation profiles
P-value (corr.)			Pearson correlation test P-value
Adj. P-value (corr.)			Benjamini-Hochberg adjusted P-value for correlation test
log2FC (M7 vs. WT)			Log2 fold change of methylation at month 7 versus WT
Delta beta (M7 vs. WT)			Methylation beta value difference
P-Value (M7 vs. WT)			P-value of differential methylation test
Adj. P-value (M7 vs. WT)			Benjamini-Hochberg adjusted P-value of differential methylation test
CpG ID	log(HR)	HR	CI (lo 95)	CI (hi 95)	P-value	Adj. P-value	chr	pos	Relation_to_Island	UCSC_RefGene_Group	UCSC_RefGene_Name	Enhancer	Gene	Correlation coefficient	P-value (corr.)	Adj. P-value (corr.)	log2FC (M7 vs. WT)	Delta beta (M7 vs. WT)	P-Value (M7 vs. WT)	Adj. P-value (M7 vs. WT)
cg00435408	-1.33928	0.262034	0.162626	0.422208	3.74e-08	0.0119838	chr16	57220662	S_Shore	TSS1500;5'UTR	FAM192A;RSPRY1		RSPRY1|89970	-0.138788	0.0445415	0.0445415	0.127496	0.00374582	0.554718	0.89602
cg00435408	-1.33928	0.262034	0.162626	0.422208	3.74e-08	0.0119838	chr16	57220662	S_Shore	TSS1500;5'UTR	FAM192A;RSPRY1		FAM192A|80011	-0.248563	0.000275005	0.000550011	0.127496	0.00374582	0.554718	0.89602
