# Supplementary material for: Candidate methylation sites associated with endocrine therapy resistance in ER+/HER2- breast cancer
Source: BMC Cancer. 2020 Jul 19;20:676. doi: 10.1186/s12885-020-07100-z (PMC7368985; doi:10.1186/s12885-020-07100-z)
Supplement: Supplementary file 7 — Additional file 7. Multi-locus survival analysis. Results of multi-locus survival analysis on ER+/HER2-, TAM and AI cohorts. For each CpG the results of the correlation analysis and of the differential methylation analysis of month 7 versus WT in the T47D RA experiment are also included. [file 12885_2020_7100_MOESM7_ESM.xlsx]

## Sheet: ER+HER2-
Additional file 7 – Results of multi-locus survival analysis, ER+/HER2- cohort
Annotation based on IlluminaHumanMethylation450kanno.ilmn12.hg19 R package
pos			Position on the chromosome (indicated in column 'chr')
Gene			Gene symbol | Entrez Gene ID
Correlation coefficient			Pearson correlation between gene expression and methylation profiles
P-value (corr.)			Pearson correlation test P-value
Adj. P-value (corr.)			Benjamini-Hochberg adjusted P-value for correlation test
log2FC (M7 vs. WT)			Log2 fold change of methylation at month 7 versus WT
Delta beta (M7 vs. WT)			Methylation beta value difference
P-Value (M7 vs. WT)			P-value of differential methylation test
Adj. P-value (M7 vs. WT)			Benjamini-Hochberg adjusted P-value of differential methylation test
CpG ID	Coefficient	chr	pos	Relation_to_Island	UCSC_RefGene_Group	UCSC_RefGene_Name	Enhancer	Gene	Correlation coefficient	P-value (corr.)	Adj. P-value (corr.)	log2FC (M7 vs. WT)	Delta beta (M7 vs. WT)	P-Value (M7 vs. WT)	Adj. P-value (M7 vs. WT)
cg13792075	0.0508545	chr3	183735803	Island	TSS200;TSS200	ABCC5;ABCC5		ABCC5|10057	0.0626241	0.141713	0.195392	-0.144832	-0.0029798	0.702771	0.916123
cg20036377	0.0319492	chr8	25230064	OpenSea	Body	DOCK5		DOCK5|80005	0.424824	1.34701e-25	2.45155e-24	0.10667	0.0103755	0.710064	0.918902
cg18825927	0.0282592	chr11	67211308	OpenSea	TSS200;TSS1500	CORO1B;CORO1B		CORO1B|57175	-0.229053	5.27325e-08	2.39933e-07	0.109323	0.0018278	0.569907	0.855647
cg09551172	0.0178353	chr1	100315427	Island	TSS1500;TSS1500;TSS1500;TSS1500;TSS1500	AGL;AGL;AGL;AGL;AGL		AGL|178	-0.166074	8.84498e-05	0.000220519	0.0164924	0.000254083	0.936151	0.986237
cg22660447	0.014522	chr16	89778660	Island	Body	C16orf7	TRUE					-0.318112	-0.0166809	0.15754	0.432729
cg11789421	0.0144841	chr10	103543213	Island	TSS200	NPM3		NPM3|10360	-0.311868	6.45741e-14	4.89687e-13	-0.112672	-0.00292795	0.752343	0.934104
cg20835789	0.013254	chr3	15469053	Island	TSS200;TSS200	METTL6;EAF1		EAF1|85403	-0.0678122	0.111509	0.161069	0.0287258	0.000431141	0.851888	0.96489
cg20835789	0.013254	chr3	15469053	Island	TSS200;TSS200	METTL6;EAF1		METTL6|131965	-0.0687664	0.10655	0.155137	0.0287258	0.000431141	0.851888	0.96489
cg14744828	0.0129172	chr13	110790404	N_Shore								0.144978	0.00252414	0.571217	0.856376
cg04974913	0.0124337	chr1	13839662	Island								-0.206362	-0.00826696	0.620707	0.881108
cg21672339	0.0123794	chr12	49319475	Island	TSS200;TSS1500;TSS200	FKBP11;FKBP11;FKBP11	TRUE	FKBP11|51303	-0.193094	4.8895e-06	1.67903e-05	0.0263449	0.00125977	0.932712	0.985473
cg13620051	0.0121208	chr9	126759535	N_Shelf								-0.549145	-0.0930392	0.00801721	0.0455897
cg13476077	0.0116753	chr1	200009373	N_Shore	Body;Body	NR5A2;NR5A2		NR5A2|2494	-0.0662049	0.12027	0.168861	-1.33165	-0.195851	0.000131431	0.00177511
cg20074395	0.011664	chr20	1246715	Island	TSS1500	SNPH		SNPH|9751	-0.428881	4.16429e-26	8.42112e-25	0.359254	0.0121655	0.515885	0.824058
cg13085895	0.0112245	chr12	7047250	Island	Body;Body	ATN1;ATN1	TRUE	ATN1|1822	0.0229743	0.590148	0.654921	0.316101	0.00578755	0.186385	0.482739
cg26968387	0.0110537	chr19	37569268	Island	TSS200	ZNF420		ZNF420|147923	-0.110058	0.00965944	0.0179843	0.128872	0.00178833	0.499525	0.813787
cg07420163	0.0109569	chr16	89778301	Island	Body	C16orf7	TRUE					0.14584	0.00237488	0.547159	0.842849
cg18394118	0.0102304	chr12	102270878	Island	TSS1500	DRAM1		DRAM1|55332	-0.0952338	0.0252535	0.0425569	0.00874738	0.000270931	0.975536	0.994918
cg06472065	0.0101555	chr6	33394446	N_Shore	Body	SYNGAP1		SYNGAP1|8831	-0.00527429	0.901602	0.921863	-1.01772	-0.0396863	0.0243786	0.109025
cg09317884	0.00976143	chr1	165204512	Island	Body	LMX1A	TRUE	LMX1A|4009	0.0136882	0.748296	0.787225	-0.52322	-0.0893038	0.0691719	0.24096
cg14451276	0.00953019	chr7	36764019	OpenSea	1stExon;5'UTR	AOAH;AOAH		AOAH|313	-0.391885	1.04991e-21	1.19427e-20	1.58562	0.0849889	1.46309e-05	0.000321987
cg05425213	0.00940535	chr11	124616208	Island	3'UTR;3'UTR	NRGN;NRGN		NRGN|4900	0.0539448	0.205705	0.273272	0.128987	0.022425	0.491206	0.808473
cg00120948	0.00914759	chr1	8484417	S_Shore	Body;TSS1500;Body	RERE;RERE;RERE		RERE|473	-0.109081	0.0103275	0.018986	-1.58643	-0.26408	0.0231616	0.104771
cg15925090	0.00884775	chr4	4874042	Island			TRUE					-1.1765	-0.189534	0.00402343	0.0265006
cg00587042	0.00868963	chr7	42927968	OpenSea			TRUE					-0.109434	-0.00742497	0.679909	0.907309
cg14627760	0.00858921	chr17	79860435	Island	Body	NPB	TRUE	NPB|256933	-0.0442323	0.299561	0.373425	-1.42578	-0.155829	0.00333871	0.0228683
cg02021606	0.00836384	chr21	44845925	OpenSea	Body	SIK1		SIK1|150094	-0.176977	2.89399e-05	8.49525e-05	0.0168687	0.000585986	0.944846	0.988245
cg22914729	0.00778354	chr4	111541339	N_Shore	Body;Body;Body	PITX2;PITX2;PITX2		PITX2|5308	0.161428	0.000139472	0.000338451	-1.52656	-0.233839	0.000126874	0.00172716
cg08138685	0.0074739	chr2	119610526	N_Shore								-0.116928	-0.00392798	0.745606	0.931858
cg15205204	0.00742678	chr1	6545172	Island	5'UTR;5'UTR;Body;5'UTR;Body	PLEKHG5;PLEKHG5;PLEKHG5;PLEKHG5;PLEKHG5		PLEKHG5|57449	-0.263018	3.46589e-10	2.03481e-09	0.839423	0.0247522	0.108008	0.333402
cg25132257	0.00706815	chr11	112916139	OpenSea	Body;Body;Body	NCAM1;NCAM1;NCAM1		NCAM1|4684	0.196271	3.382e-06	1.23105e-05	-0.232471	-0.0123945	0.596092	0.869106
cg12379948	0.00697162	chr17	44896424	Island	TSS1500	WNT3	TRUE	WNT3|7473	-0.073538	0.0843162	0.12788	1.50519	0.227049	4.97751e-06	0.000140101
cg15481636	0.00646408	chr1	228646970	S_Shore	TSS1500	HIST3H2A		HIST3H2A|92815	-0.624491	5.04311e-61	4.58923e-59	0.217435	0.0035537	0.148299	0.415629
cg04053242	0.00629164	chr20	1246772	Island	TSS200	SNPH		SNPH|9751	-0.416787	1.31588e-24	1.84224e-23	0.103406	0.0209984	0.818124	0.955086
cg17222164	0.00601385	chr17	43339476	Island	Body;TSS200;1stExon;5'UTR	LOC100133991;LOC100133991;C17orf46;C17orf46	TRUE					-0.460213	-0.022612	0.0660602	0.232854
cg01169021	0.00591151	chr5	140792918	N_Shore	Body;Body;Body;Body;Body;Body;Body;1stExon;Body;Body;1stExon;Body;Body;Body;Body;Body;Body	PCDHGA4;PCDHGA6;PCDHGA9;PCDHGA1;PCDHGA8;PCDHGA5;PCDHGB1;PCDHGA10;PCDHGB4;PCDHGA3;PCDHGA10;PCDHGA2;PCDHGB6;PCDHGA7;PCDHGB2;PCDHGB5;PCDHGB3		PCDHGA7|56108	0.0370253	0.385272	0.470601	0.306856	0.0083251	0.474538	0.797242
cg01169021	0.00591151	chr5	140792918	N_Shore	Body;Body;Body;Body;Body;Body;Body;1stExon;Body;Body;1stExon;Body;Body;Body;Body;Body;Body	PCDHGA4;PCDHGA6;PCDHGA9;PCDHGA1;PCDHGA8;PCDHGA5;PCDHGB1;PCDHGA10;PCDHGB4;PCDHGA3;PCDHGA10;PCDHGA2;PCDHGB6;PCDHGA7;PCDHGB2;PCDHGB5;PCDHGB3		PCDHGB4|8641	0.0311751	0.464799	0.549308	0.306856	0.0083251	0.474538	0.797242
cg01169021	0.00591151	chr5	140792918	N_Shore	Body;Body;Body;Body;Body;Body;Body;1stExon;Body;Body;1stExon;Body;Body;Body;Body;Body;Body	PCDHGA4;PCDHGA6;PCDHGA9;PCDHGA1;PCDHGA8;PCDHGA5;PCDHGB1;PCDHGA10;PCDHGB4;PCDHGA3;PCDHGA10;PCDHGA2;PCDHGB6;PCDHGA7;PCDHGB2;PCDHGB5;PCDHGB3		PCDHGA9|56107	-0.0725164	0.0887314	0.13237	0.306856	0.0083251	0.474538	0.797242
cg01169021	0.00591151	chr5	140792918	N_Shore	Body;Body;Body;Body;Body;Body;Body;1stExon;Body;Body;1stExon;Body;Body;Body;Body;Body;Body	PCDHGA4;PCDHGA6;PCDHGA9;PCDHGA1;PCDHGA8;PCDHGA5;PCDHGB1;PCDHGA10;PCDHGB4;PCDHGA3;PCDHGA10;PCDHGA2;PCDHGB6;PCDHGA7;PCDHGB2;PCDHGB5;PCDHGB3		PCDHGA4|56111	0.0517556	0.224733	0.296387	0.306856	0.0083251	0.474538	0.797242
cg01169021	0.00591151	chr5	140792918	N_Shore	Body;Body;Body;Body;Body;Body;Body;1stExon;Body;Body;1stExon;Body;Body;Body;Body;Body;Body	PCDHGA4;PCDHGA6;PCDHGA9;PCDHGA1;PCDHGA8;PCDHGA5;PCDHGB1;PCDHGA10;PCDHGB4;PCDHGA3;PCDHGA10;PCDHGA2;PCDHGB6;PCDHGA7;PCDHGB2;PCDHGB5;PCDHGB3		PCDHGB1|56104	0.116333	0.00621324	0.0121592	0.306856	0.0083251	0.474538	0.797242
cg01169021	0.00591151	chr5	140792918	N_Shore	Body;Body;Body;Body;Body;Body;Body;1stExon;Body;Body;1stExon;Body;Body;Body;Body;Body;Body	PCDHGA4;PCDHGA6;PCDHGA9;PCDHGA1;PCDHGA8;PCDHGA5;PCDHGB1;PCDHGA10;PCDHGB4;PCDHGA3;PCDHGA10;PCDHGA2;PCDHGB6;PCDHGA7;PCDHGB2;PCDHGB5;PCDHGB3		PCDHGB3|56102	0.0162521	0.703206	0.750999	0.306856	0.0083251	0.474538	0.797242
cg01169021	0.00591151	chr5	140792918	N_Shore	Body;Body;Body;Body;Body;Body;Body;1stExon;Body;Body;1stExon;Body;Body;Body;Body;Body;Body	PCDHGA4;PCDHGA6;PCDHGA9;PCDHGA1;PCDHGA8;PCDHGA5;PCDHGB1;PCDHGA10;PCDHGB4;PCDHGA3;PCDHGA10;PCDHGA2;PCDHGB6;PCDHGA7;PCDHGB2;PCDHGB5;PCDHGB3		PCDHGA8|9708	0.00678019	0.873717	0.898398	0.306856	0.0083251	0.474538	0.797242
cg01169021	0.00591151	chr5	140792918	N_Shore	Body;Body;Body;Body;Body;Body;Body;1stExon;Body;Body;1stExon;Body;Body;Body;Body;Body;Body	PCDHGA4;PCDHGA6;PCDHGA9;PCDHGA1;PCDHGA8;PCDHGA5;PCDHGB1;PCDHGA10;PCDHGB4;PCDHGA3;PCDHGA10;PCDHGA2;PCDHGB6;PCDHGA7;PCDHGB2;PCDHGB5;PCDHGB3		PCDHGA2|56113	-0.016114	0.705609	0.750999	0.306856	0.0083251	0.474538	0.797242
cg01169021	0.00591151	chr5	140792918	N_Shore	Body;Body;Body;Body;Body;Body;Body;1stExon;Body;Body;1stExon;Body;Body;Body;Body;Body;Body	PCDHGA4;PCDHGA6;PCDHGA9;PCDHGA1;PCDHGA8;PCDHGA5;PCDHGB1;PCDHGA10;PCDHGB4;PCDHGA3;PCDHGA10;PCDHGA2;PCDHGB6;PCDHGA7;PCDHGB2;PCDHGB5;PCDHGB3		PCDHGA5|56110	0.015106	0.723244	0.765293	0.306856	0.0083251	0.474538	0.797242
cg01169021	0.00591151	chr5	140792918	N_Shore	Body;Body;Body;Body;Body;Body;Body;1stExon;Body;Body;1stExon;Body;Body;Body;Body;Body;Body	PCDHGA4;PCDHGA6;PCDHGA9;PCDHGA1;PCDHGA8;PCDHGA5;PCDHGB1;PCDHGA10;PCDHGB4;PCDHGA3;PCDHGA10;PCDHGA2;PCDHGB6;PCDHGA7;PCDHGB2;PCDHGB5;PCDHGB3		PCDHGA3|56112	0.0251767	0.555008	0.619703	0.306856	0.0083251	0.474538	0.797242
cg01169021	0.00591151	chr5	140792918	N_Shore	Body;Body;Body;Body;Body;Body;Body;1stExon;Body;Body;1stExon;Body;Body;Body;Body;Body;Body	PCDHGA4;PCDHGA6;PCDHGA9;PCDHGA1;PCDHGA8;PCDHGA5;PCDHGB1;PCDHGA10;PCDHGB4;PCDHGA3;PCDHGA10;PCDHGA2;PCDHGB6;PCDHGA7;PCDHGB2;PCDHGB5;PCDHGB3		PCDHGA1|56114	0.105089	0.0135011	0.0243286	0.306856	0.0083251	0.474538	0.797242
cg01169021	0.00591151	chr5	140792918	N_Shore	Body;Body;Body;Body;Body;Body;Body;1stExon;Body;Body;1stExon;Body;Body;Body;Body;Body;Body	PCDHGA4;PCDHGA6;PCDHGA9;PCDHGA1;PCDHGA8;PCDHGA5;PCDHGB1;PCDHGA10;PCDHGB4;PCDHGA3;PCDHGA10;PCDHGA2;PCDHGB6;PCDHGA7;PCDHGB2;PCDHGB5;PCDHGB3		PCDHGA10|56106	-0.359014	3.09878e-18	2.68561e-17	0.306856	0.0083251	0.474538	0.797242
cg01169021	0.00591151	chr5	140792918	N_Shore	Body;Body;Body;Body;Body;Body;Body;1stExon;Body;Body;1stExon;Body;Body;Body;Body;Body;Body	PCDHGA4;PCDHGA6;PCDHGA9;PCDHGA1;PCDHGA8;PCDHGA5;PCDHGB1;PCDHGA10;PCDHGB4;PCDHGA3;PCDHGA10;PCDHGA2;PCDHGB6;PCDHGA7;PCDHGB2;PCDHGB5;PCDHGB3		PCDHGA6|56109	-0.0378172	0.375183	0.461374	0.306856	0.0083251	0.474538	0.797242
cg01169021	0.00591151	chr5	140792918	N_Shore	Body;Body;Body;Body;Body;Body;Body;1stExon;Body;Body;1stExon;Body;Body;Body;Body;Body;Body	PCDHGA4;PCDHGA6;PCDHGA9;PCDHGA1;PCDHGA8;PCDHGA5;PCDHGB1;PCDHGA10;PCDHGB4;PCDHGA3;PCDHGA10;PCDHGA2;PCDHGB6;PCDHGA7;PCDHGB2;PCDHGB5;PCDHGB3		PCDHGB2|56103	0.0573103	0.178774	0.239241	0.306856	0.0083251	0.474538	0.797242
cg01169021	0.00591151	chr5	140792918	N_Shore	Body;Body;Body;Body;Body;Body;Body;1stExon;Body;Body;1stExon;Body;Body;Body;Body;Body;Body	PCDHGA4;PCDHGA6;PCDHGA9;PCDHGA1;PCDHGA8;PCDHGA5;PCDHGB1;PCDHGA10;PCDHGB4;PCDHGA3;PCDHGA10;PCDHGA2;PCDHGB6;PCDHGA7;PCDHGB2;PCDHGB5;PCDHGB3		PCDHGB6|56100	-0.00924253	0.828471	0.86161	0.306856	0.0083251	0.474538	0.797242
cg00388195	0.00540783	chr7	96647323	S_Shore								-1.18741	-0.103179	0.00518505	0.0323466
cg23057009	0.00505631	chr10	134844217	N_Shore								0.126542	0.01977	0.601617	0.871892
cg00013015	0.00494341	chr6	33866316	OpenSea								0.701106	0.115225	0.00786629	0.0449074
cg08128789	0.00467069	chr1	89989925	Island	TSS1500	LRRC8B		LRRC8B|23507	0.0293123	0.491913	0.573899	-0.405698	-0.00749966	0.205743	0.513934
cg18245631	0.0046096	chr14	90422776	S_Shore	5'UTR;5'UTR	TDP1;TDP1		TDP1|55775	-0.000125139	0.997659	0.997659
cg19200285	0.00460031	chr12	2800755	Island	3'UTR;3'UTR;3'UTR;3'UTR;3'UTR;3'UTR;3'UTR;3'UTR;3'UTR;3'UTR;3'UTR;3'UTR;3'UTR;3'UTR;3'UTR;3'UTR;3'UTR;3'UTR;3'UTR;3'UTR;3'UTR;3'UTR;3'UTR	CACNA1C;CACNA1C;CACNA1C;CACNA1C;CACNA1C;CACNA1C;CACNA1C;CACNA1C;CACNA1C;CACNA1C;CACNA1C;CACNA1C;CACNA1C;CACNA1C;CACNA1C;CACNA1C;CACNA1C;CACNA1C;CACNA1C;CACNA1C;CACNA1C;CACNA1C;CACNA1C		CACNA1C|775	0.262331	3.86532e-10	2.1984e-09	-0.127764	-0.0209876	0.60681	0.874483
cg15936999	0.00443797	chr17	73840853	OpenSea	TSS200	UNC13D	TRUE	UNC13D|201294	-0.373022	1.15015e-19	1.04664e-18	0.098604	0.00141929	0.542897	0.840544
cg21763211	0.00442767	chr19	12932850	N_Shelf								-0.470932	-0.0384247	0.266786	0.600668
cg05873146	0.0044194	chr17	29335669	Island
cg16927285	0.00425973	chr3	62128744	OpenSea	Body	PTPRG	TRUE	PTPRG|5793	0.175489	3.38444e-05	9.6245e-05	0.751135	0.086632	0.0407806	0.161857
cg00467529	0.00409052	chr11	117857293	Island	Body;Body	IL10RA;IL10RA	TRUE	IL10RA|3587	-0.13087	0.00206276	0.00436537	-2.61868	-0.181545	8.61364e-08	6.66057e-06
cg12975295	0.00387848	chr9	86571409	Island	1stExon	C9orf64	TRUE	C9orf64|84267	-0.0913405	0.0319019	0.0518406
cg26039926	0.00376357	chrX	40945750	S_Shore	5'UTR;5'UTR	USP9X;USP9X		USP9X|8239	-0.120146	0.00470386	0.00940772	0.0168237	0.00336409	0.960341	0.991714
cg25353450	0.0036229	chr5	140792511	N_Shore	Body;Body;Body;Body;Body;TSS1500;Body;Body;TSS1500;Body;Body;Body;Body;Body;Body;Body;Body	PCDHGA4;PCDHGA6;PCDHGA9;PCDHGA1;PCDHGA8;PCDHGA10;PCDHGA5;PCDHGB1;PCDHGA10;PCDHGB4;PCDHGA3;PCDHGA2;PCDHGB6;PCDHGA7;PCDHGB2;PCDHGB5;PCDHGB3		PCDHGA10|56106	-0.207161	9.13047e-07	3.46197e-06	0.188395	0.00446808	0.639973	0.890371
cg25353450	0.0036229	chr5	140792511	N_Shore	Body;Body;Body;Body;Body;TSS1500;Body;Body;TSS1500;Body;Body;Body;Body;Body;Body;Body;Body	PCDHGA4;PCDHGA6;PCDHGA9;PCDHGA1;PCDHGA8;PCDHGA10;PCDHGA5;PCDHGB1;PCDHGA10;PCDHGB4;PCDHGA3;PCDHGA2;PCDHGB6;PCDHGA7;PCDHGB2;PCDHGB5;PCDHGB3		PCDHGA3|56112	0.116614	0.0060889	0.0120454	0.188395	0.00446808	0.639973	0.890371
cg25353450	0.0036229	chr5	140792511	N_Shore	Body;Body;Body;Body;Body;TSS1500;Body;Body;TSS1500;Body;Body;Body;Body;Body;Body;Body;Body	PCDHGA4;PCDHGA6;PCDHGA9;PCDHGA1;PCDHGA8;PCDHGA10;PCDHGA5;PCDHGB1;PCDHGA10;PCDHGB4;PCDHGA3;PCDHGA2;PCDHGB6;PCDHGA7;PCDHGB2;PCDHGB5;PCDHGB3		PCDHGA8|9708	0.114932	0.00686915	0.0131598	0.188395	0.00446808	0.639973	0.890371
cg25353450	0.0036229	chr5	140792511	N_Shore	Body;Body;Body;Body;Body;TSS1500;Body;Body;TSS1500;Body;Body;Body;Body;Body;Body;Body;Body	PCDHGA4;PCDHGA6;PCDHGA9;PCDHGA1;PCDHGA8;PCDHGA10;PCDHGA5;PCDHGB1;PCDHGA10;PCDHGB4;PCDHGA3;PCDHGA2;PCDHGB6;PCDHGA7;PCDHGB2;PCDHGB5;PCDHGB3		PCDHGB1|56104	0.23948	1.22033e-08	6.16945e-08	0.188395	0.00446808	0.639973	0.890371
cg25353450	0.0036229	chr5	140792511	N_Shore	Body;Body;Body;Body;Body;TSS1500;Body;Body;TSS1500;Body;Body;Body;Body;Body;Body;Body;Body	PCDHGA4;PCDHGA6;PCDHGA9;PCDHGA1;PCDHGA8;PCDHGA10;PCDHGA5;PCDHGB1;PCDHGA10;PCDHGB4;PCDHGA3;PCDHGA2;PCDHGB6;PCDHGA7;PCDHGB2;PCDHGB5;PCDHGB3		PCDHGA4|56111	0.137214	0.00123016	0.00263399	0.188395	0.00446808	0.639973	0.890371
cg25353450	0.0036229	chr5	140792511	N_Shore	Body;Body;Body;Body;Body;TSS1500;Body;Body;TSS1500;Body;Body;Body;Body;Body;Body;Body;Body	PCDHGA4;PCDHGA6;PCDHGA9;PCDHGA1;PCDHGA8;PCDHGA10;PCDHGA5;PCDHGB1;PCDHGA10;PCDHGB4;PCDHGA3;PCDHGA2;PCDHGB6;PCDHGA7;PCDHGB2;PCDHGB5;PCDHGB3		PCDHGB3|56102	0.156086	0.000231891	0.000548106	0.188395	0.00446808	0.639973	0.890371
cg25353450	0.0036229	chr5	140792511	N_Shore	Body;Body;Body;Body;Body;TSS1500;Body;Body;TSS1500;Body;Body;Body;Body;Body;Body;Body;Body	PCDHGA4;PCDHGA6;PCDHGA9;PCDHGA1;PCDHGA8;PCDHGA10;PCDHGA5;PCDHGB1;PCDHGA10;PCDHGB4;PCDHGA3;PCDHGA2;PCDHGB6;PCDHGA7;PCDHGB2;PCDHGB5;PCDHGB3		PCDHGB2|56103	0.175306	3.45005e-05	9.66013e-05	0.188395	0.00446808	0.639973	0.890371
cg25353450	0.0036229	chr5	140792511	N_Shore	Body;Body;Body;Body;Body;TSS1500;Body;Body;TSS1500;Body;Body;Body;Body;Body;Body;Body;Body	PCDHGA4;PCDHGA6;PCDHGA9;PCDHGA1;PCDHGA8;PCDHGA10;PCDHGA5;PCDHGB1;PCDHGA10;PCDHGB4;PCDHGA3;PCDHGA2;PCDHGB6;PCDHGA7;PCDHGB2;PCDHGB5;PCDHGB3		PCDHGA9|56107	0.0453711	0.287278	0.360584	0.188395	0.00446808	0.639973	0.890371
cg25353450	0.0036229	chr5	140792511	N_Shore	Body;Body;Body;Body;Body;TSS1500;Body;Body;TSS1500;Body;Body;Body;Body;Body;Body;Body;Body	PCDHGA4;PCDHGA6;PCDHGA9;PCDHGA1;PCDHGA8;PCDHGA10;PCDHGA5;PCDHGB1;PCDHGA10;PCDHGB4;PCDHGA3;PCDHGA2;PCDHGB6;PCDHGA7;PCDHGB2;PCDHGB5;PCDHGB3		PCDHGA2|56113	0.0935753	0.0279232	0.046624	0.188395	0.00446808	0.639973	0.890371
cg25353450	0.0036229	chr5	140792511	N_Shore	Body;Body;Body;Body;Body;TSS1500;Body;Body;TSS1500;Body;Body;Body;Body;Body;Body;Body;Body	PCDHGA4;PCDHGA6;PCDHGA9;PCDHGA1;PCDHGA8;PCDHGA10;PCDHGA5;PCDHGB1;PCDHGA10;PCDHGB4;PCDHGA3;PCDHGA2;PCDHGB6;PCDHGA7;PCDHGB2;PCDHGB5;PCDHGB3		PCDHGB6|56100	0.0902248	0.0340633	0.0548631	0.188395	0.00446808	0.639973	0.890371
cg25353450	0.0036229	chr5	140792511	N_Shore	Body;Body;Body;Body;Body;TSS1500;Body;Body;TSS1500;Body;Body;Body;Body;Body;Body;Body;Body	PCDHGA4;PCDHGA6;PCDHGA9;PCDHGA1;PCDHGA8;PCDHGA10;PCDHGA5;PCDHGB1;PCDHGA10;PCDHGB4;PCDHGA3;PCDHGA2;PCDHGB6;PCDHGA7;PCDHGB2;PCDHGB5;PCDHGB3		PCDHGB4|8641	0.182763	1.55559e-05	4.88135e-05	0.188395	0.00446808	0.639973	0.890371
cg25353450	0.0036229	chr5	140792511	N_Shore	Body;Body;Body;Body;Body;TSS1500;Body;Body;TSS1500;Body;Body;Body;Body;Body;Body;Body;Body	PCDHGA4;PCDHGA6;PCDHGA9;PCDHGA1;PCDHGA8;PCDHGA10;PCDHGA5;PCDHGB1;PCDHGA10;PCDHGB4;PCDHGA3;PCDHGA2;PCDHGB6;PCDHGA7;PCDHGB2;PCDHGB5;PCDHGB3		PCDHGA5|56110	0.125607	0.00311538	0.00644317	0.188395	0.00446808	0.639973	0.890371
cg25353450	0.0036229	chr5	140792511	N_Shore	Body;Body;Body;Body;Body;TSS1500;Body;Body;TSS1500;Body;Body;Body;Body;Body;Body;Body;Body	PCDHGA4;PCDHGA6;PCDHGA9;PCDHGA1;PCDHGA8;PCDHGA10;PCDHGA5;PCDHGB1;PCDHGA10;PCDHGB4;PCDHGA3;PCDHGA2;PCDHGB6;PCDHGA7;PCDHGB2;PCDHGB5;PCDHGB3		PCDHGA7|56108	0.155103	0.000254193	0.000593117	0.188395	0.00446808	0.639973	0.890371
cg25353450	0.0036229	chr5	140792511	N_Shore	Body;Body;Body;Body;Body;TSS1500;Body;Body;TSS1500;Body;Body;Body;Body;Body;Body;Body;Body	PCDHGA4;PCDHGA6;PCDHGA9;PCDHGA1;PCDHGA8;PCDHGA10;PCDHGA5;PCDHGB1;PCDHGA10;PCDHGB4;PCDHGA3;PCDHGA2;PCDHGB6;PCDHGA7;PCDHGB2;PCDHGB5;PCDHGB3		PCDHGA1|56114	0.20042	2.07099e-06	7.69224e-06	0.188395	0.00446808	0.639973	0.890371
cg25353450	0.0036229	chr5	140792511	N_Shore	Body;Body;Body;Body;Body;TSS1500;Body;Body;TSS1500;Body;Body;Body;Body;Body;Body;Body;Body	PCDHGA4;PCDHGA6;PCDHGA9;PCDHGA1;PCDHGA8;PCDHGA10;PCDHGA5;PCDHGB1;PCDHGA10;PCDHGB4;PCDHGA3;PCDHGA2;PCDHGB6;PCDHGA7;PCDHGB2;PCDHGB5;PCDHGB3		PCDHGA6|56109	0.0791128	0.0632502	0.0992374	0.188395	0.00446808	0.639973	0.890371
cg06806679	0.00360906	chrX	40943654	N_Shore	TSS1500;TSS1500	USP9X;USP9X		USP9X|8239	-0.0621602	0.144694	0.198002	-0.231827	-0.00652166	0.418017	0.755096
cg15389490	0.00327097	chr6	33172333	Island	TSS200	HSD17B8		HSD17B8|7923	-0.237597	1.5976e-08	7.85845e-08	0.294591	0.00525861	0.132448	0.384913
cg08172044	0.00282864	chr6	126070462	Island	TSS1500	HEY2		HEY2|23493	-0.124428	0.00340975	0.00697275	0.233845	0.00420243	0.27771	0.614495
cg05462761	0.0028204	chr1	6545157	Island	5'UTR;5'UTR;Body;5'UTR;Body	PLEKHG5;PLEKHG5;PLEKHG5;PLEKHG5;PLEKHG5		PLEKHG5|57449	-0.285991	7.51093e-12	5.17413e-11	0.842608	0.0226126	0.0697238	0.242399
cg23186643	0.00259125	chr17	79860360	Island	1stExon	NPB	TRUE	NPB|256933	-0.073249	0.0855469	0.128674	-0.677898	-0.0993806	0.00463023	0.0295942
cg08480458	0.00258986	chr3	53529655	Island	Body;Body;Body	CACNA1D;CACNA1D;CACNA1D	TRUE	CACNA1D|776	-0.411235	6.13057e-24	7.43842e-23	0.204472	0.00312723	0.493114	0.809685
cg24408776	0.00244185	chr1	203098067	S_Shore	Body;Body	ADORA1;ADORA1		ADORA1|134	-0.346263	5.40862e-17	4.4744e-16	-0.257276	-0.00349321	0.281595	0.619178
cg17510278	0.00218556	chr20	21696115	S_Shore	3'UTR	PAX1	TRUE	PAX1|5075	0.391418	1.18376e-21	1.26731e-20	-0.159442	-0.0316395	0.52902	0.832241
cg12014008	0.0021814	chr10	48439443	S_Shore	TSS1500	GDF10	TRUE	GDF10|2662	-0.178178	2.54816e-05	7.60272e-05	0.302143	0.0519202	0.0425772	0.167285
cg14913111	0.00213099	chr1	45792733	Island	1stExon;5'UTR	HPDL;HPDL		HPDL|84842	-0.387653	3.09286e-21	2.96264e-20	0.106577	0.00691213	0.836051	0.960387
cg14743462	0.00212857	chr1	228646946	S_Shore	TSS1500	HIST3H2A		HIST3H2A|92815	-0.681521	1.29561e-76	2.35801e-74	0.126707	0.00152636	0.47625	0.79846
cg12698626	0.00200778	chr17	32581466	OpenSea	TSS1500	CCL2	TRUE	CCL2|6347	-0.0161496	0.704989	0.750999	-2.87393	-0.215647	6.32465e-06	0.000168629
cg21777188	0.00195985	chr5	140536238	N_Shore	Body	PCDHB17		PCDHB17|54661	0.186176	1.06873e-05	3.47339e-05	0.786842	0.0295805	0.120164	0.359652
cg05260062	0.00182501	chr19	1752206	N_Shore	TSS1500	ONECUT3		ONECUT3|390874	-0.0330343	0.438586	0.528627	-0.0842479	-0.00190889	0.788741	0.945864
cg08988364	0.00170944	chr3	143566850	OpenSea	Body	SLC9A9	TRUE	SLC9A9|285195	-0.0251867	0.554852	0.619703	-0.0419816	-0.00078872	0.915182	0.981007
cg08278357	0.00157244	chr19	59050122	Island								-1.38911	-0.157832	0.00543601	0.033577
cg08344341	0.00156324	chr5	36151993	Island	1stExon;TSS200;TSS200;5'UTR	LMBRD2;SKP2;SKP2;LMBRD2		LMBRD2|92255	0.0486893	0.253444	0.324837	0.484374	0.00864428	0.18225	0.475928
cg08344341	0.00156324	chr5	36151993	Island	1stExon;TSS200;TSS200;5'UTR	LMBRD2;SKP2;SKP2;LMBRD2		SKP2|6502	0.0661435	0.120615	0.168861	0.484374	0.00864428	0.18225	0.475928
cg03024587	0.0013789	chr8	67940929	Island	TSS200	LRRC67	TRUE					0.276152	0.00682661	0.314478	0.657336
cg06479032	0.00130656	chr20	1246769	Island	TSS200	SNPH		SNPH|9751	-0.419756	5.71087e-25	8.66148e-24	-0.378209	-0.0307121	0.399344	0.73968
cg09581551	0.00114865	chr6	107810162	Island	TSS1500	SOBP		SOBP|55084	-0.065314	0.125352	0.174154	-1.39678	-0.233738	0.000104713	0.00148552
cg00922376	0.00106973	chr1	14026584	Island	TSS200	PRDM2		PRDM2|7799	-0.27772	3.11067e-11	2.02193e-10	0.117862	0.00248251	0.402771	0.74251
cg08247376	0.00105348	chr17	43339358	Island	Body;Body;TSS200	C17orf46;LOC100133991;LOC100133991	TRUE
cg17485021	0.00102648	chr4	13530094	N_Shore			TRUE					0.64538	0.140387	0.239761	0.564463
cg07257042	0.000984562	chr17	40428882	Island	TSS1500	STAT5B		STAT5B|6777	-0.285867	7.67591e-12	5.17413e-11	-0.496212	-0.0245193	0.119252	0.357776
cg05647859	0.000798449	chr12	81331718	S_Shore	TSS200	LIN7A		LIN7A|8825	-0.322033	8.73122e-15	6.90905e-14	1.30146	0.106814	0.000228326	0.00274556
cg08133931	0.000797331	chr17	48636626	Island			TRUE					0.0928533	0.00763121	0.673307	0.904655
cg10911889	0.000724148	chr6	126070802	Island	5'UTR;1stExon	HEY2;HEY2		HEY2|23493	-0.147336	0.000515164	0.001172	0.0736962	0.00144838	0.763521	0.937618
cg21770330	0.000715437	chr11	124616459	Island	3'UTR;3'UTR	NRGN;NRGN		NRGN|4900	-0.0257421	0.546155	0.619703	0.293337	0.048407	0.209514	0.519642
cg14251870	0.000661041	chr6	137809529	Island
cg05472468	0.000643899	chr8	72917350	Island			TRUE					0.929731	0.0151853	0.00878612	0.0490233
cg15802898	0.000571406	chr9	100615201	N_Shore	TSS1500	FOXE1		FOXE1|2304	0.00346003	0.935356	0.943664	2.26533	0.314404	0.000328603	0.00365908
cg11901544	0.000526184	chr6	33396247	Island	Body	SYNGAP1	TRUE	SYNGAP1|8831	-0.227026	6.9527e-08	3.08632e-07	-0.518536	-0.010082	0.0455798	0.176287
cg02772928	0.000487726	chr3	18277949	OpenSea			TRUE					-0.205655	-0.0116648	0.234943	0.557623
cg06023901	0.000370336	chr6	57037482	Island	5'UTR;1stExon	BAG2;BAG2		BAG2|9532	-0.115231	0.0067239	0.0130186	0.0908448	0.00104711	0.742956	0.930871
cg02921779	0.000196878	chr4	52904682	Island	TSS200	SGCB		SGCB|6443	-0.215299	3.27436e-07	1.3243e-06	-0.0646918	0.00571009	0.796395	0.948226
cg16273041	0.000142051	chr11	47600972	S_Shore	TSS1500;TSS1500;Body;TSS1500	KBTBD4;KBTBD4;NDUFS3;KBTBD4		NDUFS3|4722	-0.0276947	0.516127	0.591706	0.601534	0.0097882	0.0821419	0.27353
cg16273041	0.000142051	chr11	47600972	S_Shore	TSS1500;TSS1500;Body;TSS1500	KBTBD4;KBTBD4;NDUFS3;KBTBD4		KBTBD4|55709	-0.092115	0.0304714	0.0504163	0.601534	0.0097882	0.0821419	0.27353
cg21249376	1.53734e-05	chr9	27528432	Island	5'UTR	MOBKL2B						-5.68139	-0.451812	2.32809e-06	7.86835e-05
cg13891539	2.16051e-06	chr12	30322730	N_Shore								-0.708376	-0.0377256	0.0871688	0.285546
cg06573088	-4.8228e-05	chr6	17492721	OpenSea	Body	CAP2	TRUE	CAP2|10486	-0.0591339	0.165321	0.222877	-1.00893	-0.159183	0.00449386	0.028913
cg26309951	-6.16161e-05	chrX	102941669	N_Shore	5'UTR;5'UTR;5'UTR;5'UTR;1stExon;1stExon;5'UTR;5'UTR;1stExon;5'UTR;1stExon;5'UTR;1stExon;5'UTR;5'UTR;5'UTR;1stExon;5'UTR;5'UTR;5'UTR;1stExon;1stExon;5'UTR;5'UTR	MORF4L2;MORF4L2;MORF4L2;MORF4L2;MORF4L2;MORF4L2;MORF4L2;MORF4L2;MORF4L2;MORF4L2;MORF4L2;MORF4L2;MORF4L2;MORF4L2;MORF4L2;MORF4L2;MORF4L2;MORF4L2;MORF4L2;MORF4L2;MORF4L2;MORF4L2;MORF4L2;MORF4L2		MORF4L2|9643	-0.0992518	0.0196815	0.0337928	0.14439	0.00304815	0.470782	0.794793
cg08193132	-7.42096e-05	chr16	88817001	S_Shore	Body	FAM38A						-0.655039	-0.105596	0.00204648	0.0155355
cg13071729	-9.09775e-05	chr1	201617443	Island	TSS200	NAV1		NAV1|89796	-0.187563	9.15702e-06	3.03014e-05	0.0547238	0.000546031	0.827088	0.957775
cg00448868	-0.000150103	chr16	66775493	OpenSea	Body	DYNC1LI2	TRUE	DYNC1LI2|1783	-0.231706	3.65748e-08	1.75174e-07	-2.2002	-0.317959	3.46271e-06	0.000106052
cg02636348	-0.000233907	chr10	78923827	OpenSea	Body;Body;Body;Body	KCNMA1;KCNMA1;KCNMA1;KCNMA1	TRUE	KCNMA1|3778	0.0209099	0.623985	0.680032	0.310421	0.0527092	0.265034	0.598417
cg16704703	-0.000262086	chr10	3509710	OpenSea								0.186274	0.00437078	0.481967	0.802263
cg24397737	-0.000333568	chr19	24184393	OpenSea								-1.21195	-0.179071	0.00247118	0.0180397
cg14013597	-0.000349827	chr2	131046122	Island								-0.17701	-0.00278095	0.479441	0.800638
cg01196858	-0.000441837	chr7	30027454	N_Shore	5'UTR;Body;5'UTR;5'UTR	SCRN1;SCRN1;SCRN1;SCRN1		SCRN1|9805	-0.57918	9.17264e-51	4.17355e-49	-0.0842177	-0.0016165	0.795323	0.947889
cg04893786	-0.000536707	chr6	37391769	OpenSea								-0.171436	-0.00489412	0.53608	0.836531
cg11931626	-0.000665276	chr4	184679532	Island								1.85939	0.146985	2.91431e-05	0.000548965
cg18558767	-0.000693359	chr3	71592056	OpenSea	5'UTR;TSS1500;5'UTR	FOXP1;MIR1284;FOXP1	TRUE	FOXP1|27086	-0.101872	0.0166546	0.0291455	-0.0519824	-0.00274136	0.796943	0.948411
cg01520309	-0.000735588	chr1	228079125	S_Shelf								0.0912883	0.00569733	0.81449	0.954002
cg03281139	-0.000836694	chr19	3451135	N_Shore	Body;Body	NFIC;NFIC	TRUE	NFIC|4782	0.0502534	0.238495	0.307844	0.532059	0.0241488	0.0606949	0.218597
cg12417362	-0.000928428	chr1	201617355	Island	TSS200	NAV1		NAV1|89796	-0.229684	4.83562e-08	2.25662e-07	0.750399	0.016941	0.262561	0.595172
cg04670848	-0.000992731	chr6	35289475	OpenSea	3'UTR	DEF6		DEF6|50619	0.10019	0.0185468	0.0321478
cg16538390	-0.00108726	chr10	135344917	S_Shelf	Body	CYP 20.00		CYP2E1|1571	0.389893	1.74916e-21	1.7686e-20	-0.514366	-0.0540932	0.206021	0.514325
cg00372774	-0.00115742	chr22	22902198	S_Shore	TSS1500;TSS1500;Body;TSS1500;TSS1500;TSS1500	PRAME;PRAME;LOC648691;PRAME;PRAME;PRAME		PRAME|23532	-0.221462	1.46585e-07	6.20431e-07	-0.137156	-0.00282672	0.676197	0.905814
cg16499474	-0.00116844	chr12	57930163	OpenSea	Body	DCTN2	TRUE	DCTN2|10540	-0.1819	1.70857e-05	5.27049e-05	0.571978	0.0382306	0.0343098	0.141767
cg26828131	-0.00132856	chr1	249106207	Island	Body	SH3BP5L		SH3BP5L|80851	-0.0216579	0.611627	0.674643	-0.0760449	-0.00116023	0.718523	0.922062
cg11164713	-0.00136842	chr13	45873076	OpenSea			TRUE					-1.70665	-0.158334	4.39925e-09	7.8371e-07
cg23954731	-0.0017108	chr19	55998081	Island	Body	NAT14		NAT14|57106	-0.110022	0.00968384	0.0179843	-0.447573	-0.0652679	0.325851	0.669699
cg00760067	-0.00173314	chr1	3532130	S_Shelf								-0.418707	-0.0229005	0.181859	0.47524
cg10990040	-0.00181068	chr14	75423113	S_Shore	TSS1500	PGF		PGF|5228	0.0514421	0.227557	0.297952	0.0167095	0.000102979	0.940728	0.987284
cg18272456	-0.00190216	chr7	131037705	OpenSea	Body;Body	MKLN1;MKLN1	TRUE	MKLN1|4289	-0.00329254	0.938479	0.943664	0.116047	0.0121863	0.673074	0.904605
cg26840755	-0.00198319	chr11	65197776	OpenSea								-0.571477	-0.0467454	0.126479	0.372873
cg22143547	-0.00225603	chr6	38671296	S_Shore	TSS1500	GLO1		GLO1|2739	0.104827	0.0137363	0.0244303	-0.888089	-0.0670062	0.000133315	0.00179485
cg03901886	-0.00236205	chr1	9600115	Island	Body	SLC25A33		SLC25A33|84275	-0.174456	3.77008e-05	0.000103963	0.809236	0.0120957	0.137455	0.394806
cg10892950	-0.00291442	chr12	45626938	OpenSea	Body;Body;Body	ANO6;ANO6;ANO6	TRUE	ANO6|196527	-0.147455	0.000509767	0.001172	0.282104	0.0457691	0.371259	0.715047
cg02051688	-0.00305915	chr11	111568985	OpenSea	Body	SIK2	TRUE	SIK2|23235	0.162091	0.000130793	0.000321679	-0.65204	-0.100974	0.15874	0.43491
cg22843803	-0.0034682	chr11	65196125	OpenSea			TRUE					-0.660197	-0.0169652	0.0583871	0.21234
cg16568056	-0.003567	chr17	72832223	Island	Body	TMEM104		TMEM104|54868	-0.123809	0.00357432	0.00722806	-0.0644693	-0.0108274	0.762025	0.937163
cg01243513	-0.00363368	chr12	58003151	N_Shore	3'UTR;TSS1500	DTX3;GEFT		DTX3|196403	0.0819414	0.0543472	0.0867648	0.233422	0.0402995	0.11595	0.350699
cg05731218	-0.00364522	chr2	216769199	OpenSea			TRUE					0.415724	0.027434	0.373976	0.717578
cg08451870	-0.00366846	chr12	57398787	N_Shore	5'UTR	ZBTB39		ZBTB39|9880	-0.144176	0.00068017	0.00149146	0.111151	0.0185642	0.546547	0.842508
cg13388277	-0.00384081	chr7	63504673	N_Shore	TSS1500	ZNF727		ZNF727|442319	0.583043	1.41211e-51	8.56683e-50	0.662705	0.112892	0.00253631	0.0184137
cg08247887	-0.00385067	chr10	44394566	OpenSea			TRUE
cg14047271	-0.00386478	chr3	184097168	N_Shore	TSS1500;TSS1500	CHRD;THPO		CHRD|8646	-0.529887	2.76957e-41	8.40102e-40	-0.0959035	-0.0164838	0.533663	0.83503
cg14047271	-0.00386478	chr3	184097168	N_Shore	TSS1500;TSS1500	CHRD;THPO		THPO|7066	-0.578568	1.23084e-50	4.48026e-49	-0.0959035	-0.0164838	0.533663	0.83503
cg23320011	-0.00411613	chr8	9485228	OpenSea	Body	TNKS	TRUE	TNKS|8658	0.0482243	0.258012	0.327904	0.431045	0.050346	0.239451	0.564031
cg15068180	-0.00413549	chr3	194017703	S_Shelf			TRUE					-0.277506	-0.0195876	0.274428	0.610311
cg26031954	-0.00463968	chr1	2139327	S_Shore	TSS200	C1orf86		C1orf86|199990	0.081318	0.0562139	0.0889647	-0.0822324	-0.00209577	0.594384	0.868278
cg22829164	-0.00467353	chr10	101156363	OpenSea			TRUE					-0.450733	-0.0533903	0.18483	0.4802
cg09499965	-0.00478798	chr7	151220664	S_Shelf								0.496936	0.0579526	0.0128013	0.0659138
cg00622105	-0.00488372	chr2	65594478	OpenSea	TSS1500;Body	SPRED2;SPRED2	TRUE	SPRED2|200734	-0.107932	0.0111647	0.0203198	-1.48619	-0.251625	9.13964e-07	3.85999e-05
cg05881745	-0.00497579	chr4	1409557	S_Shore								0.122925	-0.016395	0.755608	0.935208
cg20379593	-0.00499726	chr11	65198023	OpenSea								-2.34079	-0.201398	4.17584e-08	3.93515e-06
cg05915866	-0.00515915	chr16	73090838	N_Shore	5'UTR	ZFHX3		ZFHX3|463	-0.412561	4.25644e-24	5.53338e-23	0.35711	0.0190044	0.387124	0.72925
cg24167606	-0.00572817	chr3	183103843	OpenSea	Body	MCF2L2	TRUE	MCF2L2|23101	0.474745	2.24589e-32	5.10941e-31	0.273202	0.00476926	0.397665	0.738301
cg15348839	-0.00602534	chr2	232224846	OpenSea			TRUE					0.15747	0.011814	0.526053	0.830456
cg09774854	-0.00602641	chr17	30539553	OpenSea	Body;Body;Body	RHOT1;RHOT1;RHOT1	TRUE	RHOT1|55288	0.160927	0.000146383	0.000350548	-0.265687	-0.0190651	0.17292	0.460049
cg26484017	-0.00612271	chr7	139378403	OpenSea	Body;Body	HIPK2;HIPK2	TRUE	HIPK2|28996	0.276752	3.66207e-11	2.29826e-10	-0.435577	-0.0309274	0.0898372	0.291847
cg14233872	-0.00632727	chrX	110925365	S_Shore	Body;Body;Body;Body;Body;Body;Body;Body;Body;Body;Body;Body	ALG13;ALG13;ALG13;ALG13;ALG13;ALG13;ALG13;ALG13;ALG13;ALG13;ALG13;ALG13		ALG13|79868	-0.170399	5.72512e-05	0.000152115	-0.288201	-0.0136975	0.343656	0.688001
cg19619432	-0.00645421	chr5	159797813	S_Shore	TSS200	C1QTNF2	TRUE	C1QTNF2|114898	-0.215959	3.00778e-07	1.24413e-06	-0.190356	-0.0328167	0.191033	0.490469
cg06745797	-0.00647084	chr17	80917862	N_Shore	Body	B3GNTL1		B3GNTL1|146712	-0.0214155	0.615621	0.674957	-0.703197	-0.118144	0.000791593	0.00732163
cg16168406	-0.00655854	chr11	72414453	OpenSea	Body;Body;Body	ARAP1;ARAP1;ARAP1	TRUE	ARAP1|116985	-0.13756	0.00119523	0.00258966	-0.0558655	0.00265974	0.813548	0.953722
cg21864248	-0.0066083	chrX	7895900	S_Shore	TSS200;TSS1500	PNPLA4;PNPLA4		PNPLA4|8228	-0.223709	1.08718e-07	4.71113e-07	-0.0693082	-0.00201654	0.759826	0.936467
cg14301932	-0.00671375	chr2	237086782	Island								-1.77428	-0.0873313	3.77416e-06	0.000113157
cg00465198	-0.00687353	chr10	97807225	S_Shelf	Body;Body;Body	CCNJ;CCNJ;CCNJ		CCNJ|54619	0.245172	5.33111e-09	2.77218e-08	0.0122519	0.000466883	0.959748	0.99159
cg14094027	-0.00749658	chr12	120669080	OpenSea	5'UTR;Body;Body	PXN;PXN;PXN		PXN|5829	-0.192247	5.38876e-06	1.81621e-05	-1.0004	-0.0449181	0.00205573	0.0155916
cg03178454	-0.00796606	chr7	150672768	N_Shore	Body;Body	KCNH2;KCNH2		KCNH2|3757	-0.421459	3.5239e-25	5.83046e-24	1.48515	0.149263	0.000435703	0.00456879
cg05899064	-0.00832233	chr11	67225897	OpenSea	Body	CABP4		CABP4|57010	0.185297	1.17799e-05	3.76129e-05	-0.0996601	-0.00188235	0.803454	0.950455
cg01487683	-0.0089955	chr6	5031084	OpenSea								-0.30433	-0.0137287	0.286652	0.625418
cg03328201	-0.0090222	chr22	22007633	S_Shore	Body	MIR130B						-0.855072	-0.110335	0.0541774	0.200763
cg08116711	-0.009054	chr7	101596218	OpenSea	Body;Body;Body	CUX1;CUX1;CUX1	TRUE	CUX1|1523	-0.0350176	0.411581	0.499385	-1.03647	-0.0803818	2.80988e-05	0.00053383
cg04077141	-0.00909326	chr22	36782143	N_Shore	5'UTR	MYH9		MYH9|4627	0.0597898	0.160672	0.218227	0.0696776	0.0054098	0.846321	0.963294
cg20950843	-0.00914664	chr22	43044387	N_Shore	TSS1500;Body;TSS1500	CYB5R3;CYB5R3;CYB5R3		CYB5R3|1727	-0.04808	0.25944	0.327904	-0.072641	-0.0118728	0.790014	0.946232
cg05149537	-0.00931595	chr22	45709699	S_Shelf	5'UTR;5'UTR	FAM118A;FAM118A		FAM118A|55007	0.00924701	0.828389	0.86161	-1.02514	-0.155231	0.000294261	0.00335467
cg16209444	-0.00973596	chr3	58522771	OpenSea	5'UTR	ACOX2	TRUE	ACOX2|8309	-0.269887	1.14436e-10	6.94245e-10	-0.176551	-0.0237371	0.303654	0.645186
cg22057899	-0.0101847	chr11	64956117	OpenSea	Body	CAPN1		CAPN1|823	0.255836	1.0677e-09	5.71532e-09	-0.0127402	-0.000226555	0.977148	0.995208
cg18726664	-0.0102238	chr6	5771802	OpenSea	3'UTR	FARS2		FARS2|10667	0.0282479	0.507777	0.588633	0.151294	0.00723583	0.509888	0.820248
cg03467567	-0.0103946	chr6	158732600	OpenSea	TSS1500;TSS1500	TULP4;TULP4		TULP4|56995	-0.0966515	0.0231489	0.0393747	0.200202	0.0128752	0.342765	0.687134
cg02345399	-0.0105139	chr11	65195039	S_Shelf								-1.39319	-0.0767977	0.000623665	0.00606134
cg26272125	-0.010739	chr1	27662075	OpenSea	3'UTR	TMEM222		TMEM222|84065	-0.0782536	0.0661813	0.102949	-0.0577025	-0.00242874	0.789039	0.945971
cg27587095	-0.010846	chr2	240062186	S_Shore	Body	HDAC4		HDAC4|9759	-0.0509414	0.23212	0.301757	1.53016	0.22215	9.7345e-06	0.000234618
cg09884146	-0.0109906	chr2	65593908	OpenSea	5'UTR;1stExon;Body	SPRED2;SPRED2;SPRED2	TRUE	SPRED2|200734	-0.167788	7.45411e-05	0.000191077	-0.126256	-0.00590487	0.770789	0.940019
cg18643383	-0.0110396	chr2	69864882	OpenSea	Body	AAK1	TRUE	AAK1|22848	0.0312246	0.464091	0.549308	-0.228851	-0.0159261	0.26086	0.592888
cg14711869	-0.0111023	chr4	2716524	OpenSea	Body	FAM193A	TRUE	FAM193A|8603	-0.110434	0.00941312	0.0178457	-0.747822	-0.113299	0.00894965	0.0497543
cg08252585	-0.0112753	chr2	24931616	OpenSea	Body;Body;Body	NCOA1;NCOA1;NCOA1	TRUE	NCOA1|8648	0.174094	3.91468e-05	0.000106339	0.228285	0.0214914	0.518224	0.82555
cg13990980	-0.0116569	chr14	69891511	OpenSea	Body	SLC39A9	TRUE	SLC39A9|55334	0.0404057	0.343356	0.425108	-0.628842	-0.0552091	0.0331084	0.137972
cg05972185	-0.012747	chr16	72972644	OpenSea	Body;Body	ZFHX3;ZFHX3	TRUE	ZFHX3|463	-0.0692179	0.104266	0.153036	-0.947467	-0.0694188	0.00723698	0.0420667
cg12460175	-0.0128852	chr22	18268062	Island								0.153812	0.00314727	0.400612	0.740742
cg18425731	-0.0132282	chr2	158184641	OpenSea	TSS1500	ERMN		ERMN|57471	-0.0763015	0.0732567	0.112989	-1.38153	-0.132126	2.57792e-05	0.000499309
cg09472928	-0.0134874	chr5	175393743	N_Shore	Body	THOC3		THOC3|84321	-0.193384	4.72917e-06	1.65521e-05	0.233031	0.0125607	0.403245	0.742909
cg06437173	-0.0139984	chr10	50666820	OpenSea	3'UTR	ERCC6		ERCC6|2074	0.00728798	0.864347	0.893814	-0.74377	-0.0579094	0.00798649	0.0454574
cg22384801	-0.0140989	chr15	60767308	N_Shelf	5'UTR;Body	NARG2;NARG2		NARG2|79664	0.146768	0.000541803	0.00121738	-0.274449	-0.0210253	0.30482	0.646482
cg02481642	-0.0142148	chr20	43343760	OpenSea	TSS200	WISP2	TRUE	WISP2|8839	0.0297992	0.484746	0.569185	0.258392	0.00893438	0.41771	0.754859
cg23016243	-0.0143678	chr17	42983768	OpenSea	3'UTR	GFAP	TRUE	GFAP|2670	0.211781	5.12658e-07	2.02834e-06	-0.0374716	-0.00600786	0.905238	0.978651
cg27333283	-0.014726	chr16	19514279	OpenSea	3'UTR	GDE1		GDE1|51573	-0.176071	3.18398e-05	9.19817e-05	-0.428463	-0.0631655	0.115529	0.349786
cg00731886	-0.0150078	chr4	1363008	N_Shore	Body	KIAA1530						-0.159801	-0.0123352	0.405493	0.744886
cg03753454	-0.0150234	chr16	70787597	OpenSea	Body	VAC14		VAC14|55697	-0.0918728	0.0309127	0.0506857	-0.751765	-0.0560824	0.00585492	0.0355797
cg03376089	-0.0164841	chr17	17839409	OpenSea	Body;Body	TOM1L2;TOM1L2	TRUE	TOM1L2|146691	0.169651	6.17754e-05	0.000160616	-0.244428	-0.0201737	0.373937	0.717548
cg01581050	-0.0166106	chr7	139256124	OpenSea	3'UTR;3'UTR	HIPK2;HIPK2		HIPK2|28996	0.207686	8.55634e-07	3.31331e-06	0.0430439	0.000554418	0.823476	0.956639
cg13361307	-0.0167197	chr2	100365075	OpenSea	Body;Body	AFF3;AFF3	TRUE	AFF3|3899	-0.0668903	0.116471	0.165607
cg18542050	-0.0169494	chr12	89986573	OpenSea	Body;Body	ATP2B1;ATP2B1	TRUE	ATP2B1|490	0.0704006	0.0984651	0.145696	-0.451669	-0.0332409	0.0724787	0.249439
cg14815778	-0.0175858	chrX	152865295	S_Shore	TSS1500;TSS1500	FAM58A;FAM58A		FAM58A|92002	-0.0738692	0.0829239	0.126825	-0.136033	-0.00471861	0.63012	0.885775
cg07402188	-0.0184321	chr19	40720005	Island	Body	MAP3K10		MAP3K10|4294	-0.0254852	0.550169	0.619703	-0.723908	-0.0896487	0.00836865	0.0471672
cg13447284	-0.0184502	chr17	63116336	N_Shelf								0.166276	0.00813172	0.571968	0.856803
cg14076360	-0.0187314	chr5	61917363	OpenSea	Body;Body	IPO11;IPO11	TRUE	IPO11|51194	-0.0316701	0.457738	0.548081	0.0793038	0.00425593	0.761161	0.936876
cg26621897	-0.0188603	chrX	101772051	S_Shore	TSS1500	TMSB15A		TMSB15A|11013	-0.166492	8.48529e-05	0.000214489	-0.108537	-0.00464107	0.628694	0.885027
cg05317956	-0.0199848	chr10	99409824	OpenSea	Body	PI4K2A	TRUE	PI4K2A|55361	-0.146461	0.000556703	0.00123561	-0.526422	-0.0418179	0.0616871	0.221295
cg27138059	-0.0203993	chr19	6272597	S_Shore	Body	MLLT1	TRUE	MLLT1|4298	-0.126936	0.00281123	0.00588096	0.768199	0.100017	0.00631244	0.0377693
cg05320944	-0.0210971	chr14	76018865	OpenSea			TRUE					-1.48961	-0.19607	1.13115e-05	0.00026393
cg27458152	-0.0213799	chr8	22249664	OpenSea	5'UTR;5'UTR;5'UTR;5'UTR	SLC39A14;SLC39A14;SLC39A14;SLC39A14	TRUE	SLC39A14|23516	-0.297703	9.25714e-13	6.7392e-12	-0.0603799	-0.00325047	0.783797	0.944236
cg03644238	-0.0229954	chr7	148400542	S_Shelf	5'UTR	CUL1		CUL1|8454	0.25674	9.28519e-10	5.12092e-09	0.0808151	0.00585569	0.742941	0.93087
cg17620425	-0.0234134	chr13	37403552	OpenSea	3'UTR	RFXAP		RFXAP|5994	0.0276417	0.51693	0.591706	0.216177	0.0153264	0.659738	0.898929
cg15228441	-0.0238506	chr17	78829930	N_Shore	Body;Body	RPTOR;RPTOR	TRUE	RPTOR|57521	0.170328	5.76699e-05	0.000152115	0.780125	0.0904111	0.036328	0.148115
cg17684572	-0.0259868	chr3	47950807	OpenSea	Body;1stExon;1stExon;Body	MAP4;MAP4;MAP4;MAP4	TRUE	MAP4|4134	0.0187197	0.660767	0.71583	0.141884	0.00688393	0.377784	0.720999
cg16288421	-0.0289342	chr4	54213525	OpenSea	Body	SCFD2	TRUE	SCFD2|152579	-0.0670022	0.115859	0.165607	-1.37905	-0.223425	0.000284666	0.00326705
cg09407859	-0.0307803	chr16	66995461	OpenSea	Body	CES3		CES3|23491	-0.476106	1.414e-32	3.67639e-31	2.72282	0.275967	2.22307e-08	2.50103e-06
cg20762313	-0.0308595	chr15	79605100	S_Shore	Body	TMED3		TMED3|23423	-0.181666	1.75259e-05	5.31618e-05
cg20417424	-0.0308823	chr1	77331940	N_Shore	TSS1500	ST6GALNAC5		ST6GALNAC5|81849	-0.195624	3.64735e-06	1.3016e-05	1.03107	0.0705479	0.0179573	0.0858603
cg27243507	-0.0311314	chr3	101808873	OpenSea			TRUE					-0.660462	-0.105541	0.00182028	0.0141619
cg05767546	-0.0481098	chr1	70816768	N_Shelf	Body	ANKRD13C		ANKRD13C|81573	0.00448171	0.91633	0.931687
cg19297537	-0.0492609	chr10	71142369	OpenSea	Body;Body;Body;Body;Body	HK1;HK1;HK1;HK1;HK1		HK1|3098	0.104728	0.0138259	0.0244303	0.0213408	0.000671172	0.917664	0.981537
cg08878651	-0.0641318	chr17	30066757	OpenSea			TRUE					-0.171639	-0.00689634	0.440407	0.772503

## Sheet: TAM
Additional file 7 – Results of multi-locus survival analysis, TAM cohort
Annotation based on IlluminaHumanMethylation450kanno.ilmn12.hg19 R package
pos			Position on the chromosome (indicated in column 'chr')
Gene			Gene symbol | Entrez Gene ID
Correlation coefficient			Pearson correlation between gene expression and methylation profiles
P-value (corr.)			Pearson correlation test P-value
Adj. P-value (corr.)			Benjamini-Hochberg adjusted P-value for correlation test
log2FC (M7 vs. WT)			Log2 fold change of methylation at month 7 versus WT
Delta beta (M7 vs. WT)			Methylation beta value difference
P-Value (M7 vs. WT)			P-value of differential methylation test
Adj. P-value (M7 vs. WT)			Benjamini-Hochberg adjusted P-value of differential methylation test
CpG ID	Coefficient	chr	pos	Relation_to_Island	UCSC_RefGene_Group	UCSC_RefGene_Name	Enhancer	Gene	Correlation coefficient	P-value (corr.)	Adj. P-value (corr.)	log2FC (M7 vs. WT)	Delta beta (M7 vs. WT)	P-Value (M7 vs. WT)	Adj. P-value (M7 vs. WT)
cg03176411	0.0348618	chr6	26026751	N_Shore								-0.0745619	-0.000911955	0.762212	0.958043
cg00467529	0.0136107	chr11	117857293	Island	Body;Body	IL10RA;IL10RA	TRUE	IL10RA|3587	-0.191011	0.0120738	0.0295644	-2.9481	-0.191747	3.36652e-07	9.41372e-06
cg16290123	0.0126966	chr1	6663532	Island	TSS1500	KLHL21		KLHL21|9903	-0.491172	7.86342e-12	1.29746e-10
cg13001868	0.0105949	chr17	43339223	Island	Body;Body;TSS1500	C17orf46;LOC100133991;LOC100133991
cg08795948	0.00364139	chr3	128337044	Island								-2.60383	-0.419913	6.41077e-13	3.20486e-10
cg02050613	-0.00127319	chr12	6618003	OpenSea	TSS1500;Body	SCARNA10;NCAPD2		NCAPD2|9918	0.305891	4.48969e-05	0.000370399	0.020431	0.000986687	0.926173	0.989577
cg02050613	-0.00127319	chr12	6618003	OpenSea	TSS1500;Body	SCARNA10;NCAPD2		SCARNA10|692148	0.0718946	0.348642	0.426118	0.020431	0.000986687	0.926173	0.989577
cg27006169	-0.00214568	chr4	85612912	OpenSea	Body	WDFY3	TRUE	WDFY3|23001	0.13231	0.0835954	0.132533	0.203672	0.0140225	0.474407	0.826343
cg16499474	-0.0032348	chr12	57930163	OpenSea	Body	DCTN2	TRUE	DCTN2|10540	-0.174378	0.0221478	0.0429928	0.792114	0.0509315	0.016635	0.0710921
cg06923988	-0.00361502	chr12	112035285	N_Shore	Body	ATXN2		ATXN2|6311	-0.180325	0.0179267	0.0394388	-0.14792	-0.00193091	0.560446	0.880982
cg06300944	-0.0037316	chrX	153141270	OpenSea	1stExon;1stExon;1stExon	L1CAM;L1CAM;L1CAM		L1CAM|3897	-0.113552	0.138032	0.189794	-0.0121885	-0.000193673	0.95484	0.993692
cg00566187	-0.00418812	chr1	230250356	OpenSea	Body	GALNT2		GALNT2|2590	0.10259	0.180513	0.238278	0.327416	0.0140577	0.303139	0.655628
cg06707993	-0.00446724	chr17	78152466	N_Shelf	5'UTR	CARD14		CARD14|79092	-0.131996	0.0843392	0.132533	0.0220599	0.00207751	0.942196	0.991894
cg18558767	-0.00683317	chr3	71592056	OpenSea	5'UTR;TSS1500;5'UTR	FOXP1;MIR1284;FOXP1	TRUE	FOXP1|27086	-0.211643	0.00531862	0.0175515	-0.186167	-0.0106363	0.44861	0.806328
cg09407859	-0.00760086	chr16	66995461	OpenSea	Body	CES3		CES3|23491	-0.494929	5.1497e-12	1.29746e-10	2.46952	0.23545	4.14816e-06	7.24529e-05
cg16288421	-0.0104388	chr4	54213525	OpenSea	Body	SCFD2	TRUE	SCFD2|152579	-0.0364331	0.635152	0.676129	-1.04355	-0.175548	0.0157129	0.0678048
cg23070574	-0.0107013	chr3	14187308	OpenSea	3'UTR;Body;3'UTR	XPC;XPC;XPC		XPC|7508	-0.117809	0.123766	0.177578	-0.0168384	-0.00115015	0.949156	0.992911
cg11295183	-0.0145567	chr10	466878	S_Shore	Body	DIP2C		DIP2C|22982	-0.164512	0.0310414	0.0569092	0.166591	0.00716246	0.618628	0.909548
cg14791640	-0.0214449	chr1	85037040	N_Shelf	Body	CTBS		CTBS|1486	-0.0130446	0.865138	0.865138	-0.0783281	-0.00346228	0.767088	0.959136
cg12473916	-0.0218107	chr1	154943651	N_Shelf	5'UTR;5'UTR;TSS1500;TSS1500	SHC1;SHC1;SHC1;SHC1		SHC1|6464	-0.355359	1.72212e-06	1.89433e-05	0.686361	0.0291651	0.0689484	0.225423
cg08776331	-0.0300138	chr16	2125989	Island	Body;Body;Body	TSC2;TSC2;TSC2		TSC2|7249	-0.20768	0.00626264	0.0187879	0.1802	0.0159471	0.593588	0.898121
cg26617272	-0.0374356	chr1	43279726	N_Shelf	Body	CCDC23		CCDC23|374969	-0.0624086	0.416042	0.490336	0.0924762	0.00451994	0.6982	0.939403
cg17490981	-0.0377284	chr5	154159000	OpenSea	Body;Body	LARP1;LARP1	TRUE	LARP1|23367	-0.19718	0.00952408	0.0261912	0.846779	0.0522815	0.0159502	0.0686493
cg02506353	-0.0404341	chr5	10702346	OpenSea	Body	DAP	TRUE	DAP|1611	-0.214702	0.00467942	0.0171579	-0.00701393	0.000106764	0.982386	0.997661
cg05295417	-0.0419424	chrX	148623231	S_Shore	5'UTR	CXorf40A		CXorf40A|91966	-0.0447608	0.559863	0.627957
cg02591442	-0.042396	chr16	48180565	OpenSea	5'UTR;1stExon	ABCC12;ABCC12		ABCC12|94160	-0.218499	0.00398214	0.0164263	0.0191053	0.00112054	0.938026	0.991293
cg23217940	-0.0453548	chr15	22954817	OpenSea	Body;TSS1500	CYFIP1;CYFIP1		CYFIP1|23191	-0.178336	0.0192528	0.0397089	0.0384621	0.00383813	0.901116	0.985905
cg18272456	-0.0462294	chr7	131037705	OpenSea	Body;Body	MKLN1;MKLN1	TRUE	MKLN1|4289	-0.0435126	0.57087	0.627957	0.0499437	0.00533205	0.880659	0.982405
cg03376089	-0.0485244	chr17	17839409	OpenSea	Body;Body	TOM1L2;TOM1L2	TRUE	TOM1L2|146691	0.266032	0.000419804	0.00230892	-0.647122	-0.0481839	0.0575894	0.195491
cg07726222	-0.055129	chr16	2125875	Island	Body;Body;Body	TSC2;TSC2;TSC2		TSC2|7249	-0.190005	0.0125425	0.0295644	0.188034	0.011519	0.64451	0.920352
cg13370010	-0.0565387	chr13	33743647	OpenSea	5'UTR;Body;Body	STARD13;STARD13;STARD13	TRUE	STARD13|90627	0.0143822	0.851461	0.865138	-0.0490067	-0.00278145	0.85148	0.977366
cg06551697	-0.0569618	chr17	56612362	S_Shelf			TRUE
cg16667480	-0.0706861	chr3	47628331	OpenSea	3'UTR	SMARCC1		SMARCC1|6599	0.136636	0.0738907	0.128337	0.203681	0.0307455	0.761679	0.957878
cg03467567	-0.0772721	chr6	158732600	OpenSea	TSS1500;TSS1500	TULP4;TULP4		TULP4|56995	-0.227463	0.00269245	0.012693	-0.0680353	-0.00473239	0.788671	0.964564
cg07244783	-0.0872191	chr4	4432211	OpenSea	Body	STX18	TRUE	STX18|53407	0.127408	0.0958031	0.143705	-0.503228	-0.0281151	0.10679	0.316825
cg11875624	-0.0921313	chrX	138276972	Island	5'UTR;Body;Body	FGF13;FGF13;FGF13		FGF13|2258	-0.277327	0.000230416	0.00152075	0.0152775	-4.00441e-05	0.975636	0.996681
cg12218895	-0.174437	chr20	3898940	OpenSea	Body;TSS1500;Body;Body	PANK2;MIR103-2AS;PANK2;PANK2	TRUE	PANK2|80025	-0.0999582	0.192012	0.243708	-0.843917	-0.0627833	0.0247717	0.0986628

## Sheet: AI
Additional file 7 – Results of multi-locus survival analysis, AI cohort
Annotation based on IlluminaHumanMethylation450kanno.ilmn12.hg19 R package
pos			Position on the chromosome (indicated in column 'chr')
Gene			Gene symbol | Entrez Gene ID
Correlation coefficient			Pearson correlation between gene expression and methylation profiles
P-value (corr.)			Pearson correlation test P-value
Adj. P-value (corr.)			Benjamini-Hochberg adjusted P-value for correlation test
log2FC (M7 vs. WT)			Log2 fold change of methylation at month 7 versus WT
Delta beta (M7 vs. WT)			Methylation beta value difference
P-Value (M7 vs. WT)			P-value of differential methylation test
Adj. P-value (M7 vs. WT)			Benjamini-Hochberg adjusted P-value of differential methylation test
CpG ID	Coefficient	chr	pos	Relation_to_Island	UCSC_RefGene_Group	UCSC_RefGene_Name	Enhancer	Gene	Correlation coefficient	P-value (corr.)	Adj. P-value (corr.)	log2FC (M7 vs. WT)	Delta beta (M7 vs. WT)	P-Value (M7 vs. WT)	Adj. P-value (M7 vs. WT)
cg16551483	0.0415625	chr17	4981823	Island	5'UTR;1stExon	ZFP3;ZFP3	TRUE	ZFP3|124961	-0.362976	6.14853e-08	7.22981e-07	-0.073413	-0.000490063	0.951921	0.9945
cg16656286	0.03219	chr17	4981603	Island	TSS200	ZFP3	TRUE	ZFP3|124961	-0.398188	2.16108e-09	3.998e-08	0.113096	0.00194219	0.60404	0.916664
cg09551172	0.0302175	chr1	100315427	Island	TSS1500;TSS1500;TSS1500;TSS1500;TSS1500	AGL;AGL;AGL;AGL;AGL		AGL|178	-0.195467	0.00446695	0.0140661	0.0285027	0.000477589	0.908991	0.989254
cg18865127	0.0284351	chr5	133450281	Island	TSS1500;TSS1500;TSS1500;TSS1500;TSS200;TSS1500;TSS1500	TCF7;TCF7;TCF7;TCF7;TCF7;TCF7;TCF7		TCF7|6932	-0.0914517	0.186795	0.28734	0.031951	0.000474876	0.884404	0.985965
cg05142115	0.0255251	chr7	30544301	Island	1stExon	GGCT		GGCT|79017	-0.0322575	0.642084	0.730988	0.229068	0.00515111	0.547514	0.892536
cg11546106	0.0237071	chr1	32706831	Island	Body	MTMR9L
cg09483904	0.0228856	chr6	33172551	Island	Body	HSD17B8		HSD17B8|7923	-0.254538	0.00019286	0.000984249	-0.00339368	-7.06113e-05	0.991691	0.999124
cg15389490	0.0221259	chr6	33172333	Island	TSS200	HSD17B8		HSD17B8|7923	-0.295966	1.29193e-05	9.56028e-05	0.398471	0.00726896	0.0943428	0.335453
cg18288576	0.0200663	chr1	150122500	Island	Body	PLEKHO1		PLEKHO1|51177	0.0481943	0.487283	0.586324	0.0422689	0.000927403	0.86187	0.982614
cg19852344	0.0188097	chr12	133463945	Island	5'UTR;5'UTR;5'UTR;5'UTR;5'UTR	CHFR;CHFR;CHFR;CHFR;CHFR		CHFR|55743	-0.0486293	0.483357	0.586324	0.0849972	0.00120179	0.706348	0.949755
cg17070611	0.0180226	chr13	33001498	Island	Body;Body	N4BP2L1;N4BP2L1		N4BP2L1|90634	-0.248938	0.000269003	0.00123336	0.129167	0.0020174	0.527341	0.882437
cg19270251	0.017751	chr10	75531974	Island	TSS200	FUT11		FUT11|170384	-0.15701	0.022855	0.0545571	-0.113804	-0.0188636	0.575894	0.905558
cg18418538	0.0169118	chr19	48997000	Island	Body	LMTK3		LMTK3|114783	-0.159942	0.020401	0.0511754	0.174466	0.00164087	0.528209	0.882906
cg09765994	0.0164791	chr1	14026605	Island	TSS200	PRDM2		PRDM2|7799	-0.277761	4.47022e-05	0.000254459	-0.128242	-0.00271758	0.638194	0.929181
cg05873146	0.0160792	chr17	29335669	Island
cg09809567	0.0150158	chr12	104444136	OpenSea	TSS1500	GLT8D2		GLT8D2|83468	-0.0924053	0.182223	0.286904	0.24677	0.00566638	0.47464	0.853074
cg08714407	0.0147179	chr2	24307071	Island	Body;1stExon	TP53I3;TP53I3		TP53I3|9540	0.0192004	0.782083	0.834443	0.156037	0.00258577	0.495911	0.865693
cg27561954	0.0144257	chr1	10057312	Island	1stExon;5'UTR	RBP7;RBP7		RBP7|116362	-0.0579469	0.403481	0.528453	0.119789	0.00206016	0.800424	0.971843
cg05099600	0.0135757	chr10	75531982	Island	TSS200	FUT11		FUT11|170384	-0.167046	0.0153788	0.0406441	-0.0956762	-0.0147941	0.712578	0.95162
cg05375277	0.0128901	chr11	57283463	S_Shore	TSS1500	SLC43A1		SLC43A1|8501	-0.152777	0.0268464	0.0611272	1.1576	0.114109	0.0661155	0.259401
cg05780177	0.012446	chr1	197744757	Island	TSS200;TSS200	DENND1B;DENND1B	TRUE	DENND1B|163486	-0.457668	2.87355e-12	1.06321e-10	-0.233823	-0.0403	0.314979	0.716709
cg06472065	0.0110907	chr6	33394446	N_Shore	Body	SYNGAP1		SYNGAP1|8831	0.0636347	0.358839	0.48629	-0.880525	-0.0354044	0.100891	0.351739
cg07679836	0.0107823	chr6	33548423	OpenSea	TSS1500	BAK1		BAK1|578	-0.226498	0.000947234	0.00368923	0.891566	0.103135	0.0203006	0.106397
cg24505687	0.0106182	chr6	33548425	OpenSea	TSS1500	BAK1		BAK1|578	-0.196139	0.00432925	0.0139289	0.41092	0.0588788	0.0523289	0.217903
cg19442545	0.0104762	chr10	75533431	S_Shore	Body	FUT11		FUT11|170384	-0.15136	0.0283098	0.0634826	0.143948	0.0199107	0.628306	0.925803
cg10353108	0.0101808	chr11	119227105	Island	3'UTR;3'UTR	USP2;USP2	TRUE	USP2|9099	0.263957	0.000108324	0.000593775	0.498729	0.011468	0.342893	0.746396
cg26039926	0.00954461	chrX	40945750	S_Shore	5'UTR;5'UTR	USP9X;USP9X		USP9X|8239	-0.110832	0.109274	0.19253	0.141997	0.01773	0.729173	0.956012
cg22343728	0.00911177	chr22	46287028	S_Shore								-0.0370239	-0.00180684	0.911378	0.989498
cg00120948	0.00882513	chr1	8484417	S_Shore	Body;TSS1500;Body	RERE;RERE;RERE		RERE|473	-0.153332	0.0262911	0.0607982	-1.76041	-0.290505	0.0362433	0.165351
cg21789280	0.0084161	chr1	22351425	N_Shore	TSS1500;TSS1500	HSPC157;HSPC157						-0.54702	-0.0193399	0.0992339	0.347711
cg27427357	0.00826498	chr6	26027618	Island	TSS200	HIST1H4B		HIST1H4B|8366	0.0337782	0.626463	0.718733	0.143047	0.00338337	0.499492	0.867671
cg01733045	0.00770113	chr3	51705063	Island	TSS200;TSS200;TSS200	TEX264;TEX264;TEX264		TEX264|51368	0.0398692	0.565602	0.659127	0.260001	0.00439058	0.425704	0.819913
cg07361491	0.00764362	chr18	19749535	Island	5'UTR;1stExon	GATA6;GATA6		GATA6|2627	-0.0233075	0.737031	0.814034	-0.285658	-0.0125024	0.447072	0.835032
cg19392329	0.0075679	chr22	44287485	N_Shore	Body	PNPLA5	TRUE	PNPLA5|150379	-0.164972	0.0167195	0.043412	-0.600934	-0.0978152	0.00448583	0.0331484
cg07433344	0.00728817	chr6	33172450	Island	1stExon	HSD17B8		HSD17B8|7923	-0.362615	6.35051e-08	7.22981e-07	0.0841562	0.00290207	0.751626	0.961358
cg25165382	0.00728482	chr12	12877503	Island	TSS1500	APOLD1		APOLD1|81575	-0.155868	0.0238784	0.0560954	0.441672	0.00972596	0.118291	0.393215
cg05978988	0.00710439	chr12	49393244	Island	TSS200	DDN	TRUE	DDN|23109	0.13832	0.0452717	0.0917838	2.57806	0.157226	0.00116515	0.0116883
cg10904972	0.00663002	chr11	119227328	Island	3'UTR;3'UTR	USP2;USP2	TRUE	USP2|9099	0.33369	7.44594e-07	6.48235e-06	0.547559	0.0084123	0.431357	0.823929
cg12283120	0.00639672	chr6	33172398	Island	TSS200	HSD17B8		HSD17B8|7923	-0.313269	3.66244e-06	2.85285e-05	-0.0254262	-0.000883778	0.935479	0.992606
cg26802025	0.00608257	chr6	44265320	Island	5'UTR	TCTE1		TCTE1|202500	-0.0199278	0.774047	0.834443	0.0667739	0.00195926	0.866204	0.983397
cg21577233	0.00593855	chr1	201507860	Island								0.0698723	0.00562503	0.709343	0.950631
cg03905905	0.00573032	chr2	63277850	Island	TSS200	OTX1		OTX1|5013	-0.0688752	0.320554	0.456173	0.190514	0.00226926	0.448659	0.836087
cg26114324	0.00560396	chr1	44401857	Island	1stExon;Body;Body;Body;Body	ARTN;ARTN;ARTN;ARTN;ARTN		ARTN|9048	-0.150767	0.0289418	0.0635341	0.556657	0.0113677	0.396143	0.796321
cg19767477	0.00559845	chr5	127420684	S_Shore	Body	SLC12A2		SLC12A2|6558	-0.389274	5.23856e-09	8.61452e-08	1.42651	0.0396005	0.000681972	0.00773614
cg05460030	0.00554453	chr1	202927977	S_Shore	TSS1500;TSS1500	ADIPOR1;ADIPOR1		ADIPOR1|51094	-0.0502157	0.469184	0.586324
cg20383299	0.0045797	chr3	115503964	S_Shore			TRUE					0.434415	0.0120289	0.212873	0.577419
cg21308111	0.00456684	chr8	23082634	Island	1stExon;5'UTR	TNFRSF10A;TNFRSF10A		TNFRSF10A|8797	-0.158938	0.0212146	0.0523293	0.44316	0.0132979	0.248378	0.632115
cg27092752	0.00446629	chr11	119227298	Island	3'UTR;3'UTR	USP2;USP2	TRUE	USP2|9099	0.284847	2.78555e-05	0.000164904	0.464875	0.0130906	0.38343	0.785191
cg22647810	0.0044634	chr6	33172371	Island	TSS200	HSD17B8		HSD17B8|7923	-0.290233	1.92769e-05	0.000122751	0.18323	0.00355248	0.475633	0.853679
cg08343881	0.00404663	chr6	28304075	OpenSea	1stExon;TSS200;5'UTR;TSS200;5'UTR;5'UTR;Body	ZNF323;ZNF323;ZNF323;ZNF323;ZNF323;ZNF323;ZNF323						0.109981	0.00347276	0.647358	0.932234
cg06314872	0.00352536	chr16	66638702	Island	5'UTR;5'UTR;5'UTR;5'UTR;1stExon	CMTM3;CMTM3;CMTM3;CMTM3;CMTM3		CMTM3|123920	-0.0777524	0.261984	0.387737	-0.238616	-0.00344283	0.575104	0.9052
cg19011063	0.00337463	chr5	170171465	Island								-0.124964	-0.0208064	0.476856	0.854449
cg09266771	0.00292392	chr12	63207138	OpenSea	Body	PPM1H		PPM1H|57460	0.327581	1.21392e-06	9.98108e-06	-0.231208	-0.00472813	0.545622	0.891679
cg05181110	0.00271226	chrX	40944360	Island	TSS1500;TSS1500	USP9X;USP9X		USP9X|8239	-0.0129609	0.851889	0.881676	-0.123859	-0.0034128	0.818623	0.975446
cg02021606	0.00261552	chr21	44845925	OpenSea	Body	SIK1		SIK1|150094	-0.192038	0.00523321	0.0158064	0.138726	0.00346143	0.639102	0.929459
cg00922376	0.00260652	chr1	14026584	Island	TSS200	PRDM2		PRDM2|7799	-0.341902	3.79525e-07	3.73285e-06	0.15746	0.00336216	0.356614	0.760386
cg22276332	0.00255728	chr4	156588175	N_Shore	5'UTR;5'UTR;5'UTR;5'UTR;1stExon;5'UTR;5'UTR;1stExon;TSS1500	GUCY1A3;GUCY1A3;GUCY1A3;GUCY1A3;GUCY1A3;GUCY1A3;GUCY1A3;GUCY1A3;GUCY1A3		GUCY1A3|2982	-0.294488	1.43351e-05	0.000101028	0.259102	0.0186684	0.472391	0.851544
cg01720742	0.00235293	chr1	22351395	N_Shore	TSS1500;TSS1500	HSPC157;HSPC157
cg24671572	0.00206048	chr6	28109577	Island	TSS200	ZNF192						0.321496	0.0137915	0.448788	0.836169
cg21672339	0.00190048	chr12	49319475	Island	TSS200;TSS1500;TSS200	FKBP11;FKBP11;FKBP11	TRUE	FKBP11|51303	-0.229803	0.000792759	0.00325912	0.0517736	0.00236568	0.891031	0.986811
cg15507391	0.001439	chr11	66139221	Island	5'UTR;1stExon	SLC29A2;SLC29A2		SLC29A2|3177	-0.341164	4.03551e-07	3.73285e-06	0.0350604	0.00038003	0.890101	0.986685
cg11664467	0.00136073	chr6	28249704	S_Shore	5'UTR	PGBD1	TRUE	PGBD1|84547	-0.487464	6.22031e-14	3.06869e-12	-2.39897	-0.186672	3.69933e-06	0.000155905
cg22660447	0.000975408	chr16	89778660	Island	Body	C16orf7	TRUE					-0.611279	-0.0320917	0.0284705	0.137761
cg01915076	0.000746935	chr12	49393228	Island	TSS200	DDN	TRUE	DDN|23109	0.115606	0.0947414	0.173108	1.05198	0.064037	0.109351	0.372275
cg06757357	0.000706151	chr7	73497746	N_Shore	TSS1500	LIMK1		LIMK1|3984	-0.0209938	0.762311	0.829574
cg17716453	0.00059719	chr19	15619355	Island	1stExon;5'UTR	CYP4F22;CYP4F22		CYP4F22|126410	-0.097208	0.160439	0.25706	-1.17809	-0.0281381	0.00364419	0.0282199
cg24720717	0.000560923	chr1	90309410	Island	5'UTR;5'UTR	LRRC8D;LRRC8D	TRUE	LRRC8D|55144	0.0414923	0.549874	0.645884
cg03160815	0.000537797	chr17	79859830	Island	TSS1500	NPB	TRUE	NPB|256933	-0.116203	0.0930373	0.172119	-0.112762	-0.0140795	0.671184	0.9399
cg14099528	0.000455659	chrX	40944327	Island	TSS1500;TSS1500	USP9X;USP9X		USP9X|8239	-0.0886446	0.200744	0.300102	0.271487	0.0101036	0.336282	0.739683
cg14425347	0.000319545	chr6	33395005	N_Shore	Body	SYNGAP1		SYNGAP1|8831	0.136583	0.0480721	0.0961442	-0.319904	-0.0158261	0.488497	0.861396
cg05425213	0.000217796	chr11	124616208	Island	3'UTR;3'UTR	NRGN;NRGN		NRGN|4900	0.0656322	0.343921	0.480192	0.611667	0.10518	0.0104155	0.0636713
cg07420163	0.000155566	chr16	89778301	Island	Body	C16orf7	TRUE					0.0168767	0.000249268	0.953991	0.994683
cg20070026	8.9423e-05	chr14	102248073	Island	Body;Body	PPP2R5C;PPP2R5C	TRUE	PPP2R5C|5527	0.0138875	0.841436	0.87699	0.466876	0.06465	0.232687	0.608668
cg00699919	-0.000142739	chr1	168058592	OpenSea	Body	GPR161	TRUE	GPR161|23432	0.0641717	0.354789	0.486192	-0.137762	-0.0139155	0.698756	0.947727
cg24264962	-0.000252206	chr3	31958652	OpenSea	Body	OSBPL10	TRUE	OSBPL10|114884	-0.241716	0.000408634	0.00177876
cg11824191	-0.000329509	chr1	183274124	OpenSea	TSS200;Body	NMNAT2;NMNAT2		NMNAT2|23057	-0.134458	0.0516911	0.102004
cg24561419	-0.000481112	chr5	79553606	S_Shore								0.804687	0.0596462	0.0415767	0.183287
cg20893542	-0.000898039	chr3	187929286	OpenSea	TSS1500;5'UTR	LPP;LPP	TRUE	LPP|4026	0.0490739	0.479361	0.586324	-0.354338	-0.0241192	0.255518	0.642342
cg17022830	-0.000918905	chr11	65203222	OpenSea			TRUE					-1.15883	-0.110729	0.0039581	0.0300734
cg07236912	-0.000994034	chr4	95429383	OpenSea	Body;Body;Body;Body;Body	PDLIM5;PDLIM5;PDLIM5;PDLIM5;PDLIM5	TRUE	PDLIM5|10611	0.237186	0.000527817	0.00223191	-0.233881	-0.0118518	0.411934	0.809254
cg03567939	-0.00132883	chr7	151506147	OpenSea	5'UTR;Body	PRKAG2;PRKAG2		PRKAG2|51422	0.0736235	0.288245	0.418238	1.44101	0.105391	0.00022571	0.00330927
cg14178043	-0.00147489	chr1	223921358	OpenSea	Body;Body	CAPN2;CAPN2	TRUE	CAPN2|824	-0.368929	3.58853e-08	5.31103e-07	-0.279405	-0.0248298	0.35278	0.756598
cg06428425	-0.00154483	chr21	44837027	Island	Body	SIK1		SIK1|150094	-0.102582	0.138447	0.235519	-0.0197261	-0.000850038	0.954116	0.994684
cg05972185	-0.00161172	chr16	72972644	OpenSea	Body;Body	ZFHX3;ZFHX3	TRUE	ZFHX3|463	-0.0271898	0.695252	0.773664	-1.36508	-0.105389	0.00177317	0.016166
cg15952840	-0.00172671	chr8	11451312	OpenSea								-2.35191	-0.382707	3.50002e-06	0.000150077
cg05616379	-0.00189912	chr2	26943660	OpenSea	Body	KCNK3	TRUE	KCNK3|3777	-0.366682	4.40311e-08	5.92419e-07	-0.543651	-0.0556119	0.0762883	0.288198
cg12460175	-0.00191136	chr22	18268062	Island								0.307334	0.00635637	0.169649	0.5012
cg01243513	-0.0020991	chr12	58003151	N_Shore	3'UTR;TSS1500	DTX3;GEFT		DTX3|196403	0.0546106	0.431137	0.559722	-0.0487995	-0.00838738	0.781941	0.96805
cg04264002	-0.00210927	chr14	103592734	N_Shore	5'UTR;1stExon	TNFAIP2;TNFAIP2		TNFAIP2|7127	-0.42951	7.76203e-11	1.91463e-09	0.907697	0.137101	0.0023503	0.0201077
cg18703983	-0.00218395	chr2	18097337	OpenSea	5'UTR	KCNS3	TRUE	KCNS3|3790	-0.150536	0.0291913	0.0635341	-0.211115	-0.0194397	0.714938	0.952269
cg02198582	-0.00282028	chr16	2099376	S_Shore	Body;Body;Body	TSC2;TSC2;TSC2		TSC2|7249	-0.293558	1.53001e-05	0.000102928	-1.21176	-0.162208	0.000171718	0.00268837
cg25137841	-0.00282376	chr22	31536585	OpenSea	TSS200	PLA2G3	TRUE	PLA2G3|50487	-0.715288	3.27546e-34	4.84769e-32	-0.185054	-0.0308901	0.508468	0.87263
cg06737308	-0.00293606	chr4	185021514	S_Shelf	Body	ENPP6	TRUE	ENPP6|133121	0.19313	0.00497712	0.0153461	0.0660505	0.00265358	0.864269	0.98307
cg26571759	-0.00312928	chr6	32011583	OpenSea	Body;Body	TNXB;TNXB		TNXB|7148	0.0911367	0.188324	0.28734	-1.38029	-0.190624	0.00386355	0.0295246
cg06430465	-0.00319417	chr16	1014935	Island	Body	LMF1		LMF1|64788	-0.098367	0.155488	0.254316	-1.43561	-0.0826071	0.117356	0.391017
cg05692899	-0.00334477	chr18	77342368	S_Shelf								-1.53304	-0.152662	0.00194502	0.0173609
cg05881745	-0.00334715	chr4	1409557	S_Shore								1.64164	0.203177	0.00158764	0.0148391
cg26286839	-0.00335845	chr5	79378955	OpenSea	Body	THBS4	TRUE	THBS4|7060	0.096956	0.161531	0.25706	0.0342354	0.000712576	0.871737	0.984243
cg09049436	-0.00355921	chr5	178854758	OpenSea								-0.586923	-0.0909288	0.0910092	0.326947
cg26477746	-0.00362679	chr16	3727482	S_Shelf	Body	TRAP1		TRAP1|10131	-0.179292	0.00921929	0.0257444	0.0309516	0.0034832	0.932291	0.992241
cg19368031	-0.00368872	chr10	76688843	OpenSea	Body	MYST4	TRUE					-0.076492	-0.00360518	0.814101	0.974516
cg00796821	-0.00373517	chr7	128551757	S_Shore	TSS1500;TSS1500	KCP;KCP		KCP|375616	0.00279672	0.967865	0.974449	0.540378	0.0580253	0.292276	0.690492
cg04284063	-0.00427768	chr5	126117999	S_Shelf	Body	LMNB1		LMNB1|4001	-0.256529	0.00017103	0.000904015	-1.02047	-0.162675	0.0508301	0.213174
cg18384106	-0.00443037	chr16	89315320	Island								0.520386	0.0339964	0.212842	0.577363
cg06222206	-0.00445725	chr10	135278165	N_Shore	Body	LOC619207						0.607232	0.0523176	0.104828	0.361444
cg07491979	-0.00449339	chr7	133331646	OpenSea	Body	EXOC4	TRUE	EXOC4|60412	0.0190543	0.7837	0.834443	0.00850339	0.00262495	0.979544	0.997856
cg17560586	-0.00471425	chr7	139257818	OpenSea	Body;Body	HIPK2;HIPK2		HIPK2|28996	0.403887	1.21005e-09	2.5584e-08	0.27983	0.017222	0.40014	0.799661
cg07143805	-0.00473707	chr20	56286671	S_Shore	TSS1500;TSS1500;TSS200	PMEPA1;PMEPA1;PMEPA1		PMEPA1|56937	-0.100237	0.147744	0.245687	0.0458012	0.00791399	0.837738	0.978636
cg26657242	-0.00498354	chr7	1488315	N_Shelf	Body	MICALL2	TRUE	MICALL2|79778	-0.20109	0.00342658	0.0115258	-0.446651	-0.0592985	0.103309	0.357762
cg01419499	-0.00509837	chr8	132935411	OpenSea	Body	EFR3A	TRUE	EFR3A|23167	-0.0684018	0.3239	0.456544	0.397456	0.0296697	0.147282	0.456737
cg10110957	-0.00546826	chr16	89460751	S_Shelf	5'UTR	ANKRD11	TRUE	ANKRD11|29123	-0.182959	0.00786132	0.0228132	0.478739	0.0734195	0.126553	0.411955
cg08733957	-0.00559539	chr1	24125298	N_Shore	Body;Body;Body	GALE;GALE;GALE		GALE|2582	-0.443419	1.58215e-11	4.68317e-10	-0.343785	-0.0317755	0.120493	0.398196
cg19996221	-0.00570611	chr15	73893431	OpenSea	Body;Body;Body;Body	NPTN;NPTN;NPTN;NPTN	TRUE	NPTN|27020	-0.223423	0.00111535	0.0042326
cg11584499	-0.00590775	chr1	38322941	N_Shelf	Body	MTF1		MTF1|4520	0.061694	0.373712	0.498282	-0.236367	-0.00938887	0.25922	0.647468
cg15083845	-0.00616916	chr5	1113624	S_Shore	TSS1500	SLC12A7		SLC12A7|10723	-0.0437697	0.528172	0.625355	0.0947966	0.00841145	0.805196	0.972883
cg00719072	-0.00644834	chr21	44838396	N_Shore	Body	SIK1		SIK1|150094	0.0159728	0.818013	0.864757	-0.197971	-0.0283754	0.514696	0.876029
cg14843670	-0.00664955	chr1	233319053	OpenSea	Body	PCNXL2	TRUE	PCNXL2|80003	0.289767	1.99056e-05	0.000122751	-0.570281	-0.0667149	0.0417175	0.183725
cg17955557	-0.00677746	chr5	148681591	OpenSea	Body;Body	AFAP1L1;AFAP1L1	TRUE	AFAP1L1|134265	0.0642929	0.35388	0.486192	0.483754	0.0599207	0.190115	0.538719
cg02776628	-0.00689951	chr6	37465322	N_Shelf	Body	C6orf129						-1.61866	-0.175554	0.000177736	0.00275869
cg01166604	-0.00699891	chr17	79248051	OpenSea	Body;Body	SLC38A10;SLC38A10		SLC38A10|124565	-0.0486147	0.483488	0.586324	0.983969	0.053632	0.0238606	0.120399
cg01642723	-0.00704885	chr12	132869052	N_Shelf	Body	GALNT9		GALNT9|50614	0.0225246	0.745555	0.817349	0.744888	0.102144	0.19933	0.554725
cg19149785	-0.00727591	chr19	51506273	Island	3'UTR;TSS1500;TSS1500;TSS1500;TSS1500	KLK9;KLK8;KLK8;KLK8;KLK8		KLK9|284366	0.109276	0.114373	0.199144	-0.0159434	-0.0008195	0.954251	0.994684
cg19149785	-0.00727591	chr19	51506273	Island	3'UTR;TSS1500;TSS1500;TSS1500;TSS1500	KLK9;KLK8;KLK8;KLK8;KLK8		KLK8|11202	0.0598915	0.387859	0.512528	-0.0159434	-0.0008195	0.954251	0.994684
cg21002264	-0.00740223	chr17	8091665	N_Shore	3'UTR;1stExon	C17orf59;C17orf59		C17orf59|54785	-0.0905564	0.191164	0.288697
cg26272125	-0.00746599	chr1	27662075	OpenSea	3'UTR	TMEM222		TMEM222|84065	-0.0632928	0.361432	0.48629	-0.0794685	-0.00342987	0.760965	0.963426
cg24082440	-0.00814175	chr21	33672186	N_Shore	Body;Body	MRAP;MRAP		MRAP|56246	-0.0153677	0.824795	0.865742	-0.226322	-0.0117609	0.431312	0.823897
cg12093241	-0.00821707	chr6	157465138	OpenSea	Body;Body;Body	ARID1B;ARID1B;ARID1B	TRUE	ARID1B|57492	-0.140274	0.0422869	0.0881473	0.102009	0.00527612	0.651532	0.933727
cg21331335	-0.00824676	chr9	2717325	N_Shore	TSS200	KCNV2		KCNV2|169522	-0.101742	0.141724	0.238354	0.131932	0.00549458	0.525578	0.881614
cg13025283	-0.00834351	chr12	76896350	OpenSea	5'UTR;5'UTR	OSBPL8;OSBPL8		OSBPL8|114882	0.150122	0.0296429	0.0635819	-0.119517	-0.0203961	0.516441	0.876911
cg27575052	-0.0085481	chr16	29855904	Island	Body;Body	MVP;MVP		MVP|9961	-0.198794	0.00382146	0.0125684	1.84784	0.223151	4.8217e-08	7.76517e-06
cg12988946	-0.00855921	chr13	33698368	OpenSea	Body;Body;Body	STARD13;STARD13;STARD13	TRUE	STARD13|90627	0.00764577	0.9123	0.931175	-0.05467	-0.00236622	0.82241	0.976087
cg00138126	-0.00919765	chr20	56286697	S_Shore	TSS1500;TSS1500;TSS200	PMEPA1;PMEPA1;PMEPA1		PMEPA1|56937	-0.160728	0.0197833	0.0504815	-0.573255	-0.0987747	0.0294657	0.141395
cg07716603	-0.00959469	chr3	10205719	N_Shore	TSS1500	IRAK2		IRAK2|3656	-0.169623	0.013845	0.0372557	-0.562501	-0.0663091	0.147722	0.457633
cg14876906	-0.00960475	chr2	170658438	S_Shelf	Body	SSB		SSB|6741	0.0916388	0.185891	0.28734
cg15432510	-0.0103534	chr17	78939670	N_Shore	3'UTR;3'UTR	RPTOR;RPTOR		RPTOR|57521	0.191116	0.0054584	0.0161569	-0.553789	-0.0381316	0.432672	0.824842
cg02862897	-0.0104761	chr17	79793088	S_Shore	TSS200	DYSFIP1						-0.0028288	-0.000281533	0.992205	0.999154
cg26650651	-0.010685	chr7	99723100	N_Shore	3'UTR;TSS1500	CNPY4;MBLAC1		MBLAC1|255374	0.0484592	0.48489	0.586324	0.0221029	0.000741391	0.927351	0.991631
cg26650651	-0.010685	chr7	99723100	N_Shore	3'UTR;TSS1500	CNPY4;MBLAC1		CNPY4|245812	-0.0503932	0.467612	0.586324	0.0221029	0.000741391	0.927351	0.991631
cg18228933	-0.0108501	chr2	240170936	OpenSea	Body	HDAC4		HDAC4|9759	-0.157803	0.0221675	0.0537834	0.361065	0.0208996	0.325128	0.727851
cg22354618	-0.0111704	chr18	8800458	OpenSea	Body	KIAA0802						-1.84169	-0.187501	0.000114891	0.00198225
cg12634602	-0.0120389	chr6	149554024	OpenSea			TRUE					0.202088	0.0178848	0.434133	0.825954
cg08094784	-0.012309	chr22	42976149	N_Shore	Body	RRP7B		RRP7B|91695	-0.216587	0.00159138	0.00574451
cg07022343	-0.0133334	chr1	230208170	S_Shelf	Body	GALNT2	TRUE	GALNT2|2590	-0.206915	0.00258453	0.0091074	-0.710717	-0.120701	0.0053771	0.0381547
cg05663173	-0.0137667	chr2	54853229	N_Shelf	Body;Body	SPTBN1;SPTBN1		SPTBN1|6711	0.0536701	0.439126	0.565137	-0.169965	-0.00520651	0.636516	0.92859
cg27596275	-0.0145512	chr11	124971707	OpenSea	Body	TMEM218		TMEM218|219854	0.11292	0.102718	0.184825	-0.147619	-0.0214561	0.630172	0.92646
cg18013299	-0.0145786	chr11	61170469	OpenSea	3'UTR;3'UTR;3'UTR	CPSF7;CPSF7;CPSF7		CPSF7|79869	0.227028	0.000920747	0.00368299	0.413028	0.0204439	0.094886	0.336867
cg26333450	-0.0148613	chr5	141139633	OpenSea			TRUE					0.121751	0.00403839	0.783329	0.968275
cg16538390	-0.0151311	chr10	135344917	S_Shelf	Body	CYP2E1		CYP2E1|1571	0.358944	8.80036e-08	9.30323e-07	-0.706262	-0.072068	0.153142	0.46881
cg23849099	-0.0151468	chr10	3457441	OpenSea								-0.0349741	-0.00535767	0.902657	0.988397
cg03595626	-0.0152713	chr18	29127091	OpenSea	3'UTR	DSG2		DSG2|1829	-0.00379957	0.956352	0.969452	-0.0427308	-0.00177901	0.90616	0.988851
cg23418671	-0.0161647	chr10	134671250	N_Shore								-0.297544	-0.0239466	0.505436	0.871057
cg08878651	-0.0165558	chr17	30066757	OpenSea			TRUE					-0.167609	-0.00664205	0.533184	0.885464
cg02481000	-0.0167111	chr1	2082349	Island	Body;Body;Body	PRKCZ;PRKCZ;PRKCZ		PRKCZ|5590	-0.102719	0.137921	0.235519	0.160292	0.00913045	0.678599	0.942134
cg12723829	-0.0168788	chr10	135270925	Island	Body	LOC619207						0.315767	0.036303	0.572134	0.903876
cg02358790	-0.0173595	chr12	106681933	OpenSea			TRUE					0.16269	0.0102113	0.580162	0.907279
cg02358190	-0.0179143	chr5	66187002	OpenSea	Body;Body;Body	MAST4;MAST4;MAST4	TRUE	MAST4|375449	0.0770361	0.266419	0.390395	0.162608	0.0169918	0.651404	0.933694
cg10493075	-0.0183685	chr14	100655244	N_Shelf								0.119782	0.00796205	0.747757	0.960477
cg21649325	-0.0185757	chr7	138820966	S_Shelf	Body;Body;Body	TTC26;TTC26;TTC26		TTC26|79989	0.112616	0.103652	0.184825	0.348061	0.0184636	0.454499	0.840006
cg12854656	-0.0191724	chr5	131347999	S_Shore	TSS1500;TSS1500	ACSL6;ACSL6		ACSL6|23305	0.0315227	0.64969	0.734001	-0.0299531	-0.00159613	0.925421	0.991343
cg08464374	-0.0194472	chr1	1477123	S_Shore	3'UTR;TSS1500	SSU72;C1orf70		SSU72|29101	-0.120844	0.0806113	0.152955	-0.124318	-0.00275759	0.690803	0.945563
cg10929873	-0.0214988	chr12	124972783	OpenSea	Body;Body	NCOR2;NCOR2	TRUE	NCOR2|9612	-0.170501	0.0133538	0.0365992
cg27333283	-0.0223732	chr16	19514279	OpenSea	3'UTR	GDE1		GDE1|51573	-0.248812	0.000271014	0.00123336	-0.136636	-0.0216815	0.672758	0.940474
cg26690297	-0.0226689	chr1	1477098	S_Shore	3'UTR;TSS1500	SSU72;C1orf70		SSU72|29101	-0.180559	0.00872814	0.0248416	0.199423	0.0210071	0.54993	0.893763
cg21561057	-0.0231507	chr19	40711866	Island	Body	MAP3K10		MAP3K10|4294	0.142947	0.038473	0.0813429
cg06437173	-0.0232586	chr10	50666820	OpenSea	3'UTR	ERCC6		ERCC6|2074	-0.00854638	0.902019	0.927075	-0.453	-0.0314601	0.16379	0.490125
cg23240589	-0.0244913	chr2	55217063	OpenSea	Body;Body;Body;Body;Body	RTN4;RTN4;RTN4;RTN4;RTN4	TRUE	RTN4|57142	-0.0291891	0.67408	0.755786	-0.583387	-0.0353874	0.101371	0.352944
cg06573254	-0.0255682	chr5	174909270	S_Shelf	5'UTR	SFXN1		SFXN1|94081	-0.204277	0.00293939	0.010117	-0.140027	-0.00729327	0.633702	0.927718
cg07810967	-0.0264169	chr5	131993925	S_Shore	1stExon	IL13		IL13|3596	0.000269713	0.9969	0.9969	-0.0109117	-0.00036331	0.968608	0.996527
cg17456097	-0.0278196	chr1	26900765	OpenSea	3'UTR;3'UTR	RPS6KA1;RPS6KA1		RPS6KA1|6195	-0.216881	0.00156764	0.00574451	-0.246982	-0.0173609	0.440849	0.83059
cg18643383	-0.0287373	chr2	69864882	OpenSea	Body	AAK1	TRUE	AAK1|22848	0.118855	0.0857616	0.160667	-0.456845	-0.0321891	0.0684592	0.266176
cg10698255	-0.0297469	chr17	4594639	OpenSea	Body	PELP1	TRUE	PELP1|27043	-0.0730685	0.291904	0.419435	-0.18992	-0.0133364	0.573187	0.904322
cg01210622	-0.0329518	chr16	68405731	Island	Body	SMPD3		SMPD3|55512	0.0981585	0.15637	0.254316	-1.3271	-0.177625	0.00831727	0.0534875
cg00630399	-0.0339585	chr6	30952874	OpenSea	Body	MUC21		MUC21|394263	0.0350926	0.613095	0.708891	-0.0925021	-0.00358889	0.760554	0.963323
cg18993778	-0.0344765	chr7	139313985	OpenSea	Body;Body	HIPK2;HIPK2	TRUE	HIPK2|28996	0.542935	1.69316e-17	1.25294e-15	1.0935	0.0925626	0.000480991	0.00591363
cg10156552	-0.0397	chr20	49576836	S_Shore	1stExon;3'UTR	MOCS3;MOCS3		MOCS3|27304	-0.0475631	0.49301	0.588432	0.00591914	0.00029302	0.983165	0.99828
cg20450337	-0.0399762	chr19	5227946	N_Shore	Body;Body;Body;Body	PTPRS;PTPRS;PTPRS;PTPRS		PTPRS|5802	0.124491	0.0718144	0.138033	-0.195365	-0.0170954	0.488396	0.86139
cg16987761	-0.0463494	chr4	3318072	N_Shore	Body;Body	RGS12;RGS12		RGS12|6002	-0.0488698	0.481194	0.586324	-0.464219	-0.0258144	0.155035	0.472706
cg00435408	-0.0530171	chr16	57220662	S_Shore	TSS1500;5'UTR	FAM192A;RSPRY1		RSPRY1|89970	-0.138788	0.0445415	0.0915575	0.127496	0.00374582	0.554718	0.89602
cg00435408	-0.0530171	chr16	57220662	S_Shore	TSS1500;5'UTR	FAM192A;RSPRY1		FAM192A|80011	-0.248563	0.000275005	0.00123336	0.127496	0.00374582	0.554718	0.89602
cg22763590	-0.057087	chr7	139373966	OpenSea	Body;Body	HIPK2;HIPK2	TRUE	HIPK2|28996	0.252653	0.000215908	0.00106515	-0.138227	-0.00641866	0.598563	0.914607
cg26841929	-0.0646285	chr22	50627237	N_Shore	5'UTR	TRABD		TRABD|80305	-0.132877	0.0545295	0.106189	-0.285997	-0.0167322	0.431221	0.823844
