# Supplementary material for: Candidate methylation sites associated with endocrine therapy resistance in ER+/HER2- breast cancer
Source: BMC Cancer. 2020 Jul 19;20:676. doi: 10.1186/s12885-020-07100-z (PMC7368985; doi:10.1186/s12885-020-07100-z)
Supplement: Supplementary file 8 — Additional file 8. Survival analysis using risk score. Results of survival analysis of the multi-locus signature using the risk score corrected for selected clinical variables in ER+/HER2-, TAM and AI cohorts. [file 12885_2020_7100_MOESM8_ESM.xlsx]

## Sheet: ER+HER2-
Additional file 8 – Results of survival analysis of the multi-locus signature using the risk score corrected for clinical variables, ER+/HER2- cohort
HR, hazard ratio; CI, confidence interval
	log(HR)	CI (lo 95)	CI (hi 95)	HR	CI (lo 95)	CI (hi 95)	P-value
Stage (per stage increment)	0.376835	-0.0493598	0.80303	1.45766	0.951839	2.2323	0.0227558
Age (per 1-yr increment)	0.0133832	-0.00550828	0.0322747	1.01347	0.994507	1.0328	0.0680337
AI treatment (vs. no AI treatment)	-0.19484	-0.7803	0.390621	0.822967	0.458268	1.4779	0.391318
Risk score (per risk score increment)	2.77269	2.21748	3.32791	16.0017	9.18419	27.8799	0

## Sheet: TAM
Additional file 8 – Results of survival analysis of the multi-locus signature using the risk score corrected for clinical variables, TAM cohort
HR, hazard ratio; CI, confidence interval
	log(HR)	CI (lo 95)	CI (hi 95)	HR	CI (lo 95)	CI (hi 95)	P-value
Stage (per stage increment)	0.413728	-0.230975	1.05843	1.51244	0.793759	2.88184	0.208473
Age (per 1-yr increment)	0.026519	-0.00495916	0.0579972	1.02687	0.995053	1.05971	0.0987007
Risk score (per risk score increment)	3.21696	2.36485	4.06908	24.9522	10.6424	58.5029	1.36806e-13

## Sheet: AI
Additional file 8 – Results of survival analysis of the multi-locus signature using the risk score corrected for clinical variables, AI cohort
HR, hazard ratio; CI, confidence interval
	log(HR)	CI (lo 95)	CI (hi 95)	HR	CI (lo 95)	CI (hi 95)	P-value
Stage (per stage increment)	-0.00555137	-0.554948	0.543845	0.994464	0.574102	1.72262	0.984199
Age (per 1-yr increment)	-0.000689766	-0.0327551	0.0313756	0.99931	0.967775	1.03187	0.96637
Risk score (per risk score increment)	3.3898	2.57424	4.20536	29.6599	13.1213	67.0445	3.74863e-16
