# Supplementary material for: Candidate methylation sites associated with endocrine therapy resistance in ER+/HER2- breast cancer
Source: BMC Cancer. 2020 Jul 19;20:676. doi: 10.1186/s12885-020-07100-z (PMC7368985; doi:10.1186/s12885-020-07100-z)
Supplement: Supplementary file 10 — Additional file 10. Stability of multi-locus signatures. Results of Fisher’s exact test to determine the significance of the overlap between the original multi-locus signature and the stability signature. [file 12885_2020_7100_MOESM10_ESM.xlsx]

## Sheet: STABILITY(in at least 6)
Additional file 10 – Stability of multi-locus signatures (presence in at least 6 signatures)
Results of Fisher's exact test to determine the significance of the overlap between the original multi-locus signature and the stability signature.
The stability signature consists of those CpGs that occurred in at least 6 of the 30 10% leave-out signatures.
"Total count" is the number of the CpGs that appear in the elastic net signature or in at least 1 (out of 30) signatures used to assess the stability.
ER+/HER2-	In multi-locus signature	Not in multi-locus signature		P-value	2.2e-16
In stability signature	180	39		Odds ratio	131.921
Not in stability signature	23	669		Confidence interval	75.7358	241.121
				Total count	911
TAM	In multi-locus signature	Not in multi-locus signature		P-value	2.2e-16
In stability signature	36	36		Odds ratio	Inf
Not in stability signature	0	531		Confidence interval	127.46	Inf
				Total count	603
AI	In multi-locus signature	Not in multi-locus signature		P-value	2.2e-16
In stability signature	160	34		Odds ratio	141.575
Not in stability signature	18	551		Confidence interval	76.4533	276.815
				Total count	763

## Sheet: STABILITY(in at least 21)
Additional file 10 – Stability of multi-locus signatures (presence in at least 21 signatures)
Results of Fisher's exact test to determine the significance of the overlap between the original multi-locus signature and the stability signature.
The stability signature consists of those CpGs that occurred in at least 21 of the 30 10% leave-out signatures.
"Total count" is the number of the CpGs that appear in the elastic net signature or in at least 1 (out of 30) signatures used to assess the stability.
ER+/HER2-	In multi-locus signature	Not in multi-locus signature		P-value	2.2e-16
In stability signature	29	0		Odds ratio	Inf
Not in stability signature	174	708		Confidence interval	29.4793	Inf
				Total count	911
TAM	In multi-locus signature	Not in multi-locus signature		P-value	1.503e-09
In stability signature	7	0		Odds ratio	Inf
Not in stability signature	29	567		Confidence interval	26.1622	Inf
				Total count	603
AI	In multi-locus signature	Not in multi-locus signature		P-value	0.01253
In stability signature	3	0		Odds ratio	Inf
Not in stability signature	175	585		Confidence interval	1.3664	Inf
				Total count	763
