# Supplementary material for: Candidate methylation sites associated with endocrine therapy resistance in ER+/HER2- breast cancer
Source: BMC Cancer. 2020 Jul 19;20:676. doi: 10.1186/s12885-020-07100-z (PMC7368985; doi:10.1186/s12885-020-07100-z)
Supplement: Supplementary file 13 — Additional file 13. Survival analyses including luminal status. Reanalysis when also including luminal status in the (i) multivariable survival analysis, (ii) single-locus survival analysis, and (iii) risk score for the multi-locus signature. [file 12885_2020_7100_MOESM13_ESM.xlsx]

## Sheet: Clinical
Additional file 13 – Results of multivariable survival analysis for clinical variables including luminal status
Multivariable Cox proportional hazards model for clinical variables (ER+/HER2- cohort). HR, hazard ratio; CI, 95% confidence interval; AI: aromatase inhibitor.
	HR	95% CI	P-value
Stage (per stage increment)	2.23	1.65-3.01	1.72e-07
Age (per 1-yr increment)	1.04	1.02-1.05	1.05e-06
AI treatment (vs. no AI treatment)	0.61	0.40-0.94	0.026629
Luminal B subtype (vs. luminal A)	2.45	1.30 -4.60	0.0055992

## Sheet: ER+HER2- (single-locus)
Additional file 13 – Results of single-locus survival analysis adjusted for clinical variables without/with luminal status, ER+/HER2- cohort
Annotation based on IlluminaHumanMethylation450kanno.ilmn12.hg19 R package
HR, hazard ratio; CI, confidence interval; Adj. P-value, Benjamini-Hochberg adjusted P-value; pos, position on the chromosome (indicated in column 'chr')
All columns except column H (P-value (lum.) and column I (Adj. P-value (lum.)) are for the single-locus analysis without adjusting for luminal status (see Additional File 4)
	Not in original signature (without adjusting for luminal status)
	In both signatures
	Not in signature after correction for luminal status
CpG ID	log(HR)	HR	CI (lo 95)	CI (hi 95)	P-value	Adj. P-value	P-value (lum.)	Adj. P-value (lum.)	chr	pos	Relation_to_Island	UCSC_RefGene_Group	UCSC_RefGene_Name	Enhancer
cg10296162	0.800902	2.22755	1.41374	3.50983	0.000555421	0.153461	4.60046e-05	0.0496453	chr12	14956242	Island	TSS1500;5'UTR	C12orf60;WBP11
cg18240331	0.676035	1.96607	1.43999	2.68433	2.09024e-05	0.0499947	6.04108e-06	0.0224031	chr6	10419927	Island	TSS200	TFAP2A
cg00523812	0.580391	1.78674	1.31567	2.42647	0.000201675	0.111444	2.30209e-05	0.03826	chr7	130081019	Island	TSS200	TSGA14
cg15571730	0.541917	1.7193	1.31858	2.24179	6.26421e-05	0.0749143	5.58942e-06	0.0221164	chr7	99680278	S_Shore	TSS1500;TSS1500	ZNF3;ZNF3
cg26968387	0.541297	1.71823	1.33872	2.20533	2.12983e-05	0.0500866	1.93498e-05	0.0372147	chr19	37569268	Island	TSS200	ZNF420
cg22872179	0.530857	1.70039	1.30825	2.21007	7.22641e-05	0.0792641	3.87679e-05	0.0473978	chr3	136580959	Island	TSS200	NCK1
cg00838399	0.506301	1.65914	1.28916	2.13531	8.39077e-05	0.0824931	2.5409e-05	0.03889	chr19	56154867	Island	TSS200	ZNF581
cg19493827	0.496631	1.64318	1.28573	2.1	7.24701e-05	0.0792641	3.78645e-05	0.0472207	chr11	118966130	Island	1stExon;5'UTR	H2AFX;H2AFX
cg09483904	0.472191	1.6035	1.30529	1.96986	6.87181e-06	0.0328826	8.62825e-06	0.0271117	chr6	33172551	Island	Body	HSD17B8
cg15389490	0.41439	1.51345	1.25518	1.82485	1.42014e-05	0.0421445	1.46327e-05	0.0347652	chr6	33172333	Island	TSS200	HSD17B8
cg16712664	0.386667	1.47207	1.2317	1.75934	2.1276e-05	0.0500866	1.44861e-05	0.0347652	chr16	30787355	Island
cg22647810	0.342118	1.40793	1.19266	1.66205	5.32141e-05	0.0705964	4.38497e-05	0.0486901	chr6	33172371	Island	TSS200	HSD17B8
cg07420163	0.189046	1.2081	1.09855	1.32856	9.6942e-05	0.0860633	3.86165e-05	0.0473978	chr16	89778301	Island	Body	C16orf7	TRUE
cg03281139	-0.2643	0.767743	0.676487	0.871309	4.24666e-05	0.0652212	1.84971e-05	0.0372147	chr19	3451135	N_Shore	Body;Body	NFIC;NFIC	TRUE
cg07209987	-0.295738	0.743982	0.64847	0.853562	2.45885e-05	0.0515078	2.59561e-05	0.0392408	chr1	10221203	OpenSea	Body;Body	UBE4B;UBE4B	TRUE
cg26031954	-0.310695	0.732938	0.637634	0.842486	1.23337e-05	0.0391386	4.59352e-06	0.0194061	chr1	2139327	S_Shore	TSS200	C1orf86
cg09499849	-0.318208	0.727452	0.59583	0.888149	0.00177962	0.219967	2.82592e-05	0.0404339	chr2	158695158	OpenSea	5'UTR;5'UTR	ACVR1;ACVR1	TRUE
cg20379593	-0.319945	0.726189	0.628957	0.838453	1.28674e-05	0.0400395	3.36521e-05	0.0440229	chr11	65198023	OpenSea
cg13969327	-0.325154	0.722416	0.622409	0.838492	1.89438e-05	0.0478458	0.000166894	0.0761428	chr7	127526253	OpenSea	Body	SND1	TRUE
cg12925881	-0.340356	0.711517	0.59153	0.855842	0.000303878	0.127705	1.55694e-05	0.0351413	chr4	26050407	OpenSea			TRUE
cg01846046	-0.340851	0.711165	0.615472	0.821736	3.78756e-06	0.0265506	4.28695e-05	0.0486901	chr11	64034019	N_Shore	Body	PLCB3
cg10799386	-0.3411	0.710988	0.607934	0.831511	1.95998e-05	0.0483218	0.000225274	0.0833734	chr10	108332882	OpenSea			TRUE
cg05915866	-0.34348	0.709297	0.608853	0.826313	1.03976e-05	0.0367465	0.000223493	0.0833734	chr16	73090838	N_Shore	5'UTR	ZFHX3
cg10752190	-0.347235	0.706639	0.570419	0.875388	0.00148281	0.20881	2.36528e-05	0.03826	chr17	9604414	OpenSea	Body	USP43
cg10109635	-0.350556	0.704296	0.562122	0.88243	0.00231007	0.239974	2.37214e-05	0.03826	chr17	20203992	OpenSea	Body;Body	CYTSB;CYTSB	TRUE
cg02668218	-0.352814	0.702708	0.584977	0.844133	0.000162529	0.100733	2.56616e-05	0.0389794	chr20	2191729	S_Shelf
cg09407859	-0.354275	0.701682	0.598163	0.823117	1.3604e-05	0.0411334	0.000154832	0.074664	chr16	66995461	OpenSea	Body	CES3
cg16809293	-0.357161	0.69966	0.565804	0.865183	0.000978622	0.182888	3.81849e-05	0.0472526	chr10	134246620	OpenSea
cg13725599	-0.358103	0.699001	0.535013	0.913253	0.00866053	0.357352	4.26814e-05	0.0486901	chr20	3052262	Island	TSS200	OXT
cg12940993	-0.364988	0.694205	0.571398	0.843405	0.000238276	0.118805	2.1894e-05	0.03826	chr14	21271148	OpenSea	TSS200;TSS200;TSS1500;TSS200	RNASE1;RNASE1;RNASE1;RNASE1
cg23121785	-0.368288	0.691918	0.592042	0.808643	3.64997e-06	0.0265506	3.5186e-06	0.0171992	chr15	79501491	OpenSea	TSS1500	MIR184
cg08975197	-0.376962	0.685942	0.580341	0.810759	9.89652e-06	0.0367465	2.28441e-05	0.03826	chr12	70173946	OpenSea	Body;Body;5'UTR;Body;Body	RAB3IP;RAB3IP;RAB3IP;RAB3IP;RAB3IP
cg20151221	-0.377953	0.685263	0.548155	0.856666	0.000906012	0.178942	3.03909e-06	0.0171992	chr11	325030	OpenSea
cg11150191	-0.380196	0.683727	0.561688	0.832281	0.000150615	0.0995316	3.6941e-06	0.0171992	chr14	94391285	OpenSea	5'UTR;Body	FAM181A;C14orf86
cg23016243	-0.380737	0.683357	0.574466	0.81289	1.71498e-05	0.0465016	4.47851e-05	0.048933	chr17	42983768	OpenSea	3'UTR	GFAP	TRUE
cg09764761	-0.38274	0.68199	0.559986	0.830576	0.000141304	0.0984531	2.05282e-05	0.0377921	chr17	44105544	OpenSea	3'UTR;3'UTR;3'UTR;3'UTR;3'UTR;3'UTR	MAPT;MAPT;MAPT;MAPT;MAPT;MAPT	TRUE
cg05511755	-0.383132	0.681723	0.502265	0.9253	0.0139688	0.4072	1.70953e-05	0.0360897	chr5	55366529	OpenSea			TRUE
cg09304968	-0.385438	0.680153	0.536971	0.861514	0.00139364	0.205126	1.73363e-05	0.0360897	chr7	76977748	OpenSea	Body	PION	TRUE
cg11204139	-0.385683	0.679986	0.561008	0.824197	8.48786e-05	0.0829388	4.05316e-05	0.0479216	chr17	3907470	Island			TRUE
cg25619717	-0.389892	0.67713	0.566266	0.809699	1.92076e-05	0.0480946	2.37556e-05	0.03826	chr5	114867569	OpenSea	Body	FEM1C	TRUE
cg22469870	-0.390237	0.676897	0.566842	0.808319	1.62881e-05	0.0452848	8.52053e-05	0.0605513	chr20	56272964	OpenSea	5'UTR;5'UTR;Body;Body	PMEPA1;PMEPA1;PMEPA1;PMEPA1	TRUE
cg14426167	-0.39116	0.676272	0.566297	0.807603	1.56175e-05	0.0446916	5.10516e-07	0.0107188	chr17	27972099	OpenSea	Body	SSH2	TRUE
cg17575314	-0.395111	0.673605	0.546801	0.829815	0.000204731	0.112194	3.37403e-06	0.0171992	chr10	71142526	OpenSea	Body;Body;Body;Body;Body	HK1;HK1;HK1;HK1;HK1	TRUE
cg23028740	-0.395268	0.6735	0.536298	0.845802	0.000671723	0.164296	3.73713e-05	0.0469552	chr1	244545617	OpenSea	Body	C1orf100	TRUE
cg07080244	-0.3988	0.671125	0.532521	0.845804	0.000727944	0.168211	1.8367e-05	0.0372147	chr11	120051676	OpenSea			TRUE
cg26279253	-0.399503	0.670653	0.528541	0.850976	0.00100853	0.185662	4.67e-05	0.0498238	chr12	89475286	OpenSea			TRUE
cg10416861	-0.399893	0.670392	0.560678	0.801575	1.15674e-05	0.0375287	0.000135833	0.0711358	chr11	65201834	OpenSea
cg04806177	-0.401948	0.669016	0.564045	0.793521	3.91491e-06	0.0265506	5.34622e-06	0.0215889	chr16	1991447	N_Shore	Body	SEPX1
cg02054252	-0.402095	0.668917	0.542261	0.825156	0.000173775	0.103518	2.43701e-05	0.0384703	chr12	50078554	OpenSea	Body;Body	FMNL3;FMNL3	TRUE
cg11229273	-0.402151	0.66888	0.545254	0.820536	0.00011477	0.0941331	3.34276e-06	0.0171992	chr3	57015101	OpenSea	Body	ARHGEF3	TRUE
cg25499746	-0.406559	0.665938	0.53038	0.836143	0.000463503	0.144088	1.33001e-05	0.0337692	chr6	16346054	OpenSea	5'UTR;5'UTR	ATXN1;ATXN1	TRUE
cg14818176	-0.409462	0.664007	0.559934	0.787424	2.50595e-06	0.0243384	1.68711e-05	0.0360897	chr17	73148480	N_Shore	5'UTR;Body;Body	HN1;HN1;HN1
cg06573254	-0.413464	0.661355	0.542108	0.806833	4.58596e-05	0.0672104	3.19418e-05	0.0426562	chr5	174909270	S_Shelf	5'UTR	SFXN1
cg02050973	-0.418856	0.657799	0.541591	0.798941	2.40846e-05	0.0514615	1.49336e-05	0.0347652	chr1	1852238	S_Shore	TSS1500	TMEM52
cg03753454	-0.420011	0.65704	0.545632	0.791195	9.39818e-06	0.0367465	2.64498e-05	0.039727	chr16	70787597	OpenSea	Body	VAC14
cg12331331	-0.422269	0.655557	0.532147	0.807588	7.24166e-05	0.0792641	1.98249e-06	0.0171992	chr2	10800098	OpenSea	Body	NOL10	TRUE
cg00305740	-0.422976	0.655094	0.495415	0.866239	0.00300407	0.258961	2.29476e-05	0.03826	chr7	73392697	OpenSea
cg20435464	-0.423903	0.654487	0.541772	0.790652	1.10364e-05	0.03711	2.72209e-05	0.0400203	chr19	40711928	Island	Body	MAP3K10
cg15228441	-0.425088	0.653712	0.554538	0.770622	4.10956e-07	0.00968515	1.89312e-06	0.0171992	chr17	78829930	N_Shore	Body;Body	RPTOR;RPTOR	TRUE
cg00087482	-0.42595	0.653149	0.532685	0.800854	4.22346e-05	0.0652212	2.94018e-05	0.0409135	chr7	99800121	OpenSea	Body;Body;3'UTR;Body	GATS;STAG3;GATS;GATS	TRUE
cg04285855	-0.426934	0.652506	0.532437	0.799652	3.87485e-05	0.0627119	2.99509e-05	0.0411991	chr14	105794185	N_Shelf	Body;Body	PACS2;PACS2
cg12535109	-0.428889	0.651232	0.506005	0.83814	0.00086374	0.177015	4.11922e-05	0.0481835	chr2	216708370	OpenSea			TRUE
cg25445431	-0.432073	0.649162	0.534007	0.789149	1.44621e-05	0.0425244	4.66815e-05	0.0498238	chr7	101630948	OpenSea	Body;Body;Body	CUX1;CUX1;CUX1
cg15026767	-0.432336	0.648992	0.505463	0.833276	0.000698456	0.166313	1.50244e-05	0.0347652	chr1	153521758	OpenSea	TSS200	S100A3
cg07373212	-0.433506	0.648232	0.54235	0.774785	1.89501e-06	0.0222821	3.60045e-06	0.0171992	chr3	126577851	OpenSea	Body	CHCHD6	TRUE
cg23475955	-0.435021	0.647251	0.533781	0.784843	9.71234e-06	0.0367465	2.77181e-06	0.0171992	chr11	1985762	N_Shore
cg10242198	-0.438844	0.644781	0.516001	0.805702	0.000113183	0.0934941	2.14015e-05	0.03826	chr13	111563046	N_Shelf	Body	ANKRD10
cg22073869	-0.442882	0.642183	0.482577	0.854577	0.00238223	0.241453	2.84763e-05	0.0404454	chr13	98866089	OpenSea	Body;Body	FARP1;FARP1	TRUE
cg06573088	-0.443861	0.641554	0.519711	0.791963	3.62141e-05	0.0617381	1.32131e-05	0.0337692	chr6	17492721	OpenSea	Body	CAP2	TRUE
cg20108600	-0.44763	0.639141	0.521119	0.783891	1.72656e-05	0.0465016	7.61078e-05	0.0586367	chr8	125464547	OpenSea	1stExon;3'UTR	TRMT12;TRMT12
cg15874390	-0.449205	0.638135	0.50697	0.803237	0.000130093	0.0957156	3.65342e-05	0.0468078	chr14	96752011	OpenSea	3'UTR	ATG2B	TRUE
cg24476165	-0.451702	0.636544	0.508023	0.797579	8.65323e-05	0.0831958	2.88518e-05	0.0406848	chr8	131234799	OpenSea	Body	ASAP1	TRUE
cg09198866	-0.452024	0.636339	0.521045	0.777144	9.3334e-06	0.0367465	4.42603e-05	0.0486901	chr22	36809318	S_Shelf
cg06484100	-0.452026	0.636338	0.509802	0.794279	6.44022e-05	0.0761666	2.5928e-06	0.0171992	chr17	41799087	S_Shore			TRUE
cg10300814	-0.455056	0.634412	0.520814	0.772789	6.17466e-06	0.0328826	9.28905e-06	0.0284271	chr6	35565116	OpenSea	Body;Body;Body;Body	FKBP5;FKBP5;FKBP5;FKBP5	TRUE
cg02305251	-0.455149	0.634354	0.503726	0.798856	0.000109319	0.0914811	3.73628e-05	0.0469552	chr12	57388441	OpenSea	5'UTR	GPR182
cg06526681	-0.45566	0.634029	0.476426	0.843769	0.00177799	0.219967	4.43485e-05	0.0486901	chr6	116573109	N_Shore	3'UTR;1stExon	TSPYL4;TSPYL4	TRUE
cg21561057	-0.456234	0.633666	0.522602	0.768332	3.47831e-06	0.0265506	1.17116e-05	0.0323587	chr19	40711866	Island	Body	MAP3K10
cg06651376	-0.456329	0.633605	0.46866	0.856603	0.00301713	0.259166	3.2709e-05	0.0430565	chr17	1690794	OpenSea	Body	SMYD4	TRUE
cg01392656	-0.457427	0.63291	0.525341	0.762505	1.4881e-06	0.0197808	1.09625e-06	0.013013	chr12	125578483	Island	Body	AACS
cg23666374	-0.457974	0.632564	0.522076	0.766435	2.92792e-06	0.0260231	3.93766e-05	0.047624	chr7	69120991	OpenSea	Body;Body;Body	AUTS2;AUTS2;AUTS2	TRUE
cg27006169	-0.458342	0.632331	0.506869	0.788848	4.86746e-05	0.0684112	1.8458e-05	0.0372147	chr4	85612912	OpenSea	Body	WDFY3	TRUE
cg18469813	-0.459287	0.631734	0.507178	0.786879	4.14787e-05	0.0652212	1.91682e-05	0.0372147	chr6	168148018	OpenSea
cg07033292	-0.46087	0.630735	0.493311	0.80644	0.000237191	0.118805	4.57938e-05	0.0495848	chr15	78287690	OpenSea	3'UTR;TSS1500;3'UTR	TBC1D2B;LOC91450;TBC1D2B
cg01817709	-0.463258	0.62923	0.470518	0.841478	0.00178542	0.220322	1.3439e-05	0.0337692	chr8	135728746	S_Shelf
cg18790646	-0.46347	0.629097	0.504698	0.784159	3.74137e-05	0.0623602	2.36938e-05	0.03826	chr6	32006196	OpenSea	5'UTR;5'UTR;1stExon;1stExon	CYP21A2;CYP21A2;CYP21A2;CYP21A2
cg03504039	-0.463884	0.628837	0.494459	0.799733	0.000155641	0.0999672	2.36547e-06	0.0171992	chr2	238578435	OpenSea	Body	LRRFIP1
cg26804057	-0.468318	0.626055	0.505148	0.7759	1.8903e-05	0.0478458	0.000152004	0.0738152	chr8	99130997	S_Shore	5'UTR;5'UTR;5'UTR	POP1;POP1;POP1
cg27243507	-0.468378	0.626017	0.514454	0.761773	2.90822e-06	0.0260231	1.46994e-05	0.0347652	chr3	101808873	OpenSea			TRUE
cg22829164	-0.472842	0.623229	0.508315	0.764121	5.44003e-06	0.0300613	1.09883e-05	0.0315502	chr10	101156363	OpenSea			TRUE
cg16288421	-0.477522	0.620318	0.501612	0.767117	1.05159e-05	0.0367465	7.55108e-05	0.0585993	chr4	54213525	OpenSea	Body	SCFD2	TRUE
cg03474525	-0.479901	0.618844	0.501914	0.763015	7.07916e-06	0.0328826	1.93909e-05	0.0372147	chr6	167287812	S_Shelf
cg19542542	-0.480917	0.618216	0.501322	0.762367	6.88416e-06	0.0328826	1.50412e-05	0.0347652	chr4	41157025	OpenSea	5'UTR;5'UTR;5'UTR	APBB2;APBB2;APBB2	TRUE
cg14076360	-0.481433	0.617898	0.514691	0.7418	2.42931e-07	0.00968515	7.78802e-07	0.0113459	chr5	61917363	OpenSea	Body;Body	IPO11;IPO11	TRUE
cg06745797	-0.482053	0.617514	0.491544	0.775767	3.45589e-05	0.0615038	4.43598e-05	0.0486901	chr17	80917862	N_Shore	Body	B3GNTL1
cg08252585	-0.482399	0.617301	0.512437	0.743623	3.80709e-07	0.00968515	4.09056e-06	0.0179875	chr2	24931616	OpenSea	Body;Body;Body	NCOA1;NCOA1;NCOA1	TRUE
cg09481866	-0.48568	0.615279	0.475355	0.79639	0.000224794	0.116629	1.61614e-05	0.0357226	chr17	75373040	S_Shelf	5'UTR;5'UTR;Body;Body;Body	SEPT9;SEPT9;SEPT9;SEPT9;SEPT9
cg25232795	-0.486065	0.615042	0.456629	0.828411	0.00137995	0.204854	4.31637e-05	0.0486901	chr5	150860100	OpenSea	Body	SLC36A1	TRUE
cg02927821	-0.487651	0.614067	0.477951	0.788947	0.000136723	0.0965203	3.2779e-05	0.0430565	chr17	39216677	OpenSea	TSS1500	LOC730755	TRUE
cg27304144	-0.489319	0.613044	0.487097	0.771556	3.04261e-05	0.0577023	2.40936e-05	0.0384703	chr1	22211074	Island	Body	HSPG2
cg11118690	-0.495682	0.609155	0.489518	0.758032	8.86308e-06	0.0367465	2.14996e-05	0.03826	chr8	97351561	OpenSea			TRUE
cg23849099	-0.496547	0.608628	0.484611	0.764384	1.94545e-05	0.0483218	0.000119533	0.0686571	chr10	3457441	OpenSea
cg13844237	-0.496795	0.608478	0.461665	0.801978	0.000421334	0.142739	2.9488e-05	0.0409135	chr9	128284824	OpenSea	Body;Body;Body;Body;Body;Body	MAPKAP1;MAPKAP1;MAPKAP1;MAPKAP1;MAPKAP1;MAPKAP1	TRUE
cg04316126	-0.497228	0.608214	0.490061	0.754854	6.42662e-06	0.0328826	4.69279e-05	0.0498238	chr19	50366381	S_Shore	Body	PNKP
cg07128624	-0.49753	0.608031	0.486076	0.760584	1.32459e-05	0.040432	0.000462737	0.105712	chr12	108153566	N_Shore	Body	PRDM4
cg00042059	-0.502252	0.605166	0.473712	0.773099	5.83216e-05	0.0727327	2.05699e-05	0.0377921	chr2	55087588	OpenSea	Body	EML6	TRUE
cg05876687	-0.503301	0.604532	0.487089	0.750292	4.95411e-06	0.0284198	8.36231e-05	0.0599587	chr16	1467955	N_Shelf
cg10105262	-0.503743	0.604265	0.463469	0.787832	0.000197737	0.110724	1.71157e-05	0.0360897	chr1	224730478	OpenSea			TRUE
cg13316539	-0.504249	0.603959	0.44386	0.821805	0.00133281	0.202884	4.04566e-05	0.0479216	chr3	139112239	S_Shelf
cg02362848	-0.504351	0.603897	0.482524	0.755801	1.0548e-05	0.0367465	6.08128e-06	0.0224031	chr1	33848786	OpenSea			TRUE
cg04362711	-0.505029	0.603488	0.430741	0.845515	0.00333235	0.266808	1.73409e-05	0.0360897	chr16	88564247	Island	Body	ZFPM1
cg13221046	-0.505555	0.603171	0.440235	0.826411	0.00165128	0.215656	3.57033e-05	0.045956	chr13	113857425	OpenSea	Body;Body;Body	PCID2;PCID2;PCID2	TRUE
cg06381455	-0.506792	0.602425	0.406916	0.89187	0.0113542	0.385451	4.41897e-05	0.0486901	chr17	73472178	OpenSea	Body	KIAA0195	TRUE
cg17433546	-0.509084	0.601046	0.450636	0.801659	0.000531443	0.150307	3.88938e-05	0.0473978	chr12	107352801	S_Shelf	5'UTR	C12orf23
cg14815778	-0.509632	0.600717	0.477674	0.755454	1.31201e-05	0.040432	2.42748e-05	0.0384703	chrX	152865295	S_Shore	TSS1500;TSS1500	FAM58A;FAM58A
cg23546106	-0.511849	0.599386	0.426024	0.843294	0.00329888	0.26602	7.17095e-06	0.0252562	chr2	216764063	OpenSea			TRUE
cg15068180	-0.51337	0.598475	0.468683	0.76421	3.85528e-05	0.0627119	2.14369e-05	0.03826	chr3	194017703	S_Shelf			TRUE
cg04607334	-0.518876	0.595189	0.454548	0.779345	0.000161604	0.100733	5.74473e-06	0.0223493	chr17	27568523	OpenSea			TRUE
cg15912031	-0.522222	0.593201	0.462535	0.76078	3.89376e-05	0.0627119	4.09694e-06	0.0179875	chr10	639935	OpenSea	Body	DIP2C
cg01889025	-0.52266	0.592941	0.431975	0.813888	0.00121938	0.198925	3.80135e-05	0.0472228	chr17	75093989	OpenSea			TRUE
ch.3.2780300F	-0.523953	0.592175	0.465453	0.753397	2.00075e-05	0.0486444	0.000118524	0.0685691	chr3	140053405	OpenSea	Body	CLSTN2
cg24463527	-0.527659	0.589984	0.468215	0.743421	7.68518e-06	0.0342101	2.10035e-06	0.0171992	chr1	215648453	OpenSea			TRUE
cg08589821	-0.527759	0.589925	0.452934	0.768349	9.06134e-05	0.0840427	2.90693e-05	0.0406848	chr5	55033950	Island	5'UTR;5'UTR;5'UTR	DDX4;DDX4;DDX4
cg16104263	-0.52811	0.589718	0.424125	0.819966	0.00168813	0.217148	2.98755e-05	0.0411991	chr1	3394709	Island	Body	ARHGEF16
cg11759194	-0.529595	0.588843	0.466738	0.742893	7.95072e-06	0.034462	0.000114702	0.0677022	chr10	27447053	S_Shelf	Body	MASTL
cg10515232	-0.529847	0.588695	0.472852	0.732918	2.14593e-06	0.0226155	1.697e-05	0.0360897	chr2	240062353	S_Shore	Body	HDAC4
cg26650651	-0.529948	0.588636	0.472706	0.732996	2.18415e-06	0.0226155	1.00391e-05	0.0300132	chr7	99723100	N_Shore	3'UTR;TSS1500	CNPY4;MBLAC1
cg19997922	-0.532723	0.587004	0.453646	0.759566	5.09043e-05	0.0699638	8.11381e-06	0.0268094	chr10	35615923	OpenSea	5'UTR	CCNY	TRUE
cg23240589	-0.533514	0.58654	0.462629	0.743641	1.05199e-05	0.0367465	3.70944e-05	0.0469552	chr2	55217063	OpenSea	Body;Body;Body;Body;Body	RTN4;RTN4;RTN4;RTN4;RTN4	TRUE
cg22840650	-0.535656	0.585286	0.405282	0.845236	0.00428136	0.287822	5.38873e-06	0.0215889	chr10	99271879	OpenSea	Body	UBTD1	TRUE
cg15083845	-0.537998	0.583916	0.439801	0.775256	0.000199016	0.110738	4.08188e-05	0.0479216	chr5	1113624	S_Shore	TSS1500	SLC12A7
cg12955084	-0.539793	0.582869	0.455876	0.745239	1.66831e-05	0.0457007	3.11763e-06	0.0171992	chr19	41886265	S_Shelf	Body;Body;Body;Body;Body;Body	TMEM91;TMEM91;TMEM91;TMEM91;TMEM91;TMEM91
cg09369124	-0.540295	0.582576	0.442469	0.767047	0.000118353	0.0947753	1.24952e-05	0.0332981	chr16	89650950	Island	Body;Body	CPNE7;CPNE7
cg01969586	-0.541425	0.581919	0.462649	0.731935	3.71676e-06	0.0265506	1.50774e-05	0.0347652	chr19	45663415	OpenSea	TSS200	NKPD1
cg26248460	-0.544305	0.580245	0.455641	0.738923	1.01949e-05	0.0367465	4.25747e-05	0.0486901	chr1	229757677	N_Shelf	5'UTR;5'UTR	TAF5L;TAF5L
cg20321251	-0.544405	0.580187	0.418323	0.804682	0.00110601	0.192653	2.28772e-05	0.03826	chr2	27406724	OpenSea			TRUE
cg06828335	-0.544929	0.579883	0.438057	0.767626	0.000140127	0.0980598	3.47526e-06	0.0171992	chr10	79238225	OpenSea	Body;Body;Body;Body	KCNMA1;KCNMA1;KCNMA1;KCNMA1	TRUE
cg12108555	-0.544997	0.579844	0.446462	0.753073	4.38336e-05	0.0659569	2.49385e-05	0.0388005	chr8	124431781	S_Shelf	Body	WDYHV1
cg12705340	-0.54502	0.57983	0.4005	0.839459	0.0038906	0.280896	2.27984e-05	0.03826	chr3	38070342	N_Shore	Body	PLCD1
cg11151251	-0.54549	0.579558	0.424032	0.792127	0.000622275	0.160065	2.42508e-05	0.0384703	chr14	69522003	OpenSea	Body	DCAF5
cg13984928	-0.545563	0.579516	0.448824	0.748262	2.86362e-05	0.0556244	3.35396e-06	0.0171992	chr17	3704574	OpenSea	TSS200	ITGAE
cg04460364	-0.547057	0.57865	0.407573	0.821537	0.00221872	0.237273	2.76077e-05	0.0400304	chr17	8370017	OpenSea	Body;Body	NDEL1;NDEL1	TRUE
cg13214185	-0.54823	0.577972	0.455195	0.733865	6.80756e-06	0.0328826	2.51934e-05	0.0388201	chr14	107219616	N_Shore
cg21186263	-0.550277	0.57679	0.433692	0.767105	0.000155355	0.0999672	1.10252e-05	0.0315502	chr14	102517094	OpenSea	3'UTR	DYNC1H1
cg15445281	-0.550583	0.576614	0.4391	0.757193	7.46818e-05	0.0800668	4.26603e-05	0.0486901	chr13	51163726	OpenSea			TRUE
cg07510333	-0.551384	0.576152	0.450536	0.736791	1.11155e-05	0.03711	1.15641e-05	0.0322292	chr5	150831364	S_Shelf	5'UTR	SLC36A1
cg22248286	-0.553615	0.574868	0.420899	0.78516	0.000500324	0.147148	2.67929e-05	0.0399406	chr2	236849184	OpenSea	Body;Body	AGAP1;AGAP1	TRUE
cg22639242	-0.554935	0.57411	0.450418	0.73177	7.37874e-06	0.0333087	1.33385e-05	0.0337692	chr5	180227299	N_Shelf	5'UTR;5'UTR;5'UTR;5'UTR;5'UTR	MGAT1;MGAT1;MGAT1;MGAT1;MGAT1	TRUE
cg03970915	-0.555387	0.57385	0.416258	0.791106	0.000697876	0.166299	3.38639e-05	0.04412	chr22	47426893	S_Shelf	Body	TBC1D22A
cg01808969	-0.557096	0.57287	0.413896	0.792907	0.000781759	0.171659	4.06763e-05	0.0479216	chr7	4786364	N_Shore	Body	FOXK1
cg25307724	-0.558407	0.57212	0.390106	0.839057	0.00426172	0.287448	2.5129e-05	0.0388201	chr13	113719172	N_Shelf	Body;Body	MCF2L;MCF2L
cg04069539	-0.5609	0.570695	0.421622	0.772478	0.00028209	0.125239	3.24136e-05	0.0429284	chr16	89168963	S_Shore	Body;Body;Body	ACSF3;ACSF3;ACSF3
cg23137088	-0.561408	0.570406	0.443504	0.733618	1.22753e-05	0.0391386	2.29121e-05	0.03826	chr5	134736506	S_Shore	TSS1500	H2AFY
cg16266126	-0.562336	0.569876	0.426308	0.761794	0.000146356	0.0992041	3.33204e-07	0.0107188	chr1	153957455	OpenSea	Body	RAB13
cg16168406	-0.565579	0.568031	0.417241	0.773316	0.000326763	0.130893	2.80497e-05	0.0403141	chr11	72414453	OpenSea	Body;Body;Body	ARAP1;ARAP1;ARAP1	TRUE
cg15039415	-0.567725	0.566813	0.437982	0.73354	1.59358e-05	0.0451989	0.000144375	0.0719806	chr17	45690396	OpenSea	Body	NPEPPS	TRUE
cg24465224	-0.56856	0.566341	0.411786	0.778905	0.000471158	0.144314	2.74378e-05	0.0400304	chr8	144984599	OpenSea
cg13953978	-0.568986	0.566099	0.43711	0.733151	1.61284e-05	0.0452848	7.47053e-05	0.0582563	chr9	132600788	S_Shelf	5'UTR;5'UTR;5'UTR	USP20;USP20;USP20	TRUE
cg03836615	-0.572343	0.564202	0.400146	0.795519	0.00109497	0.191673	2.04754e-05	0.0377921	chr3	4856096	OpenSea	Body;Body;Body	ITPR1;ITPR1;ITPR1
cg09230350	-0.573316	0.563653	0.424773	0.747941	7.1209e-05	0.0792641	8.20868e-06	0.0268461	chr6	31937582	N_Shelf	TSS1500	STK19
cg07777344	-0.573773	0.563396	0.42611	0.744913	5.65862e-05	0.0719686	2.30862e-05	0.03826	chr5	10757842	N_Shelf	Body	DAP
cg10364881	-0.574169	0.563173	0.412397	0.769074	0.000304417	0.127705	7.93958e-06	0.0265629	chr11	12010020	OpenSea	Body;Body;Body	DKK3;DKK3;DKK3	TRUE
cg12639933	-0.578835	0.560551	0.376774	0.833967	0.00429424	0.287822	4.30329e-05	0.0486901	chr12	57626296	N_Shelf	Body;Body;Body;Body;Body;Body;Body;Body	SHMT2;SHMT2;SHMT2;SHMT2;SHMT2;SHMT2;SHMT2;SHMT2	TRUE
cg09291026	-0.579375	0.560248	0.423206	0.741667	5.16542e-05	0.0702254	4.42025e-05	0.0486901	chr14	81184965	OpenSea	Body	C14orf145	TRUE
cg23250741	-0.585434	0.556864	0.4073	0.76135	0.000243909	0.119715	3.8801e-05	0.0473978	chr19	11348863	OpenSea	Body;1stExon	DOCK6;LOC55908
cg14791640	-0.592764	0.552797	0.423569	0.721452	1.28214e-05	0.0400395	1.93327e-05	0.0372147	chr1	85037040	N_Shelf	Body	CTBS
cg02138953	-0.593303	0.5525	0.386901	0.788976	0.00109916	0.19219	8.47862e-06	0.0269053	chr10	75666279	OpenSea			TRUE
cg02720091	-0.593818	0.552215	0.385676	0.790667	0.00118488	0.197997	1.0917e-05	0.0315502	chr1	10699958	Island	Body	CASZ1	TRUE
cg27591920	-0.594126	0.552045	0.381407	0.799024	0.00163703	0.215165	2.05813e-05	0.0377921	chr2	111918681	OpenSea	Body;Body	BCL2L11;BCL2L11	TRUE
cg03879971	-0.594126	0.552045	0.391844	0.777743	0.000680679	0.16511	4.41058e-05	0.0486901	chr11	102123441	OpenSea			TRUE
cg13975093	-0.596006	0.551008	0.422847	0.718015	1.02221e-05	0.0367465	3.13912e-06	0.0171992	chr7	872797	OpenSea	5'UTR;Body	UNC84A;UNC84A
cg08776331	-0.597145	0.550381	0.425242	0.712344	5.70008e-06	0.0309644	3.16374e-05	0.0424264	chr16	2125989	Island	Body;Body;Body	TSC2;TSC2;TSC2
cg14051973	-0.597206	0.550347	0.424277	0.713878	6.82458e-06	0.0328826	2.06444e-06	0.0171992	chr11	1973545	N_Shore	Body	MRPL23
cg14023573	-0.598758	0.549494	0.42317	0.713527	7.04016e-06	0.0328826	2.14665e-05	0.03826	chr8	140971379	Island	Body;Body	TRAPPC9;TRAPPC9	TRUE
cg09671309	-0.60327	0.54702	0.396159	0.75533	0.000247935	0.120366	2.06351e-05	0.0377921	chr12	122158208	OpenSea	Body	TMEM120B	TRUE
cg03369999	-0.603662	0.546806	0.391371	0.763972	0.000403579	0.140945	2.65257e-05	0.039727	chr3	194342992	OpenSea	Body;Body;Body;Body	TMEM44;TMEM44;TMEM44;TMEM44
cg01101354	-0.605005	0.546071	0.411565	0.724538	2.74979e-05	0.0546815	3.21924e-06	0.0171992	chr6	33219335	S_Shore	Body	VPS52
cg27661394	-0.605515	0.545793	0.391031	0.761808	0.000372177	0.135859	2.09587e-06	0.0171992	chr4	4661952	OpenSea			TRUE
cg00731886	-0.606658	0.54517	0.425222	0.698953	1.70929e-06	0.0210705	9.78119e-06	0.0295746	chr4	1363008	N_Shore	Body	KIAA1530
cg22068743	-0.607129	0.544913	0.428854	0.692381	6.75625e-07	0.01203	2.79683e-06	0.0171992	chr2	238374408	OpenSea			TRUE
cg15835852	-0.607236	0.544855	0.413748	0.717506	1.53416e-05	0.0442977	6.38135e-05	0.0544827	chr22	38299584	N_Shelf
cg07536328	-0.609705	0.543511	0.391023	0.755465	0.000284435	0.125781	1.87934e-05	0.0372147	chr10	51592253	OpenSea	3'UTR	TIMM23
cg16805068	-0.609906	0.543402	0.40771	0.724254	3.17043e-05	0.0583986	4.69472e-05	0.0498238	chr20	31410931	S_Shelf	5'UTR	MAPRE1	TRUE
cg00656881	-0.609911	0.543399	0.403285	0.732193	6.10475e-05	0.074176	2.77274e-05	0.0400304	chr1	2138757	S_Shore	5'UTR	C1orf86
cg25026248	-0.613027	0.541709	0.372792	0.787164	0.00130402	0.20171	1.67305e-05	0.0360897	chr10	79924617	OpenSea
cg02506353	-0.614545	0.540887	0.413934	0.706777	6.71117e-06	0.0328826	1.21686e-05	0.0327762	chr5	10702346	OpenSea	Body	DAP	TRUE
cg06799735	-0.61632	0.539928	0.374313	0.778818	0.000975973	0.182851	3.97689e-05	0.0476837	chr14	105437141	OpenSea	Body	AHNAK2
cg08126118	-0.616446	0.53986	0.398903	0.730626	6.5281e-05	0.0763607	2.69962e-05	0.0400203	chr13	43930918	OpenSea	Body;Body	ENOX1;ENOX1
cg14657876	-0.618236	0.538894	0.376181	0.771988	0.000748846	0.170037	3.22535e-05	0.0428937	chr11	20036793	OpenSea	Body;Body;Body	NAV2;NAV2;NAV2	TRUE
cg07073836	-0.621111	0.537347	0.389433	0.741442	0.000156105	0.100065	2.85197e-05	0.0404454	chr3	120287165	OpenSea			TRUE
cg06437173	-0.622786	0.536448	0.392672	0.732868	9.14038e-05	0.0840427	3.98723e-05	0.0476837	chr10	50666820	OpenSea	3'UTR	ERCC6
cg11295183	-0.624044	0.535773	0.395846	0.725163	5.3263e-05	0.0705964	3.048e-05	0.0417478	chr10	466878	S_Shore	Body	DIP2C
cg19869422	-0.62503	0.535245	0.38027	0.75338	0.000338894	0.132777	2.90669e-05	0.0406848	chr17	2186014	OpenSea	Body;Body	SMG6;SMG6	TRUE
cg23261443	-0.625967	0.534744	0.374721	0.763103	0.000560397	0.154569	1.39007e-05	0.0345367	chr7	101596340	OpenSea	Body;Body;Body	CUX1;CUX1;CUX1	TRUE
cg12145488	-0.627407	0.533975	0.400745	0.711496	1.83305e-05	0.0477643	3.70274e-06	0.0171992	chr10	134514630	OpenSea	Body	INPP5A
cg20471297	-0.630501	0.532325	0.391023	0.724688	6.17933e-05	0.074176	2.03218e-05	0.0377921	chr14	102516856	OpenSea	Body	DYNC1H1
cg00473769	-0.632685	0.531164	0.378276	0.745844	0.000259071	0.121571	1.11996e-05	0.0317656	chr16	88569151	N_Shore	Body	ZFPM1
cg10177197	-0.63345	0.530757	0.370907	0.759499	0.000531122	0.150307	4.48865e-05	0.048933	chr1	55316481	OpenSea	3'UTR	DHCR24	TRUE
cg26756862	-0.633709	0.53062	0.378043	0.744776	0.000248851	0.120366	1.2571e-05	0.0332981	chr7	143012960	OpenSea	TSS1500	CLCN1
cg13720737	-0.634958	0.529957	0.372711	0.753546	0.000406914	0.140945	1.52488e-05	0.0349094	chr13	113611494	OpenSea			TRUE
cg10710472	-0.635092	0.529887	0.360354	0.779177	0.00124525	0.199231	3.51469e-05	0.0455132	chr1	8394347	N_Shore	Body	SLC45A1
cg18643383	-0.635185	0.529837	0.405771	0.691838	3.06385e-06	0.0260231	1.71021e-05	0.0360897	chr2	69864882	OpenSea	Body	AAK1	TRUE
cg03308803	-0.635516	0.529662	0.351506	0.798115	0.00238219	0.241453	2.22221e-06	0.0171992	chr7	5288118	OpenSea
cg10888811	-0.636698	0.529036	0.381755	0.733138	0.000130946	0.0958192	1.16176e-06	0.0132982	chr2	242620306	S_Shelf	Body;Body;Body	DTYMK;DTYMK;DTYMK	TRUE
cg27000934	-0.642095	0.526189	0.392453	0.705499	1.77421e-05	0.04661	9.17755e-05	0.0627173	chr4	87993109	OpenSea	Body;Body	AFF1;AFF1
cg00955413	-0.642347	0.526056	0.351105	0.788185	0.00184708	0.222798	4.34707e-05	0.0486901	chr5	114935797	N_Shore	Body;5'UTR;Body	TMED7-TICAM2;TICAM2;TMED7-TICAM2	TRUE
cg11847933	-0.642347	0.526056	0.356894	0.775399	0.00117437	0.19727	2.33638e-05	0.03826	chr1	227130394	S_Shore	5'UTR	CABC1
cg02474195	-0.643293	0.525559	0.36272	0.761502	0.000673829	0.164296	3.52173e-05	0.0455132	chr3	43391449	OpenSea	3'UTR;3'UTR	SNRK;SNRK
cg13914990	-0.646124	0.524073	0.380107	0.722568	8.05065e-05	0.0813964	2.72084e-05	0.0400203	chr12	121174878	N_Shelf	Body	ACADS
cg23217940	-0.64624	0.524012	0.391553	0.701282	1.38205e-05	0.0413975	4.36237e-06	0.018894	chr15	22954817	OpenSea	Body;TSS1500	CYFIP1;CYFIP1
cg09657673	-0.646569	0.52384	0.396714	0.691704	5.14187e-06	0.0289121	1.60449e-05	0.0357226	chr16	24769827	OpenSea	Body	TNRC6A	TRUE
cg04150954	-0.648187	0.522993	0.336183	0.813609	0.00404242	0.283317	4.38134e-05	0.0486901	chr10	80911463	OpenSea	5'UTR	ZMIZ1	TRUE
cg14418140	-0.652036	0.520984	0.383287	0.70815	3.13252e-05	0.0583986	1.45044e-05	0.0347652	chr2	240881528	S_Shelf
cg15348839	-0.65254	0.520721	0.408886	0.663145	1.22498e-07	0.00785221	9.53248e-07	0.0123117	chr2	232224846	OpenSea			TRUE
cg18542050	-0.653411	0.520268	0.40338	0.671026	4.83496e-07	0.00968515	3.13344e-06	0.0171992	chr12	89986573	OpenSea	Body;Body	ATP2B1;ATP2B1	TRUE
cg19951818	-0.653693	0.520121	0.364399	0.74239	0.000317235	0.129182	2.4845e-05	0.0388005	chr3	45969823	OpenSea	Body	FYCO1	TRUE
cg02196619	-0.655955	0.518946	0.333856	0.806652	0.00356036	0.27266	4.15596e-05	0.0484365	chr19	7505090	Island	5'UTR;1stExon	ARHGEF18;ARHGEF18
cg09668168	-0.659987	0.516858	0.358101	0.745997	0.000423312	0.142814	4.53911e-05	0.0493154	chr17	79846346	Island	Body	THOC4
cg05972185	-0.660279	0.516707	0.385023	0.69343	1.08671e-05	0.03711	5.51095e-07	0.0107188	chr16	72972644	OpenSea	Body;Body	ZFHX3;ZFHX3	TRUE
cg07094194	-0.66088	0.516397	0.359441	0.74189	0.000350284	0.133811	2.2674e-05	0.03826	chr6	31130273	S_Shelf	Body;Body	TCF19;TCF19
cg09533087	-0.661884	0.515879	0.359034	0.741242	0.000344782	0.133092	3.08892e-05	0.0418769	chr8	436965	OpenSea			TRUE
cg10676309	-0.663219	0.51519	0.338568	0.78395	0.0019591	0.227912	4.64455e-05	0.0498238	chr5	137685565	N_Shelf
cg11997536	-0.6663	0.513605	0.337181	0.782341	0.00191464	0.225856	1.5033e-05	0.0347652	chr19	16176297	N_Shelf			TRUE
cg02969798	-0.670681	0.51136	0.345992	0.755766	0.000765831	0.170801	1.89193e-05	0.0372147	chr12	123467390	S_Shore	3'UTR;3'UTR;3'UTR;3'UTR	ARL6IP4;ARL6IP4;ARL6IP4;ARL6IP4
cg06466479	-0.673425	0.509959	0.356081	0.730334	0.000238036	0.118805	3.75051e-05	0.0469552	chr5	34919428	S_Shelf	Body	BRIX1
cg18195165	-0.676585	0.50835	0.334296	0.773028	0.00155735	0.212006	2.33552e-05	0.03826	chr7	5549570	N_Shelf	Body	FBXL18
cg04016113	-0.676854	0.508213	0.380703	0.678431	4.38605e-06	0.0275637	6.33981e-06	0.0228307	chr2	73291377	OpenSea	Body	SFXN5	TRUE
cg04211309	-0.678331	0.507463	0.382855	0.672628	2.377e-06	0.0238074	9.31297e-06	0.0284271	chr16	58056296	N_Shelf			TRUE
cg19862272	-0.680784	0.50622	0.374706	0.683893	9.18901e-06	0.0367465	3.61202e-06	0.0171992	chr2	70190733	S_Shelf	TSS1500	ASPRV1
cg26628751	-0.685085	0.504047	0.337228	0.753389	0.00083511	0.175181	7.50451e-06	0.0259691	chr17	80981644	N_Shore	Body	B3GNTL1
cg17876831	-0.686187	0.503492	0.371324	0.682704	1.00156e-05	0.0367465	7.89892e-05	0.0590849	chr17	18918410	Island	Body;Body	SLC5A10;SLC5A10
cg27587095	-0.689685	0.501734	0.378715	0.664714	1.54294e-06	0.0197808	1.48985e-06	0.0154033	chr2	240062186	S_Shore	Body	HDAC4
cg22626525	-0.691797	0.500675	0.334811	0.748709	0.000752821	0.170037	3.99231e-06	0.0179875	chr1	20008900	S_Shelf	3'UTR	TMCO4
cg21440776	-0.69309	0.500029	0.347526	0.719454	0.000188669	0.108319	2.34971e-06	0.0171992	chr12	6658378	S_Shore	Body;TSS200;Body	IFFO1;IFFO1;IFFO1	TRUE
cg23070574	-0.694935	0.499107	0.36307	0.686115	1.86782e-05	0.0478458	1.82905e-05	0.0372147	chr3	14187308	OpenSea	3'UTR;Body;3'UTR	XPC;XPC;XPC
cg11817892	-0.695022	0.499064	0.356415	0.698805	5.19851e-05	0.0702254	1.08948e-05	0.0315502	chr2	97510370	OpenSea	TSS1500	ANKRD23
cg27638057	-0.695322	0.498914	0.337705	0.737078	0.000479359	0.144803	1.34864e-05	0.0337692	chr18	20882779	OpenSea	Body	C18orf45
cg26529771	-0.69611	0.498521	0.337773	0.73577	0.000456832	0.144069	1.47489e-05	0.0347652	chr16	89260650	S_Shore	Body	CDH15
cg03567939	-0.697526	0.497815	0.370023	0.669742	4.05916e-06	0.0265506	2.93063e-06	0.0171992	chr7	151506147	OpenSea	5'UTR;Body	PRKAG2;PRKAG2
cg00175150	-0.697991	0.497584	0.366723	0.675142	7.3592e-06	0.0333087	7.61641e-06	0.0259691	chr1	150486261	N_Shore	3'UTR;3'UTR	ECM1;ECM1
cg09499965	-0.699982	0.496594	0.379373	0.650035	3.48147e-07	0.00968515	1.94394e-06	0.0171992	chr7	151220664	S_Shelf
cg12085812	-0.700344	0.496414	0.350995	0.702082	7.49938e-05	0.0800668	1.14018e-05	0.0320553	chr1	45768215	N_Shore	TSS1500	LOC400752
cg05508862	-0.700615	0.49628	0.359986	0.684176	1.89589e-05	0.0478458	6.4431e-06	0.0229449	chr17	18885437	OpenSea	Body;Body;Body	SLC5A10;FAM83G;SLC5A10	TRUE
cg09863659	-0.700819	0.496179	0.373351	0.659415	1.36924e-06	0.0190802	3.06713e-05	0.041831	chr20	30328246	S_Shore	5'UTR	TPX2
cg27659109	-0.703819	0.494692	0.361174	0.67757	1.15922e-05	0.0375287	2.72915e-06	0.0171992	chr19	3509838	S_Shelf	5'UTR	FZR1
cg17881203	-0.704667	0.494273	0.329857	0.740642	0.000637864	0.161493	1.01135e-05	0.0300132	chr19	990398	Island	Body	WDR18
cg05982389	-0.708176	0.492542	0.343622	0.706	0.000115658	0.0945632	3.9098e-05	0.0474662	chr3	105839222	OpenSea			TRUE
cg06551697	-0.709136	0.492069	0.354637	0.68276	2.19973e-05	0.0504392	5.22771e-07	0.0107188	chr17	56612362	S_Shelf			TRUE
cg19137649	-0.712376	0.490478	0.35811	0.671772	9.0398e-06	0.0367465	4.85391e-05	0.0505097	chr10	64025887	N_Shelf	Body	RTKN2
cg04458317	-0.715048	0.489169	0.355997	0.672157	1.03324e-05	0.0367465	6.35428e-07	0.0107188	chr13	113735558	S_Shelf	Body;Body	MCF2L;MCF2L
cg17620425	-0.717109	0.488162	0.385479	0.618197	2.6577e-09	0.000425901	5.88889e-08	0.00377483	chr13	37403552	OpenSea	3'UTR	RFXAP
cg03092399	-0.717609	0.487918	0.360011	0.661268	3.72078e-06	0.0265506	2.7479e-05	0.0400304	chr11	108149307	OpenSea	Body	ATM	TRUE
cg09282946	-0.719206	0.487139	0.353265	0.671747	1.1504e-05	0.0375287	1.20393e-05	0.0327762	chr22	43551751	S_Shelf	5'UTR;5'UTR	TSPO;TSPO
cg10664784	-0.72155	0.485999	0.336465	0.701988	0.000120069	0.0947753	1.8525e-05	0.0372147	chr17	4075258	OpenSea	Body	ANKFY1
cg02473237	-0.722206	0.48568	0.345408	0.682916	3.27902e-05	0.0600537	5.22072e-06	0.0214521	chr6	139004011	OpenSea			TRUE
cg19774788	-0.723042	0.485274	0.319503	0.737052	0.000697097	0.166299	2.54814e-05	0.03889	chr3	52127988	OpenSea	Body;Body;Body	WDR51A;WDR51A;WDR51A
cg19270469	-0.723535	0.485034	0.358096	0.65697	2.95775e-06	0.0260231	5.42463e-07	0.0107188	chr11	64023919	N_Shore	Body	PLCB3
cg12159166	-0.724127	0.484748	0.319097	0.736393	0.000688135	0.165827	1.98133e-05	0.0377921	chr11	75649913	OpenSea	Body	UVRAG	TRUE
cg05296566	-0.731165	0.481348	0.348867	0.664137	8.51247e-06	0.0363771	2.20158e-05	0.03826	chr14	21850196	N_Shore	Body	SUPT16H
cg12072393	-0.731225	0.481319	0.3025	0.765844	0.00203036	0.229611	1.92511e-05	0.0372147	chr1	1273707	S_Shore	Body	DVL1
cg12588208	-0.732375	0.480766	0.35309	0.65461	3.31121e-06	0.0265506	3.1477e-06	0.0171992	chr3	119547934	OpenSea	Body;Body	GSK3B;GSK3B	TRUE
cg13447284	-0.734966	0.479522	0.349786	0.657377	4.96564e-06	0.0284198	3.62107e-06	0.0171992	chr17	63116336	N_Shelf
cg18013299	-0.739915	0.477154	0.327835	0.694486	0.000111639	0.0931792	3.09801e-05	0.0418769	chr11	61170469	OpenSea	3'UTR;3'UTR;3'UTR	CPSF7;CPSF7;CPSF7
cg06487442	-0.742053	0.476135	0.347059	0.653217	4.2353e-06	0.0271486	2.8911e-06	0.0171992	chr6	41757330	S_Shore	3'UTR	TOMM6
cg22384801	-0.747397	0.473597	0.354132	0.633364	4.6724e-07	0.00968515	7.01747e-07	0.0112456	chr15	60767308	N_Shelf	5'UTR;Body	NARG2;NARG2
cg12418043	-0.747443	0.473576	0.340028	0.659575	9.77674e-06	0.0367465	3.12709e-06	0.0171992	chr5	141900671	OpenSea			TRUE
cg19807520	-0.748572	0.473042	0.35223	0.635291	6.51978e-07	0.01203	1.34202e-05	0.0337692	chr5	178049773	N_Shelf	Body	CLK4
cg11949175	-0.750902	0.471941	0.309974	0.718539	0.000463368	0.144088	2.01014e-05	0.0377921	chr2	135970350	OpenSea	Body	ZRANB3	TRUE
cg09369954	-0.754966	0.470026	0.33221	0.665016	2.00804e-05	0.0486444	1.32488e-05	0.0337692	chr1	32663763	N_Shelf	3'UTR	TXLNA	TRUE
cg07212747	-0.759496	0.467902	0.324332	0.675026	4.87165e-05	0.0684112	8.40634e-06	0.0269053	chr16	4539233	OpenSea	5'UTR;5'UTR;5'UTR	HMOX2;HMOX2;HMOX2	TRUE
cg19863584	-0.761106	0.46715	0.322396	0.676896	5.76395e-05	0.0724458	1.55673e-05	0.0351413	chr5	859668	OpenSea
cg06507678	-0.761851	0.466802	0.297764	0.731799	0.000896458	0.17797	1.72849e-05	0.0360897	chr5	114919500	OpenSea	Body;5'UTR;Body	TMED7-TICAM2;TICAM2;TMED7-TICAM2	TRUE
cg14678084	-0.762897	0.466313	0.306987	0.70833	0.000347963	0.133384	3.95319e-05	0.0476321	chr7	127627251	OpenSea	Body	SND1	TRUE
cg08224307	-0.765788	0.464968	0.303326	0.712748	0.000441915	0.144069	2.44862e-05	0.0384703	chr2	187581790	OpenSea	Body	FAM171B	TRUE
cg05896368	-0.780145	0.45834	0.297818	0.705382	0.000390197	0.138955	1.95455e-06	0.0171992	chr16	67691180	N_Shelf	Body	RLTPR
cg27458152	-0.78146	0.457737	0.335465	0.624575	8.29142e-07	0.0139865	2.72978e-07	0.0107188	chr8	22249664	OpenSea	5'UTR;5'UTR;5'UTR;5'UTR	SLC39A14;SLC39A14;SLC39A14;SLC39A14	TRUE
cg06099697	-0.784645	0.456282	0.302914	0.687302	0.000174039	0.103518	7.95634e-06	0.0265629	chr16	88539861	Island	Body	ZFPM1
cg04831327	-0.786308	0.455523	0.31375	0.661359	3.57458e-05	0.061676	6.31289e-06	0.0228307	chr12	114299076	OpenSea	Body;Body;Body	RBM19;RBM19;RBM19	TRUE
cg09150733	-0.79217	0.452861	0.31541	0.650212	1.76749e-05	0.04661	2.94538e-06	0.0171992	chr7	75984284	N_Shelf	Body	YWHAG
cg17749374	-0.792173	0.45286	0.303888	0.674862	9.94116e-05	0.086817	3.1097e-05	0.0418769	chr4	2797201	S_Shore	5'UTR	SH3BP2	TRUE
cg17074656	-0.795526	0.451344	0.321212	0.634196	4.55873e-06	0.0280979	1.29126e-06	0.0142708	chr11	63784126	OpenSea	Body	MACROD1
cg24150528	-0.796865	0.45074	0.322077	0.630801	3.36968e-06	0.0265506	2.25422e-06	0.0171992	chr5	43125550	S_Shelf	Body	ZNF131
cg24283662	-0.799846	0.449398	0.326711	0.618156	8.79325e-07	0.0140914	4.7954e-06	0.0199603	chr3	11519911	OpenSea	Body;Body;Body	ATG7;ATG7;ATG7	TRUE
cg02108731	-0.800522	0.449094	0.318785	0.63267	4.69233e-06	0.0283757	5.92719e-06	0.0223493	chr22	50297217	OpenSea	3'UTR	ALG12
cg04337476	-0.80183	0.448508	0.308229	0.652628	2.79085e-05	0.0548759	5.92495e-06	0.0223493	chr7	879822	OpenSea	Body;Body	UNC84A;UNC84A
cg22790777	-0.812708	0.443655	0.292421	0.673105	0.000132816	0.095829	8.44475e-06	0.0269053	chr17	42397605	N_Shelf	Body;Body	SLC25A39;SLC25A39
cg10817916	-0.816449	0.441998	0.296923	0.657957	5.76312e-05	0.0724458	2.24519e-05	0.03826	chr17	61511069	N_Shore	3'UTR;3'UTR;3'UTR	CYB561;CYB561;CYB561	TRUE
cg20208853	-0.816476	0.441987	0.305271	0.639931	1.53178e-05	0.0442977	3.69091e-05	0.0469425	chr6	31862943	N_Shore	Body;Body	EHMT2;EHMT2
cg06758327	-0.817697	0.441447	0.307851	0.633018	8.73374e-06	0.0367465	5.91887e-06	0.0223493	chr1	185130427	S_Shelf	Body;Body	C1orf26;C1orf26
cg08241401	-0.817853	0.441378	0.314628	0.619192	2.18743e-06	0.0226155	1.42771e-06	0.0152529	chr20	3824289	N_Shelf
cg09327582	-0.841637	0.431004	0.280203	0.662964	0.000127703	0.0956726	4.00961e-07	0.0107188	chr14	35236912	OpenSea	Body;Body	BAZ1A;BAZ1A	TRUE
cg10149889	-0.856083	0.424823	0.267273	0.675244	0.000293686	0.127217	4.18013e-05	0.0485416	chr3	187930530	OpenSea	TSS200;5'UTR	LPP;LPP
cg15317628	-0.86115	0.422676	0.268912	0.664362	0.000189758	0.108319	8.90091e-06	0.0276969	chr11	8653329	OpenSea	Body	TRIM66	TRUE
cg08116711	-0.870216	0.418861	0.288489	0.608151	4.7842e-06	0.0283954	3.44438e-07	0.0107188	chr7	101596218	OpenSea	Body;Body;Body	CUX1;CUX1;CUX1	TRUE
cg05889266	-0.873074	0.417666	0.272535	0.640081	6.11619e-05	0.074176	1.6061e-05	0.0357226	chr1	59361647	OpenSea			TRUE
cg21515785	-0.874173	0.417207	0.287897	0.604596	3.86636e-06	0.0265506	2.56343e-06	0.0171992	chr5	99886768	OpenSea	Body	FAM174A	TRUE
cg13766589	-0.877372	0.415874	0.250452	0.690558	0.000696464	0.166299	3.13557e-06	0.0171992	chr9	139331009	N_Shore	Body	INPP5E
cg26130023	-0.882082	0.41392	0.279315	0.613392	1.10575e-05	0.03711	2.35152e-05	0.03826	chr18	45453609	N_Shelf	5'UTR;5'UTR;5'UTR	SMAD2;SMAD2;SMAD2
cg13990980	-0.893653	0.409158	0.279825	0.598269	4.02653e-06	0.0265506	1.21695e-05	0.0327762	chr14	69891511	OpenSea	Body	SLC39A9	TRUE
cg14113003	-0.904796	0.404624	0.245385	0.667199	0.000391409	0.139078	4.00747e-05	0.0477475	chr19	1393378	Island	Body	NDUFS7
cg23160896	-0.906152	0.404076	0.246446	0.662528	0.000328352	0.130893	3.66572e-05	0.0468078	chr3	150497174	Island
cg05320944	-0.907507	0.403529	0.25818	0.630705	6.81109e-05	0.0773273	1.0141e-06	0.0125009	chr14	76018865	OpenSea			TRUE
cg05317956	-0.908395	0.403171	0.270624	0.600636	7.95681e-06	0.034462	2.69304e-06	0.0171992	chr10	99409824	OpenSea	Body	PI4K2A	TRUE
cg07145834	-0.913015	0.401312	0.264587	0.60869	1.74118e-05	0.0465046	4.06499e-06	0.0179875	chr8	123878522	OpenSea	5'UTR	ZHX2	TRUE
cg00731650	-0.919826	0.398588	0.261129	0.608408	2.0186e-05	0.0486444	2.24165e-05	0.03826	chr17	80771634	N_Shore	Body	TBCD
cg26789859	-0.921177	0.39805	0.272378	0.581707	1.94662e-06	0.0222821	7.64325e-07	0.0113459	chr16	81066575	N_Shelf	3'UTR	CENPN
cg08627380	-0.922515	0.397518	0.261294	0.604762	1.63899e-05	0.0452848	4.27373e-05	0.0486901	chr6	170858811	N_Shelf	Body	PSMB1
cg03376089	-0.932084	0.393732	0.274745	0.564251	3.83489e-07	0.00968515	6.074e-07	0.0107188	chr17	17839409	OpenSea	Body;Body	TOM1L2;TOM1L2	TRUE
cg03328201	-0.938856	0.391075	0.274128	0.557913	2.231e-07	0.00968515	1.27427e-08	0.00377483	chr22	22007633	S_Shore	Body	MIR130B
cg01716419	-0.940587	0.390399	0.243015	0.627167	0.000100698	0.0870506	1.88926e-05	0.0372147	chr8	11759663	N_Shore			TRUE
cg13899780	-0.992344	0.370707	0.252312	0.544657	4.30008e-07	0.00968515	1.54806e-07	0.00727464	chr11	70858572	OpenSea	5'UTR	SHANK2
cg05767546	-1.00852	0.364758	0.263512	0.504906	1.20608e-09	0.000386552	3.61725e-08	0.00377483	chr1	70816768	N_Shelf	Body	ANKRD13C
cg07940428	-1.00985	0.364274	0.246942	0.537356	3.55642e-07	0.00968515	9.60338e-07	0.0123117	chr4	185378132	S_Shore	5'UTR	IRF2
cg19668010	-1.01939	0.360815	0.246085	0.529033	1.78087e-07	0.00951295	4.87523e-07	0.0107188	chr12	102517154	S_Shelf	5'UTR	C12orf48
cg01477253	-1.02268	0.359629	0.237575	0.544388	1.3336e-06	0.0190802	8.29844e-07	0.0115638	chr2	74885882	S_Shelf	Body	SEMA4F
cg12297546	-1.02674	0.358174	0.221074	0.580297	3.03925e-05	0.0577023	2.36868e-05	0.03826	chr3	187938319	OpenSea	5'UTR;5'UTR	LPP;LPP	TRUE
cg19297537	-1.03016	0.356951	0.248322	0.5131	2.63517e-08	0.00211145	3.49066e-08	0.00377483	chr10	71142369	OpenSea	Body;Body;Body;Body;Body	HK1;HK1;HK1;HK1;HK1
cg08717931	-1.03099	0.356653	0.234888	0.541538	1.3099e-06	0.0190802	4.86421e-08	0.00377483	chr1	32617124	OpenSea	Body	KPNA6	TRUE
cg09472928	-1.07004	0.342994	0.215327	0.546354	6.64346e-06	0.0328826	7.55645e-06	0.0259691	chr5	175393743	N_Shore	Body	THOC3
cg08878651	-1.08092	0.339282	0.235893	0.487984	5.57687e-09	0.000595803	1.58883e-07	0.00727464	chr17	30066757	OpenSea			TRUE
cg09342325	-1.10787	0.33026	0.196745	0.554381	2.7639e-05	0.0546815	4.6017e-06	0.0194061	chr2	220371699	OpenSea	3'UTR;3'UTR	GMPPA;GMPPA
cg04205653	-1.18641	0.305315	0.18547	0.502602	3.08539e-06	0.0260231	6.32102e-07	0.0107188	chr21	46225890	S_Shelf	3'UTR	SUMO3

## Sheet: TAM (single-locus)
Additional file 13 – Results of single-locus survival analysis adjusted for clinical varables with/without luminal status, TAM cohort
Annotation based on IlluminaHumanMethylation450kanno.ilmn12.hg19 R package
HR, hazard ratio; CI, confidence interval; Adj. P-value, Benjamini-Hochberg adjusted P-value; pos, position on the chromosome (indicated in column 'chr')
All columns except column F (P-value (lum.) and column G (Adj. P-value (lum.)) are for the single-locus analysis without adjusting for luminal status (see Additional File 4)
	Not in original signature
	In both signatures
	Not in signature after correction for luminal status
CpG ID	log(HR)	HR	P-value	Adj. P-value	P-value (lum.)	Adj. P-value (lum.)	chr	pos	Relation_to_Island	UCSC_RefGene_Group	UCSC_RefGene_Name	Enhancer
cg07244783	-1.00934	0.364458	1.40942e-07	0.0150574	2.73563e-06	0.101213	chr4	4432211	OpenSea	Body	STX18	TRUE
cg02506353	-1.22087	0.294975	7.13494e-07	0.0457356	5.95062e-06	0.112284	chr5	10702346	OpenSea	Body	DAP	TRUE
cg23217940	-1.4849	0.226524	3.16211e-08	0.0101347	1.45756e-07	0.0238397	chr15	22954817	OpenSea	Body;TSS1500	CYFIP1;CYFIP1
cg03376089	-1.68389	0.18565	2.04543e-07	0.0163892	2.69843e-06	0.101213	chr17	17839409	OpenSea	Body;Body	TOM1L2;TOM1L2	TRUE
cg12218895	-1.70876	0.18109	7.56755e-08	0.0121271	1.48764e-07	0.0238397	chr20	3898940	OpenSea	Body;TSS1500;Body;Body	PANK2;MIR103-2AS;PANK2;PANK2	TRUE

## Sheet: AI  (single-locus)
Additional file 13 – Results of single-locus survival analysis adjusted for clinical variables with/without luminal status, AI cohort
Annotation based on IlluminaHumanMethylation450kanno.ilmn12.hg19 R package
HR, hazard ratio; CI, confidence interval; Adj. P-value, Benjamini-Hochberg adjusted P-value; pos, position on the chromosome (indicated in column 'chr')
All columns except column F (P-value (lum.) and column G (Adj. P-value (lum.)) are for the single-locus analysis without adjusting for luminal status (see Additional File 4)
	In both signatures
CpG ID	log(HR)	HR	P-value	Adj. P-value	P-value (lum.)	Adj. P-value (lum.)	chr	pos	Relation_to_Island	UCSC_RefGene_Group	UCSC_RefGene_Name	Enhancer
cg00435408	-1.33928	0.262034	3.73904e-08	0.0120556	9.56111e-08	0.0308275	chr16	57220662	S_Shore	TSS1500;5'UTR	FAM192A;RSPRY1

## Sheet: ER+HER2- (multi-locus)
Additional file 13 – Results of survival analysis of the multi-locus signature using the risk score corrected for clinical variables including luminal status, ER+/HER2- cohort
HR, hazard ratio; CI, confidence interval
	log(HR)	CI (lo 95)	CI (hi 95)	HR	CI (lo 95)	CI (hi 95)	P-value
Stage (per stage increment)	0.373848	-0.0535905	0.801287	1.45332	0.94782	2.22841	0.0242665
Age (per 1-yr increment)	0.013219	-0.00579932	0.0322373	1.01331	0.994217	1.03276	0.0733939
AI treatment (vs. no AI treatment)	-0.194353	-0.779807	0.391102	0.823367	0.458495	1.47861	0.392498
Risk score (per risk score increment)	2.78723	2.19746	3.37699	16.2359	9.00213	29.2826	0
Luminal B (vs. luminal A)	-0.0663014	-0.961485	0.828882	0.935849	0.382325	2.29076	0.8487

## Sheet: TAM (multi-locus)
Additional file 13 – Results of survival analysis of the multi-locus signature using the risk score corrected for clinical variables including luminal status, TAM cohort
HR, hazard ratio; CI, confidence interval
	log(HR)	CI (lo 95)	CI (hi 95)	HR	CI (lo 95)	CI (hi 95)	P-value
Stage (per stage increment)	0.439411	-0.187253	1.06608	1.55179	0.829234	2.90396	0.169346
Age (per 1-yr increment)	0.0301671	-0.00234318	0.0626774	1.03063	0.99766	1.06468	0.0689573
Risk score (per risk score increment)	3.10456	2.23491	3.97421	22.2994	9.3456	53.2082	2.61796e-12
Luminal B (vs. luminal A)	1.07768	-1.05923	3.21458	2.93784	0.346723	24.8929	0.322936

## Sheet: AI (multi-locus)
Additional file 13 – Results of survival analysis of the multi-locus signature using the risk score corrected for clinical variables including luminal status, AI cohort
HR, hazard ratio; CI, confidence interval
	log(HR)	CI (lo 95)	CI (hi 95)	HR	CI (lo 95)	CI (hi 95)	P-value
Stage (per stage increment)	-0.0139966	-0.568894	0.5409	0.986101	0.566151	1.71755	0.96057
Age (per 1-yr increment)	-0.00193851	-0.0356011	0.031724	0.998063	0.965025	1.03223	0.910135
Risk score (per risk score increment)	3.42041	2.56016	4.28065	30.5818	12.9379	72.2876	6.54577e-15
Luminal B (vs. luminal A)	-0.147806	-1.39132	1.09571	0.862598	0.248747	2.9913	0.815789
