# Supplementary material for: Candidate methylation sites associated with endocrine therapy resistance in ER+/HER2- breast cancer
Source: BMC Cancer. 2020 Jul 19;20:676. doi: 10.1186/s12885-020-07100-z (PMC7368985; doi:10.1186/s12885-020-07100-z)
Supplement: Supplementary file 14 — Additional file 14. CpGs with concordant significant changes in the survival and resistance acquisition signatures and with significant correlation between paired DNA methylation and gene expression profiles. CpGs in single-locus (Additional File 4) and multi-locus (Additional File 7) survival signatures were selected according to three additional criteria: (i) CpG DNA methylation is significantly (adjusted p-value < 0.05) (anti-)correlated with expression of the nearby gene(s), (ii) CpG is also significantly differentially methylated (adjusted p-value < 0.05) in the corresponding RA signature at month 7 versus WT, (iii) CpG changes concordantly in survival and corresponding RA signature, that is, risk increasing loci are hypermethylated and risk decreasing loci are hypomethylated. [file 12885_2020_7100_MOESM14_ESM.xlsx]

## Sheet: SELECTION
Additional file 14 – CpGs with concordant significant changes in survival and resistance acquisition signatures
Gene		Gene symbol|Entrez Gene ID of gene nearest to CpG
Position		Gene region of CpG site
HR		Hazard ratio (single-locus survival analysis)
Coefficient		Coefficient in Cox model (multi-locus survival analysis)
Correlation coefficient		Pearson correlation between gene expression and methylation profiles
Delta beta (M7 vs. WT)		Methylation beta value difference at month 7 versus WT
Single-locus survival analysis, ER+/HER2- cohort
CpG ID	Gene	Position	HR	Correlation coefficient	Delta beta (M7 vs. WT)
cg07145834	ZHX2	5'UTR	0.401312	0.133855	-0.0962962
Multi-locus survival analysis, ER+/HER2- cohort
CpG ID	Gene	Position	HR	Coefficient	Correlation coefficient	Delta beta (M7 vs. WT)
cg00448868	DYNC1LI2|1783	Body	0.75289	-0.000150103	-0.231706	-0.317959
cg05647859	LIN7A|8825	TSS200	1.17422	0.000798449	-0.322033	0.106814
cg14094027	PXN|5829	5'UTR;Body;Body	0.654226	-0.00749658	-0.192247	-0.0449181
cg14451276	AOAH|313	1stExon;5'UTR	1.27199	0.00953019	-0.391885	0.0849889
cg00622105	SPRED2;SPRED2	TSS1500;Body	0.686943	-0.00488372	-0.107932	-0.251625
cg14711869	FAM193A	OpenSea	0.653166	-0.0111023	-0.110434	-0.113299
cg22143547	GLO1	TSS1500	0.61492	-0.00225603	0.104827	-0.0670062
Multi-locus survival analysis, AI cohort
CpG ID	Gene	Position	HR	Coefficient	Correlation coefficient	Delta beta (M7 vs. WT)
cg02198582	TSC2|7249	Body;Body;Body	0.455666	-0.00282028	-0.293558	-0.162208
cg19767477	SLC12A2|6558	Body	1.34126	0.00559845	-0.389274	0.0396005
cg07022343	GALNT2	Body	0.45516	-0.0133334	-0.206915	-0.120701
